# Supplementary material for: Essential Genes Embody Increased Mutational Robustness to Compensate for the Lack of Backup Genetic Redundancy
Source: PubMed Central journal article supplement (PMC5173180; doi:10.1371/journal.pone.0168444), 2016-12-20

**S1 Fig. Comparison between essential and non essential genes with similar expression values.**

Each x-axis value represents the middle of a (sliding) window with a percentile margin of 40% from which the relevant genes were compared. Y-axis values are  $-\log_{10}(\text{p-value})$ , where p-value is the result of a wilcoxon one sided test between the relevant essential and non-essential genes. Significance threshold ( $-\log_{10}(0.05)$ ) is marked by a horizontal black line. Each colored curve corresponds to a different expression vector extracted from different sample in each dataset.

Using an expression range with a margin lower than 40% for the comparison only raised the minimal expression threshold for significance (because there are few essential genes with low expression levels).

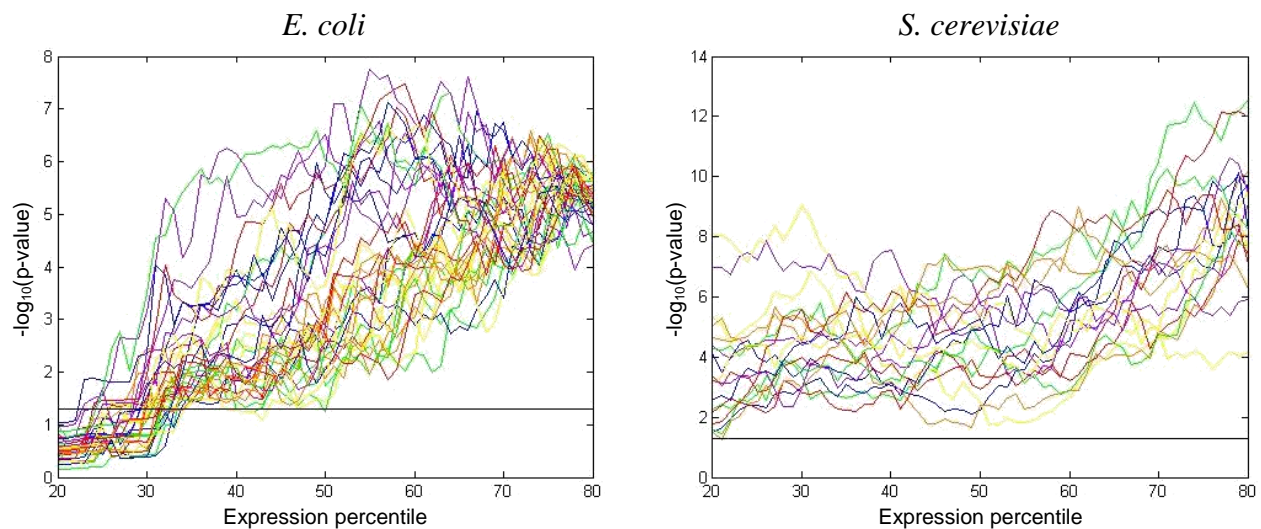

Supplement: pone.0168444.s001.pdf [file pone.0168444.s001.pdf]
