# Supplementary material for: Essential Genes Embody Increased Mutational Robustness to Compensate for the Lack of Backup Genetic Redundancy
Source: PubMed Central journal article supplement (PMC5173180; doi:10.1371/journal.pone.0168444), 2016-12-20
Supplement: pone.0168444.s005.pdf [file pone.0168444.s005.pdf]

**S1 Table. Correlation between conservation, efficiency and robustness scores, for *E. coli* and *S. cerevisiae*.**

| <b>Organism</b>      |             | <b>Correlation</b>        | <b>Genes</b> | <b>coefficient</b> | <b>p-value</b> |
|----------------------|-------------|---------------------------|--------------|--------------------|----------------|
| <i>E. coli</i>       | Genome wide | efficiency - robustness   | 4259         | -0.0622            | 4.81e-05       |
|                      |             | efficiency – conservation | 2944         | 0.1231             | 2.03e-11       |
|                      |             | robustness - conservation |              | 0.0034             | 0.054          |
|                      | model       | efficiency - robustness   | 1304         | -0.0245            | 0.3759         |
|                      |             | efficiency – conservation | 1115         | 0.1478             | 7.17e-7        |
|                      |             | robustness - conservation |              | 0.0611             | 0.0413         |
| <i>S. cerevisiae</i> | Genome wide | efficiency - robustness   | 6043         | 0.1011             | 3.37e-15       |
|                      |             | efficiency – conservation | 2962         | 0.5441             | 6.75e-228      |
|                      |             | robustness - conservation |              | -0.0824            | 7.14e-6        |
|                      | model       | efficiency - robustness   | 874          | 0.2588             | 7.63e-15       |
|                      |             | efficiency – conservation | 475          | 0.7025             | 0              |
|                      |             | robustness - conservation |              | 0.2835             | 3.15e-10       |
