# Supplementary material for: Essential Genes Embody Increased Mutational Robustness to Compensate for the Lack of Backup Genetic Redundancy
Source: PubMed Central journal article supplement (PMC5173180; doi:10.1371/journal.pone.0168444), 2016-12-20
Supplement: pone.0168444.s006.pdf [file pone.0168444.s006.pdf]

**S2 Table. Hypergeometric p-values, measuring the random overlap probability between genes that encode lysine acetylated proteins and essential genes from several *E. coli* datasets.**

| <b>Data set</b>            | <b>HG p-value</b> |
|----------------------------|-------------------|
| Gerdes et al., 2003 [10]   | 3.38e-12          |
| Hashimoto et al, 2005 [11] | 9.68e-35          |
| Joyce et al., 2006 [12]    | 6.13e-05          |
| Baba et al., 2006 [13]     | 7.91e-26          |
| GSM                        | 2.61e-37          |
