# Supplementary material for: Essential Genes Embody Increased Mutational Robustness to Compensate for the Lack of Backup Genetic Redundancy
Source: PubMed Central journal article supplement (PMC5173180; doi:10.1371/journal.pone.0168444), 2016-12-20
Supplement: pone.0168444.s007.pdf [file pone.0168444.s007.pdf]

**S3 Table. Codons' efficiency and robustness scores.**

| Codon | amino acid | <i>E. coli</i> |            | <i>S. cerevisiae</i> |            | robustness |
|-------|------------|----------------|------------|----------------------|------------|------------|
|       |            | TE             | efficiency | TE                   | efficiency |            |
| TTT   | Phe        | 0.10975        | 0.439      | 0.27032              | 0.438999   | 1.13E-07   |
| TTC   | Phe        | 0.25           | 2.277904   | 0.615764             | 2.277908   | 1.13E-07   |
| TTA   | Leu        | 0.125          | 0.757576   | 0.431034             | 1.334419   | 0.0009119  |
| TTG   | Leu        | 0.165          | 0.403333   | 0.753695             | 22.29445   | 4.54E-05   |
| TCT   | Ser        | 0.10975        | 0.256377   | 0.67734              | 28.57028   | 0.0009119  |
| TCC   | Ser        | 0.25           | 6.90274    | 0.487685             | 7.67795    | 0.0009119  |
| TCA   | Ser        | 0.125          | 0.431421   | 0.184797             | 0.158295   | 0.0497871  |
| TCG   | Ser        | 0.165          | 1.309777   | 0.12069              | 0.028799   | 0.0024788  |
| TAT   | Tyr        | 0.164625       | 0.439      | 0.216256             | 0.439      | 8.32E-07   |
| TAC   | Tyr        | 0.375          | 2.277904   | 0.492611             | 2.277907   | 8.32E-07   |
| TAA   | Stop       | -1             | 1          | -1                   | 1          | 1          |
| TAG   | Stop       | -1             | 1          | -1                   | 1          | 1          |
| TGT   | Cys        | 0.054875       | 0.439      | 0.108128             | 0.439      | 1.71E-15   |
| TGC   | Cys        | 0.125          | 2.277904   | 0.246305             | 2.277902   | 1.71E-15   |
| TGA   | Stop       | -1             | 1          | -1                   | 1          | 1          |
| TGG   | Trp        | 0.165          | 1          | 0.369458             | 1          | 1.15E-17   |
| CTT   | Leu        | 0.054875       | 0.019584   | 0.027032             | 0.029377   | 3.06E-07   |
| CTC   | Leu        | 0.125          | 0.527293   | 0.061576             | 0.79093    | 3.06E-07   |
| CTA   | Leu        | 0.125          | 0.527293   | 0.184729             | 27.45719   | 2.26E-06   |
| CTG   | Leu        | 0.54           | 601.0305   | 0.059113             | 0.052688   | 6.14E-06   |
| CCT   | Pro        | 0.054875       | 0.064094   | 0.123153             | 0.173609   | 1.67E-05   |
| CCC   | Pro        | 0.125          | 1.725685   | 0.08867              | 0.046655   | 1.67E-05   |
| CCA   | Pro        | 0.125          | 1.725685   | 0.615776             | 108.5134   | 4.54E-05   |
| CCG   | Pro        | 0.165          | 5.239107   | 0.197044             | 1.137746   | 4.54E-05   |
| CAT   | His        | 0.054875       | 0.439      | 0.189224             | 0.439      | 0.0497871  |
| CAC   | His        | 0.125          | 2.277904   | 0.431034             | 2.277903   | 0.0497871  |
| CAA   | Gln        | 0.25           | 0.757576   | 0.554187             | 2.319589   | 2.7182818  |
| CAG   | Gln        | 0.33           | 1.32       | 0.238916             | 0.431111   | 2.7182818  |
| CGT   | Arg        | 0.5            | 5555.56    | 0.369458             | 83211.64   | 2.06E-09   |
| CGC   | Arg        | 0.36           | 14929.92   | 0.26601              | 22362.26   | 2.06E-09   |
| CGA   | Arg        | 0.00005        | 2.22E-15   | 0.000037             | 4.57E-16   | 8.32E-07   |
| CGG   | Arg        | 0.125          | 164.4045   | 0.061576             | 14.2046    | 8.32E-07   |
| ATT   | Ile        | 0.164625       | 0.442822   | 0.800493             | 9.0219     | 0.0497871  |
| ATC   | Ile        | 0.375          | 5.234027   | 0.576355             | 3.367407   | 0.0497871  |
| ATA   | Ile        | 0.163204       | 0.431454   | 0.123233             | 0.032916   | 0.1353353  |
| ATG   | Met        | 1              | 1          | 0.615764             | 1          | 20.085537  |

| Codon | amino acid | <i>E. coli</i> |            | <i>S. cerevisiae</i> |            | robustness |
|-------|------------|----------------|------------|----------------------|------------|------------|
|       |            | TE             | efficiency | TE                   | efficiency |            |
| ACT   | Thr        | 0.10975        | 0.14587    | 0.67734              | 18.4221    | 7.3890561  |
| ACC   | Thr        | 0.25           | 3.927421   | 0.487685             | 4.950736   | 7.3890561  |
| ACA   | Thr        | 0.125          | 0.245464   | 0.246373             | 0.322467   | 0.0067379  |
| ACG   | Thr        | 0.29           | 7.111144   | 0.140394             | 0.034002   | 0.0024788  |
| AAT   | Asn        | 0.2195         | 0.439      | 0.27032              | 0.438999   | 0.3678794  |
| AAC   | Asn        | 0.5            | 2.277904   | 0.615764             | 2.277908   | 0.3678794  |
| AAA   | Lys        | 0.75           | 3.125      | 0.431034             | 0.431034   | 0.0024788  |
| AAG   | Lys        | 0.24           | 0.32       | 1                    | 2.320003   | 0.1353353  |
| AGT   | Ser        | 0.054875       | 0.439      | 0.054064             | 0.438999   | 0.0067379  |
| AGC   | Ser        | 0.125          | 2.277904   | 0.123153             | 2.277911   | 0.0067379  |
| AGA   | Arg        | 0.125          | 1893.939   | 0.67734              | 44551.21   | 2.26E-06   |
| AGG   | Arg        | 0.165          | 1.7424     | 0.278325             | 1.857318   | 6.14E-06   |
| GTT   | Val        | 0.10975        | 0.042302   | 0.862069             | 51.52098   | 1.67E-05   |
| GTC   | Val        | 0.25           | 1.138952   | 0.62069              | 13.8457    | 1.67E-05   |
| GTA   | Val        | 0.625          | 44.49032   | 0.123239             | 0.021518   | 0.0067379  |
| GTG   | Val        | 0.2            | 0.466515   | 0.162562             | 0.065147   | 0.0003355  |
| GCT   | Ala        | 0.10975        | 0.117506   | 0.67734              | 21.00232   | 1          |
| GCC   | Ala        | 0.25           | 3.163756   | 0.487685             | 5.644143   | 1          |
| GCA   | Ala        | 0.375          | 16.01651   | 0.30795              | 0.897349   | 1          |
| GCG   | Ala        | 0.12           | 0.167945   | 0.098522             | 0.009401   | 1          |
| GAT   | Asp        | 0.164625       | 0.439      | 0.432512             | 0.439      | 0.0024788  |
| GAC   | Asp        | 0.375          | 2.277904   | 0.985222             | 2.277907   | 0.0024788  |
| GAA   | Glu        | 0.5            | 3.125      | 0.862069             | 2.160493   | 0.3678794  |
| GAG   | Glu        | 0.16           | 0.32       | 0.399015             | 0.462857   | 0.3678794  |
| GGT   | Gly        | 0.2195         | 1.025509   | 0.432512             | 2.439044   | 1.13E-07   |
| GGC   | Gly        | 0.5            | 27.61096   | 0.985222             | 65.66945   | 1.13E-07   |
| GGA   | Gly        | 0.125          | 0.107855   | 0.184729             | 0.081165   | 4.14E-08   |
| GGG   | Gly        | 0.165          | 0.327444   | 0.182266             | 0.076922   | 1.88E-12   |
