# Supplementary material for: Essential Genes Embody Increased Mutational Robustness to Compensate for the Lack of Backup Genetic Redundancy
Source: PLoS One. 2016 Dec 20;11(12):e0168444. doi: 10.1371/journal.pone.0168444 (PMC5173180; doi:10.1371/journal.pone.0168444)
Supplement: S2 File — (XLSX) [file pone.0168444.s004.xlsx]

## Sheet: ess genes
YBL076C
YBR029C
YBR159W
YBR265W
YDL015C
YDL055C
YDL141W
YDR037W
YDR062W
YDR226W
YDR341C
YDR353W
YDR367W
YDR454C
YER026C
YFL022C
YFL045C
YGL245W
YGR094W
YGR185C
YGR264C
YHR019C
YHR020W
YIL078W
YJL097W
YKL004W
YKL067W
YLR060W
YMR296C
YNL247W
YNR016C
YOL097C
YOR168W
YPL160W
YPR033C
YPR113W
YPR183W

## Sheet: non-ess genes
YAL023C
YAL038W
YAL062W
YAR035W
YAR071W
YBL011W
YBL030C
YBL039C
YBL068W
YBR018C
YBR019C
YBR020W
YBR036C
YBR041W
YBR058C-A
YBR068C
YBR069C
YBR085W
YBR093C
YBR097W
YBR117C
YBR127C
YBR132C
YBR145W
YBR161W
YBR176W
YBR183W
YBR192W
YBR204C
YBR218C
YBR244W
YBR249C
YBR252W
YBR263W
YBR293W
YBR294W
YBR299W
YCL004W
YCL009C
YCL025C
YCL035C
YCL038C
YCL040W
YCL050C
YCL064C
YCR005C
YCR024C-A
YCR034W
YCR037C
YCR048W
YCR098C
YCR105W
YDL022W
YDL052C
YDL085W
YDL093W
YDL095W
YDL131W
YDL168W
YDL174C
YDL178W
YDL182W
YDL185W
YDL198C
YDL210W
YDL245C
YDL247W
YDR001C
YDR023W
YDR046C
YDR072C
YDR135C
YDR147W
YDR208W
YDR272W
YDR284C
YDR287W
YDR297W
YDR315C
YDR322C-A
YDR342C
YDR343C
YDR345C
YDR368W
YDR373W
YDR384C
YDR399W
YDR400W
YDR428C
YDR453C
YDR497C
YDR502C
YDR503C
YDR508C
YDR513W
YDR530C
YDR536W
YEL017C-A
YEL027W
YEL038W
YEL039C
YEL051W
YEL063C
YEL069C
YEL071W
YER005W
YER019W
YER024W
YER060W-A
YER062C
YER070W
YER073W
YER081W
YER086W
YER099C
YER152C
YER174C
YFL011W
YFL053W
YFL055W
YFR015C
YFR019W
YFR053C
YGL008C
YGL062W
YGL077C
YGL080W
YGL084C
YGL125W
YGL186C
YGL248W
YGL253W
YGL256W
YGR007W
YGR020C
YGR032W
YGR055W
YGR087C
YGR088W
YGR121C
YGR124W
YGR138C
YGR143W
YGR157W
YGR170W
YGR177C
YGR180C
YGR191W
YGR192C
YGR202C
YGR209C
YGR243W
YGR248W
YGR254W
YGR256W
YGR277C
YGR282C
YGR287C
YGR292W
YHL003C
YHL011C
YHL032C
YHL036W
YHR011W
YHR026W
YHR039C-A
YHR046C
YHR063C
YHR092C
YHR094C
YHR096C
YHR100C
YHR123W
YHR128W
YHR162W
YHR163W
YHR174W
YHR183W
YHR216W
YIL002C
YIL009W
YIL013C
YIL053W
YIL066C
YIL074C
YIL099W
YIL107C
YIL111W
YIL124W
YIL145C
YIL155C
YIR031C
YIR037W
YJL005W
YJL026W
YJL045W
YJL052W
YJL060W
YJL100W
YJL134W
YJL137C
YJL155C
YJL198W
YJL214W
YJL216C
YJL219W
YJR001W
YJR009C
YJR010W
YJR019C
YJR048W
YJR077C
YJR078W
YJR103W
YJR109C
YJR110W
YJR143C
YJR158W
YJR160C
YKL008C
YKL026C
YKL035W
YKL080W
YKL094W
YKL120W
YKL127W
YKL140W
YKL146W
YKL148C
YKL181W
YKL188C
YKL212W
YKR031C
YKR039W
YKR053C
YKR058W
YKR080W
YKR089C
YKR097W
YLL012W
YLL015W
YLL028W
YLL052C
YLL062C
YLR017W
YLR020C
YLR028C
YLR043C
YLR044C
YLR081W
YLR089C
YLR092W
YLR133W
YLR134W
YLR146C
YLR153C
YLR180W
YLR231C
YLR240W
YLR258W
YLR260W
YLR300W
YLR305C
YLR372W
YLR386W
YLR432W
YLR447C
YLR450W
YML004C
YML022W
YML056C
YML059C
YML070W
YML075C
YML106W
YML123C
YMR008C
YMR009W
YMR011W
YMR020W
YMR054W
YMR056C
YMR083W
YMR105C
YMR120C
YMR145C
YMR165C
YMR169C
YMR246W
YMR250W
YMR261C
YMR271C
YMR272C
YMR278W
YMR289W
YMR298W
YMR313C
YMR318C
YNL052W
YNL101W
YNL106C
YNL142W
YNL169C
YNL267W
YNL268W
YNL270C
YNL318C
YNL325C
YNR001C
YNR008W
YNR013C
YNR019W
YNR033W
YNR067C
YNR072W
YOL011W
YOL020W
YOL055C
YOL061W
YOL065C
YOL086C
YOL136C
YOL151W
YOL156W
YOR081C
YOR100C
YOR108W
YOR109W
YOR126C
YOR171C
YOR175C
YOR190W
YOR222W
YOR245C
YOR270C
YOR273C
YOR303W
YOR311C
YOR321W
YOR332W
YOR347C
YOR348C
YOR360C
YOR375C
YOR377W
YPL023C
YPL036W
YPL057C
YPL087W
YPL091W
YPL092W
YPL110C
YPL134C
YPL147W
YPL148C
YPL189W
YPL206C
YPL214C
YPL234C
YPL258C
YPL265W
YPL273W
YPR001W
YPR020W
YPR026W
YPR069C
YPR074C
YPR081C
YPR121W
YPR138C
YPR140W
YPR145W
YPR156C
YPR159W
YPR160W
YPR184W
YPR192W

## Sheet: ess rxns
1,3-beta-glucan synthase
1,6-beta-glucan synthase
3-dehydrosphinganine reductase
acetyl-CoA carboxylase, reaction
acetyl-CoA synthetase
adenylate kinase
alanyl-tRNA synthetase
arginyl-tRNA synthetase
Asparaginyl-tRNA synthetase
Aspartyl-tRNA synthetase
cysteinyl-tRNA synthetase
dolichyl-phosphate D-mannosyltransferase
dolichyl-phosphate-mannose--protein mannosyltransferase
glutaminyl-tRNA synthetase
glutamyl-tRNA synthetase
glycogen (starch) synthase
glycyl-tRNA synthetase
histidyl-tRNA synthetase
isoleucyl-tRNA synthetase
leucyl-tRNA synthetase
lysyl-tRNA synthetase
mannose-1-phosphate guanylyltransferase
methionyl-tRNA synthetase
nucleoside diphosphate kinase
nucleoside-diphosphate kinase (ATP:UDP)
phenylalanyl-tRNA synthetase
phosphomannomutase
prolyl-tRNA synthetase
serine palmitotransferase
seryl-tRNA synthetase
thioredoxin reductase (NADPH)
threonyl-tRNA synthetase
tryptophanyl-tRNA synthetase
tyrosyl-tRNA synthetase
valyl-tRNA synthetase
sulfate uniport
elongase II or III (3-oxoicosanoyl-CoA)
elongase II or III (3-oxodocosanoyl-CoA)
elongase II or III (3-oxotetracosanoyl-CoA)
B-ketoacyl-CoA reductase (3-hydroxyicosanoyl-CoA)
B-ketoacyl-CoA reductase (3-hydroxydocosanoyl-CoA)
B-ketoacyl-CoA reductase (3-hydroxytetracosanoyl-CoA)
B-hydroxyacyl-CoA dehydratase (trans-icos-2-enoyl-CoA)
B-hydroxyacyl-CoA dehydratase (trans-docos-2-enoyl-CoA)
B-hydroxyacyl-CoA dehydratase (trans-tetracos-2-enoyl-CoA)
trans-2-enoyl-CoA reductase (n-C20:0CoA)
trans-2-enoyl-CoA reductase (n-C22:0CoA)
trans-2-enoyl-CoA reductase (n-C24:0CoA)

## Sheet: non-ess rxns
(R)-lactate:ferricytochrome-c 2-oxidoreductase
(R)-lactate:ferricytochrome-c 2-oxidoreductase
2,3-diketo-5-methylthio-1-phosphopentane degradation reaction
2-dehydropantoate 2-reductase
3',5'-cyclic-nucleotide phosphodiesterase
3-deoxy-D-arabino-heptulosonate 7-phosphate synthetase
3-methyl-2-oxobutanoate hydroxymethyltransferase
4-amino-4-deoxychorismate synthase
4-aminobenzoate synthase
4PP-IP5 depyrophosphorylation to IP6
4PP-IP5 pyrophosphorylation to 4,5-PP2-IP4
5'-methylthioadenosine phosphorylase
5'-nucleotidase (CMP)
5-diphosphoinositol-1,2,3,4,6-pentakisphosphate synthase
5PP-IP5 pyrophosphorylation to 4,5-PP2-IP4
5PP-IP5 pyrophosphorylation to 5,6-PP2-IP4
6-phosphofructo-2-kinase
6PP-IP5 depyrophosphorylation to IP6
6PP-IP5 pyrophosphorylation to 5,6-PP2-IP4
acetyl-CoA C-acyltransferase (tetracosanoyl-CoA)
acetyl-CoA C-acetyltransferase
acetyl-CoA hydrolase
acyl carrier protein synthase
acyl-CoA oxidase (hexacosanoyl-CoA)
acyl-CoA:sterol acyltransferase (oleoyl-CoA:episterol), ER membrane
acyl-CoA:sterol acyltransferase (oleoyl-CoA:fecosterol), ER membrane
acyl-CoA:sterol acyltransferase (oleoyl-CoA:lanosterol), ER membrane
acyl-CoA:sterol acyltransferase (oleoyl-CoA:zymosterol), ER membrane
acyl-CoA:sterol acyltransferase (palmitoleoyl-CoA:episterol), ER membrane
acyl-CoA:sterol acyltransferase (palmitoleoyl-CoA:fecosterol), ER membrane
acyl-CoA:sterol acyltransferase (palmitoleoyl-CoA:lanosterol), ER membrane
acyl-CoA:sterol acyltransferase (palmitoleoyl-CoA:zymosterol), ER membrane
adenine deaminase
adenine phosphoribosyltransferase
adenosine deaminase
adenosine hydrolase
adenosylmethionine decarboxylase
adenylate cyclase
adenylate kinase (GTP)
alcohol acetyltransferase (2-methylbutanol)
alcohol acetyltransferase (ethanol)
alcohol acetyltransferase (isoamyl alcohol)
alcohol acetyltransferase (isobutyl alcohol)
alcohol acetyltransferase (phenylethanol alcohol)
aldehyde dehydrogenase (2-methylbutanol, NADP)
aldehyde dehydrogenase (2-phenylethanol, NADP)
aldehyde dehydrogenase (3-aminopropanal, NAD)
aldehyde dehydrogenase (isoamyl alcohol, NADP)
aldehyde dehydrogenase (isobutyl alcohol, NADP)
alpha,alpha-trehalase
alpha,alpha-trehalase
Ap4A hydrolase
ATP adenylyltransferase
ATPase, cytosolic
carnitine O-acetyltransferase
catalase
ceramide-1 hydroxylase (24C)
ceramide-1 hydroxylase (24C)
ceramide-1 hydroxylase (26C)
ceramide-1 hydroxylase (26C)
ceramide-1 synthase (24C)
ceramide-1 synthase (26C)
ceramide-2 synthase (24C)
ceramide-2 synthase (26C)
ceramide-3 synthase (24C)
ceramide-3 synthase (26C)
ceramide-4 synthase (24C)
ceramide-4 synthase (26C)
choline kinase
choline phosphate cytididyltransferase
citrate synthase, peroxisomal
citrate to cis-aconitate(3-), cytoplasmic
CTP synthase (glutamine)
CTP synthase (NH3)
cysteine synthase
dCTP deaminase
deoxyadenosine deaminase
deoxyguanylate kinase (dGMP:ATP)
dihydoorotic acid (ubiquinone-6)
dihydoorotic acid dehydrogenase
dihydroceramidase
dihydroceramidase
dihydroceramidase
dihydroceramidase
diphosphoinositol-1,3,4,6-tetrakisphosphate diphosphohydrolase
diphosphoinositol-1,3,4,6-tetrakisphosphate synthase
dUTP diphosphatase
ethanolamine kinase
ethyl acetate-hydrolyzing esterase
fructose-2,6-bisphosphate 2-phosphatase
galactokinase
galactose-1-phosphate uridylyltransferase
glucan 1,4-alpha-glucosidase
glucan 1,4-alpha-glucosidase, vacuole
glutamate decarboxylase
glutathione oxidoreductase
glutathione peridoxase
glycerol kinase
glycerol-3-phosphate dehydrogenase (fad)
glycerol-3-phosphate dehydrogenase (NAD)
glycerophosphodiester phosphodiesterase (glycerophosphocholine)
glycine cleavage system
glycine hydroxymethyltransferase
glycine-cleavage complex (lipoamide)
glycine-cleavage system (lipoamide)
glycogen phosphorylase
gnnuc
guanine phosphoribosyltransferase
guanylate kinase
guanylate kinase (GMP:dATP)
hexokinase (D-mannose:ATP)
hydrogen peroxide reductase (thioredoxin)
hydroxyacylglutathione hydrolase
hydroxyethylthiazole kinase
hydroxymethylglutaryl CoA synthase
hydroxymethylpyrimidine kinase (ATP)
hypoxanthine phosphoribosyltransferase (Hypoxanthine)
inositol-1,3,4,5,6-pentakisphosphate 2-kinase
IPS phospholipase C
IPS phospholipase C
IPS phospholipase C
IPS phospholipase C
IPS phospholipase C
IPS phospholipase C
IPS phospholipase C
IPS phospholipase C
IPS phospholipase C
IPS phospholipase C
isoamyl acetate-hydrolyzing esterase
isobutyl acetate-hydrolyzing esterase
kynureninase
L-1-pyrroline-3-hydroxy-5-carboxylate dehydrogenase
L-4-hydroxyglutamate semialdehyde dehydrogenase
L-alanine transaminase
L-lactaldehyde:NADP+ 1-oxidoreductase
L-serine deaminase
L-threonine deaminase
L-threonine deaminase
L-tryptophan:oxygen 2,3-oxidoreductase (decyclizing)
lactoylglutathione lyase
malate synthase
methylenetetrahydrofolate dehydrogenase (NAD)
mevalonate kinase (atp)
mevalonate kinase (ctp)
mevalonate kinase (gtp)
mevalonate kinase (UTP)
MIPC synthase
MIPC synthase
MIPC synthase
MIPC synthase
MIPC synthase
MIPC synthase
MIPC synthase
MIPC synthase
MIPC synthase
MIPC synthase
N-formyl-L-kynurenine amidohydrolase
NADH dehydrogenase, cytosolic/mitochondrial
nucleoside diphosphatase
nucleoside diphosphatase
nucleoside diphosphatase
nucleoside diphosphatase
nucleoside diphosphatase
nucleoside diphosphate kinase
nucleoside diphosphate kinase
nucleoside diphosphate kinase
nucleoside diphosphate kinase
nucleoside diphosphate kinase
nucleoside diphosphate kinase
nucleoside triphosphatase
nucleoside triphosphatase
nucleoside triphosphatase
nucleoside triphosphatase
pantetheine-phosphate adenylyltransferase
pantothenate synthase
peroxisomal acyl-CoA thioesterase
peroxisomal acyl-CoA thioesterase
peroxisomal acyl-CoA thioesterase
peroxisomal acyl-CoA thioesterase
peroxisomal acyl-CoA thioesterase
peroxisomal acyl-CoA thioesterase
phosphoenolpyruvate carboxykinase
phosphoethanolamine cytidyltransferase
phosphofructokinase
phosphofructokinase (s7p)
phosphomethylpyrimidine kinase
phytoceramidase
phytoceramidase
phytosphingosine synthesis
poylamine oxidase
purine-nucleoside phosphorylase (deoxyadenosine)
pyruvate decarboxylase (acetoin-forming)
reduced glutathione via ABC system
ribonucleoside-triphosphate reductase (ATP)
ribonucleoside-triphosphate reductase (CTP)
ribonucleoside-triphosphate reductase (GTP)
ribonucleoside-triphosphate reductase (UTP)
ribonucleotide reductase
ribonucleotide reductase
spermidine synthase
spermine synthase
sphingoid base-phosphate phosphatase (phytosphingosine 1-phosphate)
sphingoid base-phosphate phosphatase (sphinganine 1-phosphatase)
sphingolipid long chain base kinase (phytosphingosine)
sphingolipid long chain base kinase (sphinganine)
sulfate adenylyltransferase
sulfate adenylyltransferase (ADP)
tetrahydrofolate aminomethyltransferase
thiamine-phosphate diphosphorylase
tryptophan transaminase
UDPglucose 4-epimerase
UDPglucose--hexose-1-phosphate uridylyltransferase
uracil phosphoribosyltransferase
uridine kinase (ATP:uridine)
uridine kinase (GTP:uridine)
uridylate kinase (dUMP)
uridylate kinase (dUMP)
UTP-glucose-1-phosphate uridylyltransferase
V-ATPase, Golgi
V-ATPase, vacuole
aspartate-glutamate transporter
carnithine-acetylcarnithine carrier
choline transport
CTP transport
CTP/CMP antiport
D-galactose transport
D-mannose transport
ergosterol transport
glutathione transport
glycero-3-phospho-1-inositol transport
glycero-3-phosphocholine transport
GTP/GDP translocase
inositol transport
L-asparagine transport
L-aspartate transport
L-glutamine transport
L-glutamine transport
L-isoleucine transport
L-isoleucine transport
L-isoleucine transport
L-leucine transport, vacuoluar
L-leucine transport, vacuoluar
L-leucine transport, vacuoluar
L-tyrosine transport
L-tyrosine transport
L-tyrosine transport
malate transport
oxaloacetate transport
pantothenate transport
spermine transport
sulfite transport
pyruvate transport
tryptophan transaminase
fatty-acyl-CoA synthase (n-C18:0CoA)
elongase II (3-oxooctadecanoyl-CoA)
elongase III (3-oxohexacosanoyl-CoA)
B-ketoacyl-CoA reductase (3-hydroxyoctadecanoyl-CoA)
B-ketoacyl-CoA reductase ((S)-3-hydroxyhexacosanoyl-CoA)
B-hydroxyacyl-CoA dehydratase (trans-octadec-2-enoyl-CoA)
B-hydroxyacyl-CoA dehydratase (trans-hexacos-2-enoyl-CoA)
trans-2-enoyl-CoA reductase (n-C18:0CoA)
trans-2-enoyl-CoA reductase (n-C26:0CoA)
fatty-acid--CoA ligase (dodecanoate), ER membrane
fatty-acid--CoA ligase (tetradecanoate), ER membrane
fatty-acid--CoA ligase (hexadecanoate), ER membrane
fatty-acid--CoA ligase (hexadecenoate), ER membrane
fatty-acid--CoA ligase (octadecanoate), ER membrane
fatty-acid--CoA ligase (octadecenoate), ER membrane
fatty-acid--CoA ligase (dodecanoate), lipid particle
fatty-acid--CoA ligase (tetradecanoate), lipid particle
fatty-acid--CoA ligase (hexadecanoate), lipid particle
fatty-acid--CoA ligase (hexadecenoate), lipid particle
fatty-acid--CoA ligase (octadecanoate), lipid particle
fatty-acid--CoA ligase (octadecenoate), lipid particle
fatty-acid--CoA ligase (lignoceric acid), cell envelope
fatty-acid--CoA ligase (cerotic acid), cell envelope
fatty-acid--CoA ligase (lignoceric acid), ER membrane
fatty-acid--CoA ligase (cerotic acid), ER membrane
fatty-acid--CoA ligase (lignoceric acid), lipid particle
fatty-acid--CoA ligase (cerotic acid), lipid particle
fatty acyl-CoA transport via ABC system (C12:0)
fatty acyl-CoA transport via ABC system (C14:0)
fatty acyl-CoA transport via ABC system (C16:0)
fatty acyl-CoA transport via ABC system (C16:1)
fatty acyl-CoA transport via ABC system (C18:0)
fatty acyl-CoA transport via ABC system (C18:1)
fatty acyl-CoA transport via ABC system (C20:0)
fatty acyl-CoA transport via ABC system (C22:0)
fatty acyl-CoA transport via ABC system (C24:0)
fatty acyl-CoA transport via ABC system (C26:0)
peroxisomal acyl-CoA thioesterase (4:0)
peroxisomal acyl-CoA thioesterase (6:0)
peroxisomal acyl-CoA thioesterase (16:1)
peroxisomal acyl-CoA thioesterase (18:1)
acyl-CoA oxidase (icosanoyl-CoA)
acyl-CoA oxidase (docosanoyl-CoA)
acyl-CoA oxidase (tetracosanoyl-CoA)
2-enoyl-CoA hydratase (3-hydroxyhexacosanoyl-CoA)
2-enoyl-CoA hydratase (3-hydroxyicosanoyl-CoA)
2-enoyl-CoA hydratase (3-hydroxydocosanoyl-CoA)
2-enoyl-CoA hydratase (3-hydroxytetracosanoyl-CoA)
3-hydroxyacyl-CoA dehydrogenase (3-oxohexacosanoyl-CoA)
3-hydroxyacyl-CoA dehydrogenase (3-oxoicosanoyl-CoA)
3-hydroxyacyl-CoA dehydrogenase (3-oxodocosanoyl-CoA)
3-hydroxyacyl-CoA dehydrogenase (3-oxotetracosanoyl-CoA)
acetyl-CoA C-acyltransferase (stearoyl-CoA)
acetyl-CoA C-acyltransferase (icosanoyl-CoA)
acetyl-CoA C-acyltransferase (docosanoyl-CoA)
cis-aconitate(3-) to isocitrate
glycerol-3-phosphate acyltransferase (16:0), ER membrane
glycerol-3-phosphate acyltransferase (16:1), ER membrane
glycerol-3-phosphate acyltransferase (18:0), ER membrane
glycerol-3-phosphate acyltransferase (18:1), ER membrane
dihydroxyacetone phosphate acyltransferase (16:0), ER membrane
dihydroxyacetone phosphate acyltransferase (16:1), ER membrane
dihydroxyacetone phosphate acyltransferase (18:0), ER membrane
dihydroxyacetone phosphate acyltransferase (18:1), ER membrane
glycerol-3-phosphate acyltransferase (16:0), lipid particle
glycerol-3-phosphate acyltransferase (16:1), lipid particle
glycerol-3-phosphate acyltransferase (18:0), lipid particle
glycerol-3-phosphate acyltransferase (18:1), lipid particle
dihydroxyacetone phosphate acyltransferase (16:0), lipid particle
dihydroxyacetone phosphate acyltransferase (16:1), lipid particle
dihydroxyacetone phosphate acyltransferase (18:0), lipid particle
dihydroxyacetone phosphate acyltransferase (18:1), lipid particle
acyl dhap reductase (16:0), ER membrane
acyl dhap reductase (16:1), ER membrane
acyl dhap reductase (18:0), ER membrane
acyl dhap reductase (18:1), ER membrane
acyl dhap reductase (16:0), lipid particle
acyl dhap reductase (16:1), lipid particle
acyl dhap reductase (18:0), lipid particle
acyl dhap reductase (18:1), lipid particle
1-acyl-sn-glycerol-3-phosphate acyltransferase (1-16:0, 2-16:1), ER membrane
1-acyl-sn-glycerol-3-phosphate acyltransferase (1-16:0, 2-18:1), ER membrane
1-acyl-sn-glycerol-3-phosphate acyltransferase (1-16:1, 2-16:1), ER membrane
1-acyl-sn-glycerol-3-phosphate acyltransferase (1-16:1, 2-18:1), ER membrane
1-acyl-sn-glycerol-3-phosphate acyltransferase (1-18:0, 2-16:1), ER membrane
1-acyl-sn-glycerol-3-phosphate acyltransferase (1-18:0, 2-18:1), ER membrane
1-acyl-sn-glycerol-3-phosphate acyltransferase (1-18:1, 2-16:1), ER membrane
1-acyl-sn-glycerol-3-phosphate acyltransferase (1-18:1, 2-18:1), ER membrane
1-acyl-sn-glycerol-3-phosphate acyltransferase (1-16:0, 2-18:1), lipid particle
1-acyl-sn-glycerol-3-phosphate acyltransferase (1-16:1, 2-18:1), lipid particle
1-acyl-sn-glycerol-3-phosphate acyltransferase (1-18:0, 2-18:1), lipid particle
1-acyl-sn-glycerol-3-phosphate acyltransferase (1-18:1, 2-18:1), lipid particle
PA phosphatase (1-16:0, 2-16:1), ER membrane
PA phosphatase (1-16:0, 2-18:1), ER membrane
PA phosphatase (1-16:1, 2-16:1), ER membrane
PA phosphatase (1-16:1, 2-18:1), ER membrane
PA phosphatase (1-18:0, 2-16:1), ER membrane
PA phosphatase (1-18:0, 2-18:1), ER membrane
PA phosphatase (1-18:1, 2-16:1), ER membrane
PA phosphatase (1-18:1, 2-18:1), ER membrane
PA phosphatase (1-16:0, 2-16:1), Golgi membrane
PA phosphatase (1-16:0, 2-18:1), Golgi membrane
PA phosphatase (1-16:1, 2-16:1), Golgi membrane
PA phosphatase (1-16:1, 2-18:1), Golgi membrane
PA phosphatase (1-18:0, 2-16:1), Golgi membrane
PA phosphatase (1-18:0, 2-18:1), Golgi membrane
PA phosphatase (1-18:1, 2-16:1), Golgi membrane
PA phosphatase (1-18:1, 2-18:1), Golgi membrane
diacylglycerol acyltransferase (1-16:0, 2-16:1, 3-16:0), ER membrane
diacylglycerol acyltransferase (1-16:0, 2-18:1, 3-16:0), ER membrane
diacylglycerol acyltransferase (1-16:1, 2-16:1, 3-16:0), ER membrane
diacylglycerol acyltransferase (1-16:1, 2-18:1, 3-16:0), ER membrane
diacylglycerol acyltransferase (1-18:0, 2-16:1, 3-16:0), ER membrane
diacylglycerol acyltransferase (1-18:0, 2-18:1, 3-16:0), ER membrane
diacylglycerol acyltransferase (1-18:1, 2-16:1, 3-16:0), ER membrane
diacylglycerol acyltransferase (1-18:1, 2-18:1, 3-16:0), ER membrane
diacylglycerol acyltransferase (1-16:0, 2-16:1, 3-16:1), ER membrane
diacylglycerol acyltransferase (1-16:0, 2-18:1, 3-16:1), ER membrane
diacylglycerol acyltransferase (1-16:1, 2-16:1, 3-16:1), ER membrane
diacylglycerol acyltransferase (1-16:1, 2-18:1, 3-16:1), ER membrane
diacylglycerol acyltransferase (1-18:0, 2-16:1, 3-16:1), ER membrane
diacylglycerol acyltransferase (1-18:0, 2-18:1, 3-16:1), ER membrane
diacylglycerol acyltransferase (1-18:1, 2-16:1, 3-16:1), ER membrane
diacylglycerol acyltransferase (1-18:1, 2-18:1, 3-16:1), ER membrane
diacylglycerol acyltransferase (1-16:0, 2-16:1, 3-18:0), ER membrane
diacylglycerol acyltransferase (1-16:0, 2-18:1, 3-18:0), ER membrane
diacylglycerol acyltransferase (1-16:1, 2-16:1, 3-18:0), ER membrane
diacylglycerol acyltransferase (1-16:1, 2-18:1, 3-18:0), ER membrane
diacylglycerol acyltransferase (1-18:0, 2-16:1, 3-18:0), ER membrane
diacylglycerol acyltransferase (1-18:0, 2-18:1, 3-18:0), ER membrane
diacylglycerol acyltransferase (1-18:1, 2-16:1, 3-18:0), ER membrane
diacylglycerol acyltransferase (1-18:1, 2-18:1, 3-18:0), ER membrane
diacylglycerol acyltransferase (1-16:0, 2-16:1, 3-18:1), ER membrane
diacylglycerol acyltransferase (1-16:0, 2-18:1, 3-18:1), ER membrane
diacylglycerol acyltransferase (1-16:1, 2-16:1, 3-18:1), ER membrane
diacylglycerol acyltransferase (1-16:1, 2-18:1, 3-18:1), ER membrane
diacylglycerol acyltransferase (1-18:0, 2-16:1, 3-18:1), ER membrane
diacylglycerol acyltransferase (1-18:0, 2-18:1, 3-18:1), ER membrane
diacylglycerol acyltransferase (1-18:1, 2-16:1, 3-18:1), ER membrane
diacylglycerol acyltransferase (1-18:1, 2-18:1, 3-18:1), ER membrane
diacylglycerol acyltransferase (1-16:0, 2-16:1, 3-16:0), lipid particle
diacylglycerol acyltransferase (1-16:0, 2-18:1, 3-16:0), lipid particle
diacylglycerol acyltransferase (1-16:1, 2-16:1, 3-16:0), lipid particle
diacylglycerol acyltransferase (1-16:1, 2-18:1, 3-16:0), lipid particle
diacylglycerol acyltransferase (1-18:0, 2-16:1, 3-16:0), lipid particle
diacylglycerol acyltransferase (1-18:0, 2-18:1, 3-16:0), lipid particle
diacylglycerol acyltransferase (1-18:1, 2-16:1, 3-16:0), lipid particle
diacylglycerol acyltransferase (1-18:1, 2-18:1, 3-16:0), lipid particle
diacylglycerol acyltransferase (1-16:0, 2-16:1, 3-16:1), lipid particle
diacylglycerol acyltransferase (1-16:0, 2-18:1, 3-16:1), lipid particle
diacylglycerol acyltransferase (1-16:1, 2-16:1, 3-16:1), lipid particle
diacylglycerol acyltransferase (1-16:1, 2-18:1, 3-16:1), lipid particle
diacylglycerol acyltransferase (1-18:0, 2-16:1, 3-16:1), lipid particle
diacylglycerol acyltransferase (1-18:0, 2-18:1, 3-16:1), lipid particle
diacylglycerol acyltransferase (1-18:1, 2-16:1, 3-16:1), lipid particle
diacylglycerol acyltransferase (1-18:1, 2-18:1, 3-16:1), lipid particle
diacylglycerol acyltransferase (1-16:0, 2-16:1, 3-18:0), lipid particle
diacylglycerol acyltransferase (1-16:0, 2-18:1, 3-18:0), lipid particle
diacylglycerol acyltransferase (1-16:1, 2-16:1, 3-18:0), lipid particle
diacylglycerol acyltransferase (1-16:1, 2-18:1, 3-18:0), lipid particle
diacylglycerol acyltransferase (1-18:0, 2-16:1, 3-18:0), lipid particle
diacylglycerol acyltransferase (1-18:0, 2-18:1, 3-18:0), lipid particle
diacylglycerol acyltransferase (1-18:1, 2-16:1, 3-18:0), lipid particle
diacylglycerol acyltransferase (1-18:1, 2-18:1, 3-18:0), lipid particle
diacylglycerol acyltransferase (1-16:0, 2-16:1, 3-18:1), lipid particle
diacylglycerol acyltransferase (1-16:0, 2-18:1, 3-18:1), lipid particle
diacylglycerol acyltransferase (1-16:1, 2-16:1, 3-18:1), lipid particle
diacylglycerol acyltransferase (1-16:1, 2-18:1, 3-18:1), lipid particle
diacylglycerol acyltransferase (1-18:0, 2-16:1, 3-18:1), lipid particle
diacylglycerol acyltransferase (1-18:0, 2-18:1, 3-18:1), lipid particle
diacylglycerol acyltransferase (1-18:1, 2-16:1, 3-18:1), lipid particle
diacylglycerol acyltransferase (1-18:1, 2-18:1, 3-18:1), lipid particle
CDP-diacylglycerol synthase (1-16:0, 2-16:1), ER membrane
CDP-diacylglycerol synthase (1-16:1, 2-16:1), ER membrane
CDP-diacylglycerol synthase (1-18:0, 2-16:1), ER membrane
CDP-diacylglycerol synthase (1-18:1, 2-16:1), ER membrane
CDP-diacylglycerol synthase (1-16:0, 2-18:1), ER membrane
CDP-diacylglycerol synthase (1-16:1, 2-18:1), ER membrane
CDP-diacylglycerol synthase (1-18:0, 2-18:1), ER membrane
CDP-diacylglycerol synthase (1-18:1, 2-18:1), ER membrane
CDP-diacylglycerol synthase (1-16:0, 2-16:1), mitochondrial membrane
CDP-diacylglycerol synthase (1-16:1, 2-16:1), mitochondrial membrane
CDP-diacylglycerol synthase (1-18:0, 2-16:1), mitochondrial membrane
CDP-diacylglycerol synthase (1-18:1, 2-16:1), mitochondrial membrane
CDP-diacylglycerol synthase (1-16:0, 2-18:1), mitochondrial membrane
CDP-diacylglycerol synthase (1-16:1, 2-18:1), mitochondrial membrane
PS synthase (1-16:0, 2-16:1), ER membrane
PS synthase (1-16:1, 2-16:1), ER membrane
PS synthase (1-18:0, 2-16:1), ER membrane
PS synthase (1-18:1, 2-16:1), ER membrane
PS synthase (1-16:0, 2-18:1), ER membrane
PS synthase (1-16:1, 2-18:1), ER membrane
PS synthase (1-18:0, 2-18:1), ER membrane
PS synthase (1-18:1, 2-18:1), ER membrane
PI synthase (1-16:0, 2-16:1), ER membrane
PI synthase (1-16:1, 2-16:1), ER membrane
PI synthase (1-18:0, 2-16:1), ER membrane
PI synthase (1-18:1, 2-16:1), ER membrane
PI synthase (1-16:0, 2-18:1), ER membrane
PI synthase (1-16:1, 2-18:1), ER membrane
PI synthase (1-18:0, 2-18:1), ER membrane
PI synthase (1-18:1, 2-18:1), ER membrane
PS decarboxylase (1-16:0, 2-16:1), mitochondrial membrane
PS decarboxylase (1-16:1, 2-16:1), mitochondrial membrane
PS decarboxylase (1-18:0, 2-16:1), mitochondrial membrane
PS decarboxylase (1-18:1, 2-16:1), mitochondrial membrane
PS decarboxylase (1-16:0, 2-18:1), mitochondrial membrane
PS decarboxylase (1-16:1, 2-18:1), mitochondrial membrane
PS decarboxylase (1-18:0, 2-18:1), mitochondrial membrane
PS decarboxylase (1-18:1, 2-18:1), mitochondrial membrane
PS decarboxylase (1-16:0, 2-16:1), Golgi membrane
PS decarboxylase (1-16:1, 2-16:1), Golgi membrane
PS decarboxylase (1-18:0, 2-16:1), Golgi membrane
PS decarboxylase (1-18:1, 2-16:1), Golgi membrane
PS decarboxylase (1-16:0, 2-18:1), Golgi membrane
PS decarboxylase (1-16:1, 2-18:1), Golgi membrane
PS decarboxylase (1-18:0, 2-18:1), Golgi membrane
PS decarboxylase (1-18:1, 2-18:1), Golgi membrane
PS decarboxylase (1-16:0, 2-16:1), vacuolar membrane
PS decarboxylase (1-16:1, 2-16:1), vacuolar membrane
PS decarboxylase (1-18:0, 2-16:1), vacuolar membrane
PS decarboxylase (1-18:1, 2-16:1), vacuolar membrane
PS decarboxylase (1-16:0, 2-18:1), vacuolar membrane
PS decarboxylase (1-16:1, 2-18:1), vacuolar membrane
PS decarboxylase (1-18:0, 2-18:1), vacuolar membrane
PS decarboxylase (1-18:1, 2-18:1), vacuolar membrane
PE methyltransferase (1-16:0, 2-16:1), ER membrane
PE methyltransferase (1-16:1, 2-16:1), ER membrane
PE methyltransferase (1-18:0, 2-16:1), ER membrane
PE methyltransferase (1-18:1, 2-16:1), ER membrane
PE methyltransferase (1-16:0, 2-18:1), ER membrane
PE methyltransferase (1-16:1, 2-18:1), ER membrane
PE methyltransferase (1-18:0, 2-18:1), ER membrane
PE methyltransferase (1-18:1, 2-18:1), ER membrane
phosphatidyl-N-methylethanolamine methyltransferase (1-16:0, 2-16:1), ER membrane
phosphatidyl-N-methylethanolamine methyltransferase (1-16:1, 2-16:1), ER membrane
phosphatidyl-N-methylethanolamine methyltransferase (1-18:0, 2-16:1), ER membrane
phosphatidyl-N-methylethanolamine methyltransferase (1-18:1, 2-16:1), ER membrane
phosphatidyl-N-methylethanolamine methyltransferase (1-16:0, 2-18:1), ER membrane
phosphatidyl-N-methylethanolamine methyltransferase (1-16:1, 2-18:1), ER membrane
phosphatidyl-N-methylethanolamine methyltransferase (1-18:0, 2-18:1), ER membrane
phosphatidyl-N-methylethanolamine methyltransferase (1-18:1, 2-18:1), ER membrane
phosphatidyl-N,N-dimethylethanolamine methyltransferase (1-16:0, 2-16:1), ER membrane
phosphatidyl-N,N-dimethylethanolamine methyltransferase (1-16:1, 2-16:1), ER membrane
phosphatidyl-N,N-dimethylethanolamine methyltransferase (1-18:0, 2-16:1), ER membrane
phosphatidyl-N,N-dimethylethanolamine methyltransferase (1-18:1, 2-16:1), ER membrane
phosphatidyl-N,N-dimethylethanolamine methyltransferase (1-16:0, 2-18:1), ER membrane
phosphatidyl-N,N-dimethylethanolamine methyltransferase (1-16:1, 2-18:1), ER membrane
phosphatidyl-N,N-dimethylethanolamine methyltransferase (1-18:0, 2-18:1), ER membrane
phosphatidyl-N,N-dimethylethanolamine methyltransferase (1-18:1, 2-18:1), ER membrane
DAG kinase (1-16:0, 2-16:1), ER membrane
DAG kinase (1-16:1, 2-16:1), ER membrane
DAG kinase (1-18:0, 2-16:1), ER membrane
DAG kinase (1-18:1, 2-16:1), ER membrane
DAG kinase (1-16:0, 2-18:1), ER membrane
DAG kinase (1-16:1, 2-18:1), ER membrane
DAG kinase (1-18:0, 2-18:1), ER membrane
DAG kinase (1-18:1, 2-18:1), ER membrane
ethanolaminephosphotransferase (1-16:0, 2-16:1), ER membrane
ethanolaminephosphotransferase (1-16:1, 2-16:1), ER membrane
ethanolaminephosphotransferase (1-18:0, 2-16:1), ER membrane
ethanolaminephosphotransferase (1-18:1, 2-16:1), ER membrane
ethanolaminephosphotransferase (1-16:0, 2-18:1), ER membrane
ethanolaminephosphotransferase (1-16:1, 2-18:1), ER membrane
ethanolaminephosphotransferase (1-18:0, 2-18:1), ER membrane
ethanolaminephosphotransferase (1-18:1, 2-18:1), ER membrane
cholinephosphotransferase (1-16:0, 2-16:1), ER membrane
cholinephosphotransferase (1-16:1, 2-16:1), ER membrane
cholinephosphotransferase (1-18:0, 2-16:1), ER membrane
cholinephosphotransferase (1-18:1, 2-16:1), ER membrane
cholinephosphotransferase (1-16:0, 2-18:1), ER membrane
cholinephosphotransferase (1-16:1, 2-18:1), ER membrane
cholinephosphotransferase (1-18:0, 2-18:1), ER membrane
cholinephosphotransferase (1-18:1, 2-18:1), ER membrane
phosphatidylglycerolphosphate synthase (1-16:0, 2-16:1), mitochondrial membrane
phosphatidylglycerolphosphate synthase (1-16:1, 2-16:1), mitochondrial membrane
phosphatidylglycerolphosphate synthase (1-18:0, 2-16:1), mitochondrial membrane
phosphatidylglycerolphosphate synthase (1-18:1, 2-16:1), mitochondrial membrane
phosphatidylglycerolphosphate synthase (1-16:0, 2-18:1), mitochondrial membrane
phosphatidylglycerolphosphate synthase (1-16:1, 2-18:1), mitochondrial membrane
PGP phosphatase (1-16:0, 2-16:1), mitochondrial membrane
PGP phosphatase (1-16:1, 2-16:1), mitochondrial membrane
PGP phosphatase (1-18:0, 2-16:1), mitochondrial membrane
PGP phosphatase (1-18:1, 2-16:1), mitochondrial membrane
PGP phosphatase (1-16:0, 2-18:1), mitochondrial membrane
PGP phosphatase (1-16:1, 2-18:1), mitochondrial membrane
MLCL (2-16:1, 3-16:0, 4-16:1):PC (1-16:0, 2-16:1) acyltransferase, mitochondrial membrane
MLCL (2-16:1, 3-16:0, 4-16:1):PC (1-16:1, 2-16:1) acyltransferase, mitochondrial membrane
MLCL (2-16:1, 3-16:0, 4-16:1):PC (1-18:0, 2-16:1) acyltransferase, mitochondrial membrane
MLCL (2-16:1, 3-16:0, 4-16:1):PC (1-18:1, 2-16:1) acyltransferase, mitochondrial membrane
MLCL (2-16:1, 3-16:0, 4-16:1):PC (1-16:0, 2-18:1) acyltransferase, mitochondrial membrane
MLCL (2-16:1, 3-16:0, 4-16:1):PC (1-16:1, 2-18:1) acyltransferase, mitochondrial membrane
MLCL (2-16:1, 3-16:0, 4-16:1):PC (1-18:0, 2-18:1) acyltransferase, mitochondrial membrane
MLCL (2-16:1, 3-16:0, 4-16:1):PC (1-18:1, 2-18:1) acyltransferase, mitochondrial membrane
MLCL (2-16:1, 3-16:1, 4-16:1):PC (1-16:0, 2-16:1) acyltransferase, mitochondrial membrane
MLCL (2-16:1, 3-16:1, 4-16:1):PC (1-16:1, 2-16:1) acyltransferase, mitochondrial membrane
MLCL (2-16:1, 3-16:1, 4-16:1):PC (1-18:0, 2-16:1) acyltransferase, mitochondrial membrane
MLCL (2-16:1, 3-16:1, 4-16:1):PC (1-18:1, 2-16:1) acyltransferase, mitochondrial membrane
MLCL (2-16:1, 3-16:1, 4-16:1):PC (1-16:0, 2-18:1) acyltransferase, mitochondrial membrane
MLCL (2-16:1, 3-16:1, 4-16:1):PC (1-16:1, 2-18:1) acyltransferase, mitochondrial membrane
MLCL (2-16:1, 3-16:1, 4-16:1):PC (1-18:0, 2-18:1) acyltransferase, mitochondrial membrane
MLCL (2-16:1, 3-16:1, 4-16:1):PC (1-18:1, 2-18:1) acyltransferase, mitochondrial membrane
MLCL (2-16:1, 3-18:0, 4-16:1):PC (1-16:0, 2-16:1) acyltransferase, mitochondrial membrane
MLCL (2-16:1, 3-18:0, 4-16:1):PC (1-16:1, 2-16:1) acyltransferase, mitochondrial membrane
MLCL (2-16:1, 3-18:0, 4-16:1):PC (1-18:0, 2-16:1) acyltransferase, mitochondrial membrane
MLCL (2-16:1, 3-18:0, 4-16:1):PC (1-18:1, 2-16:1) acyltransferase, mitochondrial membrane
MLCL (2-16:1, 3-18:0, 4-16:1):PC (1-16:0, 2-18:1) acyltransferase, mitochondrial membrane
MLCL (2-16:1, 3-18:0, 4-16:1):PC (1-16:1, 2-18:1) acyltransferase, mitochondrial membrane
MLCL (2-16:1, 3-18:0, 4-16:1):PC (1-18:0, 2-18:1) acyltransferase, mitochondrial membrane
MLCL (2-16:1, 3-18:0, 4-16:1):PC (1-18:1, 2-18:1) acyltransferase, mitochondrial membrane
MLCL (2-16:1, 3-18:1, 4-16:1):PC (1-16:0, 2-16:1) acyltransferase, mitochondrial membrane
MLCL (2-16:1, 3-18:1, 4-16:1):PC (1-16:1, 2-16:1) acyltransferase, mitochondrial membrane
MLCL (2-16:1, 3-18:1, 4-16:1):PC (1-18:0, 2-16:1) acyltransferase, mitochondrial membrane
MLCL (2-16:1, 3-18:1, 4-16:1):PC (1-18:1, 2-16:1) acyltransferase, mitochondrial membrane
MLCL (2-16:1, 3-18:1, 4-16:1):PC (1-16:0, 2-18:1) acyltransferase, mitochondrial membrane
MLCL (2-16:1, 3-18:1, 4-16:1):PC (1-16:1, 2-18:1) acyltransferase, mitochondrial membrane
MLCL (2-16:1, 3-18:1, 4-16:1):PC (1-18:0, 2-18:1) acyltransferase, mitochondrial membrane
MLCL (2-16:1, 3-18:1, 4-16:1):PC (1-18:1, 2-18:1) acyltransferase, mitochondrial membrane
MLCL (2-16:1, 3-16:0, 4-18:1):PC (1-16:0, 2-16:1) acyltransferase, mitochondrial membrane
MLCL (2-16:1, 3-16:0, 4-18:1):PC (1-16:1, 2-16:1) acyltransferase, mitochondrial membrane
MLCL (2-16:1, 3-16:0, 4-18:1):PC (1-18:0, 2-16:1) acyltransferase, mitochondrial membrane
MLCL (2-16:1, 3-16:0, 4-18:1):PC (1-18:1, 2-16:1) acyltransferase, mitochondrial membrane
MLCL (2-16:1, 3-16:0, 4-18:1):PC (1-16:0, 2-18:1) acyltransferase, mitochondrial membrane
MLCL (2-16:1, 3-16:0, 4-18:1):PC (1-16:1, 2-18:1) acyltransferase, mitochondrial membrane
MLCL (2-16:1, 3-16:0, 4-18:1):PC (1-18:0, 2-18:1) acyltransferase, mitochondrial membrane
MLCL (2-16:1, 3-16:0, 4-18:1):PC (1-18:1, 2-18:1) acyltransferase, mitochondrial membrane
MLCL (2-16:1, 3-16:1, 4-18:1):PC (1-16:0, 2-16:1) acyltransferase, mitochondrial membrane
MLCL (2-16:1, 3-16:1, 4-18:1):PC (1-16:1, 2-16:1) acyltransferase, mitochondrial membrane
MLCL (2-16:1, 3-16:1, 4-18:1):PC (1-18:0, 2-16:1) acyltransferase, mitochondrial membrane
MLCL (2-16:1, 3-16:1, 4-18:1):PC (1-18:1, 2-16:1) acyltransferase, mitochondrial membrane
MLCL (2-16:1, 3-16:1, 4-18:1):PC (1-16:0, 2-18:1) acyltransferase, mitochondrial membrane
MLCL (2-16:1, 3-16:1, 4-18:1):PC (1-16:1, 2-18:1) acyltransferase, mitochondrial membrane
MLCL (2-16:1, 3-16:1, 4-18:1):PC (1-18:0, 2-18:1) acyltransferase, mitochondrial membrane
MLCL (2-16:1, 3-16:1, 4-18:1):PC (1-18:1, 2-18:1) acyltransferase, mitochondrial membrane
MLCL (2-18:1, 3-16:0, 4-16:1):PC (1-16:0, 2-16:1) acyltransferase, mitochondrial membrane
MLCL (2-18:1, 3-16:0, 4-16:1):PC (1-16:1, 2-16:1) acyltransferase, mitochondrial membrane
MLCL (2-18:1, 3-16:0, 4-16:1):PC (1-18:0, 2-16:1) acyltransferase, mitochondrial membrane
MLCL (2-18:1, 3-16:0, 4-16:1):PC (1-18:1, 2-16:1) acyltransferase, mitochondrial membrane
MLCL (2-18:1, 3-16:0, 4-16:1):PC (1-16:0, 2-18:1) acyltransferase, mitochondrial membrane
MLCL (2-18:1, 3-16:0, 4-16:1):PC (1-16:1, 2-18:1) acyltransferase, mitochondrial membrane
MLCL (2-18:1, 3-16:0, 4-16:1):PC (1-18:0, 2-18:1) acyltransferase, mitochondrial membrane
MLCL (2-18:1, 3-16:0, 4-16:1):PC (1-18:1, 2-18:1) acyltransferase, mitochondrial membrane
MLCL (2-18:1, 3-16:1, 4-16:1):PC (1-16:0, 2-16:1) acyltransferase, mitochondrial membrane
MLCL (2-18:1, 3-16:1, 4-16:1):PC (1-16:1, 2-16:1) acyltransferase, mitochondrial membrane
MLCL (2-18:1, 3-16:1, 4-16:1):PC (1-18:0, 2-16:1) acyltransferase, mitochondrial membrane
MLCL (2-18:1, 3-16:1, 4-16:1):PC (1-18:1, 2-16:1) acyltransferase, mitochondrial membrane
MLCL (2-18:1, 3-16:1, 4-16:1):PC (1-16:0, 2-18:1) acyltransferase, mitochondrial membrane
MLCL (2-18:1, 3-16:1, 4-16:1):PC (1-16:1, 2-18:1) acyltransferase, mitochondrial membrane
MLCL (2-18:1, 3-16:1, 4-16:1):PC (1-18:0, 2-18:1) acyltransferase, mitochondrial membrane
MLCL (2-18:1, 3-16:1, 4-16:1):PC (1-18:1, 2-18:1) acyltransferase, mitochondrial membrane
MLCL (2-18:1, 3-18:0, 4-16:1):PC (1-16:0, 2-16:1) acyltransferase, mitochondrial membrane
MLCL (2-18:1, 3-18:0, 4-16:1):PC (1-16:1, 2-16:1) acyltransferase, mitochondrial membrane
MLCL (2-18:1, 3-18:0, 4-16:1):PC (1-18:0, 2-16:1) acyltransferase, mitochondrial membrane
MLCL (2-18:1, 3-18:0, 4-16:1):PC (1-18:1, 2-16:1) acyltransferase, mitochondrial membrane
MLCL (2-18:1, 3-18:0, 4-16:1):PC (1-16:0, 2-18:1) acyltransferase, mitochondrial membrane
MLCL (2-18:1, 3-18:0, 4-16:1):PC (1-16:1, 2-18:1) acyltransferase, mitochondrial membrane
MLCL (2-18:1, 3-18:0, 4-16:1):PC (1-18:0, 2-18:1) acyltransferase, mitochondrial membrane
MLCL (2-18:1, 3-18:0, 4-16:1):PC (1-18:1, 2-18:1) acyltransferase, mitochondrial membrane
MLCL (2-18:1, 3-18:1, 4-16:1):PC (1-16:0, 2-16:1) acyltransferase, mitochondrial membrane
MLCL (2-18:1, 3-18:1, 4-16:1):PC (1-16:1, 2-16:1) acyltransferase, mitochondrial membrane
MLCL (2-18:1, 3-18:1, 4-16:1):PC (1-18:0, 2-16:1) acyltransferase, mitochondrial membrane
MLCL (2-18:1, 3-18:1, 4-16:1):PC (1-18:1, 2-16:1) acyltransferase, mitochondrial membrane
MLCL (2-18:1, 3-18:1, 4-16:1):PC (1-16:0, 2-18:1) acyltransferase, mitochondrial membrane
MLCL (2-18:1, 3-18:1, 4-16:1):PC (1-16:1, 2-18:1) acyltransferase, mitochondrial membrane
MLCL (2-18:1, 3-18:1, 4-16:1):PC (1-18:0, 2-18:1) acyltransferase, mitochondrial membrane
MLCL (2-18:1, 3-18:1, 4-16:1):PC (1-18:1, 2-18:1) acyltransferase, mitochondrial membrane
MLCL (2-18:1, 3-16:0, 4-18:1):PC (1-16:0, 2-16:1) acyltransferase, mitochondrial membrane
MLCL (2-18:1, 3-16:0, 4-18:1):PC (1-16:1, 2-16:1) acyltransferase, mitochondrial membrane
MLCL (2-18:1, 3-16:0, 4-18:1):PC (1-18:0, 2-16:1) acyltransferase, mitochondrial membrane
MLCL (2-18:1, 3-16:0, 4-18:1):PC (1-18:1, 2-16:1) acyltransferase, mitochondrial membrane
MLCL (2-18:1, 3-16:0, 4-18:1):PC (1-16:0, 2-18:1) acyltransferase, mitochondrial membrane
MLCL (2-18:1, 3-16:0, 4-18:1):PC (1-16:1, 2-18:1) acyltransferase, mitochondrial membrane
MLCL (2-18:1, 3-16:0, 4-18:1):PC (1-18:0, 2-18:1) acyltransferase, mitochondrial membrane
MLCL (2-18:1, 3-16:0, 4-18:1):PC (1-18:1, 2-18:1) acyltransferase, mitochondrial membrane
MLCL (2-18:1, 3-16:1, 4-18:1):PC (1-16:0, 2-16:1) acyltransferase, mitochondrial membrane
MLCL (2-18:1, 3-16:1, 4-18:1):PC (1-16:1, 2-16:1) acyltransferase, mitochondrial membrane
MLCL (2-18:1, 3-16:1, 4-18:1):PC (1-18:0, 2-16:1) acyltransferase, mitochondrial membrane
MLCL (2-18:1, 3-16:1, 4-18:1):PC (1-18:1, 2-16:1) acyltransferase, mitochondrial membrane
MLCL (2-18:1, 3-16:1, 4-18:1):PC (1-16:0, 2-18:1) acyltransferase, mitochondrial membrane
MLCL (2-18:1, 3-16:1, 4-18:1):PC (1-16:1, 2-18:1) acyltransferase, mitochondrial membrane
MLCL (2-18:1, 3-16:1, 4-18:1):PC (1-18:0, 2-18:1) acyltransferase, mitochondrial membrane
MLCL (2-18:1, 3-16:1, 4-18:1):PC (1-18:1, 2-18:1) acyltransferase, mitochondrial membrane
MLCL (1-16:0, 2-16:1, 4-16:1):PC (1-16:0, 2-16:1) acyltransferase, mitochondrial membrane
MLCL (1-16:0, 2-16:1, 4-16:1):PC (1-16:1, 2-16:1) acyltransferase, mitochondrial membrane
MLCL (1-16:0, 2-16:1, 4-16:1):PC (1-18:0, 2-16:1) acyltransferase, mitochondrial membrane
MLCL (1-16:0, 2-16:1, 4-16:1):PC (1-18:1, 2-16:1) acyltransferase, mitochondrial membrane
MLCL (1-16:0, 2-16:1, 4-16:1):PC (1-16:0, 2-18:1) acyltransferase, mitochondrial membrane
MLCL (1-16:0, 2-16:1, 4-16:1):PC (1-16:1, 2-18:1) acyltransferase, mitochondrial membrane
MLCL (1-16:0, 2-16:1, 4-16:1):PC (1-18:0, 2-18:1) acyltransferase, mitochondrial membrane
MLCL (1-16:0, 2-16:1, 4-16:1):PC (1-18:1, 2-18:1) acyltransferase, mitochondrial membrane
MLCL (1-16:0, 2-16:1, 4-18:1):PC (1-16:0, 2-16:1) acyltransferase, mitochondrial membrane
MLCL (1-16:0, 2-16:1, 4-18:1):PC (1-16:1, 2-16:1) acyltransferase, mitochondrial membrane
MLCL (1-16:0, 2-16:1, 4-18:1):PC (1-18:0, 2-16:1) acyltransferase, mitochondrial membrane
MLCL (1-16:0, 2-16:1, 4-18:1):PC (1-18:1, 2-16:1) acyltransferase, mitochondrial membrane
MLCL (1-16:0, 2-16:1, 4-18:1):PC (1-16:0, 2-18:1) acyltransferase, mitochondrial membrane
MLCL (1-16:0, 2-16:1, 4-18:1):PC (1-16:1, 2-18:1) acyltransferase, mitochondrial membrane
MLCL (1-16:0, 2-16:1, 4-18:1):PC (1-18:0, 2-18:1) acyltransferase, mitochondrial membrane
MLCL (1-16:0, 2-16:1, 4-18:1):PC (1-18:1, 2-18:1) acyltransferase, mitochondrial membrane
MLCL (1-16:1, 2-16:1, 4-16:1):PC (1-16:0, 2-16:1) acyltransferase, mitochondrial membrane
MLCL (1-16:1, 2-16:1, 4-16:1):PC (1-16:1, 2-16:1) acyltransferase, mitochondrial membrane
MLCL (1-16:1, 2-16:1, 4-16:1):PC (1-18:0, 2-16:1) acyltransferase, mitochondrial membrane
MLCL (1-16:1, 2-16:1, 4-16:1):PC (1-18:1, 2-16:1) acyltransferase, mitochondrial membrane
MLCL (1-16:1, 2-16:1, 4-16:1):PC (1-16:0, 2-18:1) acyltransferase, mitochondrial membrane
MLCL (1-16:1, 2-16:1, 4-16:1):PC (1-16:1, 2-18:1) acyltransferase, mitochondrial membrane
MLCL (1-16:1, 2-16:1, 4-16:1):PC (1-18:0, 2-18:1) acyltransferase, mitochondrial membrane
MLCL (1-16:1, 2-16:1, 4-16:1):PC (1-18:1, 2-18:1) acyltransferase, mitochondrial membrane
MLCL (1-16:1, 2-16:1, 4-18:1):PC (1-16:0, 2-16:1) acyltransferase, mitochondrial membrane
MLCL (1-16:1, 2-16:1, 4-18:1):PC (1-16:1, 2-16:1) acyltransferase, mitochondrial membrane
MLCL (1-16:1, 2-16:1, 4-18:1):PC (1-18:0, 2-16:1) acyltransferase, mitochondrial membrane
MLCL (1-16:1, 2-16:1, 4-18:1):PC (1-18:1, 2-16:1) acyltransferase, mitochondrial membrane
MLCL (1-16:1, 2-16:1, 4-18:1):PC (1-16:0, 2-18:1) acyltransferase, mitochondrial membrane
MLCL (1-16:1, 2-16:1, 4-18:1):PC (1-16:1, 2-18:1) acyltransferase, mitochondrial membrane
MLCL (1-16:1, 2-16:1, 4-18:1):PC (1-18:0, 2-18:1) acyltransferase, mitochondrial membrane
MLCL (1-16:1, 2-16:1, 4-18:1):PC (1-18:1, 2-18:1) acyltransferase, mitochondrial membrane
MLCL (1-18:0, 2-16:1, 4-16:1):PC (1-16:0, 2-16:1) acyltransferase, mitochondrial membrane
MLCL (1-18:0, 2-16:1, 4-16:1):PC (1-16:1, 2-16:1) acyltransferase, mitochondrial membrane
MLCL (1-18:0, 2-16:1, 4-16:1):PC (1-18:0, 2-16:1) acyltransferase, mitochondrial membrane
MLCL (1-18:0, 2-16:1, 4-16:1):PC (1-18:1, 2-16:1) acyltransferase, mitochondrial membrane
MLCL (1-18:0, 2-16:1, 4-16:1):PC (1-16:0, 2-18:1) acyltransferase, mitochondrial membrane
MLCL (1-18:0, 2-16:1, 4-16:1):PC (1-16:1, 2-18:1) acyltransferase, mitochondrial membrane
MLCL (1-18:0, 2-16:1, 4-16:1):PC (1-18:0, 2-18:1) acyltransferase, mitochondrial membrane
MLCL (1-18:0, 2-16:1, 4-16:1):PC (1-18:1, 2-18:1) acyltransferase, mitochondrial membrane
MLCL (1-18:0, 2-16:1, 4-18:1):PC (1-16:0, 2-16:1) acyltransferase, mitochondrial membrane
MLCL (1-18:0, 2-16:1, 4-18:1):PC (1-16:1, 2-16:1) acyltransferase, mitochondrial membrane
MLCL (1-18:0, 2-16:1, 4-18:1):PC (1-18:0, 2-16:1) acyltransferase, mitochondrial membrane
MLCL (1-18:0, 2-16:1, 4-18:1):PC (1-18:1, 2-16:1) acyltransferase, mitochondrial membrane
MLCL (1-18:0, 2-16:1, 4-18:1):PC (1-16:0, 2-18:1) acyltransferase, mitochondrial membrane
MLCL (1-18:0, 2-16:1, 4-18:1):PC (1-16:1, 2-18:1) acyltransferase, mitochondrial membrane
MLCL (1-18:0, 2-16:1, 4-18:1):PC (1-18:0, 2-18:1) acyltransferase, mitochondrial membrane
MLCL (1-18:0, 2-16:1, 4-18:1):PC (1-18:1, 2-18:1) acyltransferase, mitochondrial membrane
MLCL (1-18:1, 2-16:1, 4-16:1):PC (1-16:0, 2-16:1) acyltransferase, mitochondrial membrane
MLCL (1-18:1, 2-16:1, 4-16:1):PC (1-16:1, 2-16:1) acyltransferase, mitochondrial membrane
MLCL (1-18:1, 2-16:1, 4-16:1):PC (1-18:0, 2-16:1) acyltransferase, mitochondrial membrane
MLCL (1-18:1, 2-16:1, 4-16:1):PC (1-18:1, 2-16:1) acyltransferase, mitochondrial membrane
MLCL (1-18:1, 2-16:1, 4-16:1):PC (1-16:0, 2-18:1) acyltransferase, mitochondrial membrane
MLCL (1-18:1, 2-16:1, 4-16:1):PC (1-16:1, 2-18:1) acyltransferase, mitochondrial membrane
MLCL (1-18:1, 2-16:1, 4-16:1):PC (1-18:0, 2-18:1) acyltransferase, mitochondrial membrane
MLCL (1-18:1, 2-16:1, 4-16:1):PC (1-18:1, 2-18:1) acyltransferase, mitochondrial membrane
MLCL (1-18:1, 2-16:1, 4-18:1):PC (1-16:0, 2-16:1) acyltransferase, mitochondrial membrane
MLCL (1-18:1, 2-16:1, 4-18:1):PC (1-16:1, 2-16:1) acyltransferase, mitochondrial membrane
MLCL (1-18:1, 2-16:1, 4-18:1):PC (1-18:0, 2-16:1) acyltransferase, mitochondrial membrane
MLCL (1-18:1, 2-16:1, 4-18:1):PC (1-18:1, 2-16:1) acyltransferase, mitochondrial membrane
MLCL (1-18:1, 2-16:1, 4-18:1):PC (1-16:0, 2-18:1) acyltransferase, mitochondrial membrane
MLCL (1-18:1, 2-16:1, 4-18:1):PC (1-16:1, 2-18:1) acyltransferase, mitochondrial membrane
MLCL (1-18:1, 2-16:1, 4-18:1):PC (1-18:0, 2-18:1) acyltransferase, mitochondrial membrane
MLCL (1-18:1, 2-16:1, 4-18:1):PC (1-18:1, 2-18:1) acyltransferase, mitochondrial membrane
MLCL (1-16:0, 2-18:1, 4-16:1):PC (1-16:0, 2-16:1) acyltransferase, mitochondrial membrane
MLCL (1-16:0, 2-18:1, 4-16:1):PC (1-16:1, 2-16:1) acyltransferase, mitochondrial membrane
MLCL (1-16:0, 2-18:1, 4-16:1):PC (1-18:0, 2-16:1) acyltransferase, mitochondrial membrane
MLCL (1-16:0, 2-18:1, 4-16:1):PC (1-18:1, 2-16:1) acyltransferase, mitochondrial membrane
MLCL (1-16:0, 2-18:1, 4-16:1):PC (1-16:0, 2-18:1) acyltransferase, mitochondrial membrane
MLCL (1-16:0, 2-18:1, 4-16:1):PC (1-16:1, 2-18:1) acyltransferase, mitochondrial membrane
MLCL (1-16:0, 2-18:1, 4-16:1):PC (1-18:0, 2-18:1) acyltransferase, mitochondrial membrane
MLCL (1-16:0, 2-18:1, 4-16:1):PC (1-18:1, 2-18:1) acyltransferase, mitochondrial membrane
MLCL (1-16:0, 2-18:1, 4-18:1):PC (1-16:0, 2-16:1) acyltransferase, mitochondrial membrane
MLCL (1-16:0, 2-18:1, 4-18:1):PC (1-16:1, 2-16:1) acyltransferase, mitochondrial membrane
MLCL (1-16:0, 2-18:1, 4-18:1):PC (1-18:0, 2-16:1) acyltransferase, mitochondrial membrane
MLCL (1-16:0, 2-18:1, 4-18:1):PC (1-18:1, 2-16:1) acyltransferase, mitochondrial membrane
MLCL (1-16:0, 2-18:1, 4-18:1):PC (1-16:0, 2-18:1) acyltransferase, mitochondrial membrane
MLCL (1-16:0, 2-18:1, 4-18:1):PC (1-16:1, 2-18:1) acyltransferase, mitochondrial membrane
MLCL (1-16:0, 2-18:1, 4-18:1):PC (1-18:0, 2-18:1) acyltransferase, mitochondrial membrane
MLCL (1-16:0, 2-18:1, 4-18:1):PC (1-18:1, 2-18:1) acyltransferase, mitochondrial membrane
MLCL (1-16:1, 2-18:1, 4-16:1):PC (1-16:0, 2-16:1) acyltransferase, mitochondrial membrane
MLCL (1-16:1, 2-18:1, 4-16:1):PC (1-16:1, 2-16:1) acyltransferase, mitochondrial membrane
MLCL (1-16:1, 2-18:1, 4-16:1):PC (1-18:0, 2-16:1) acyltransferase, mitochondrial membrane
MLCL (1-16:1, 2-18:1, 4-16:1):PC (1-18:1, 2-16:1) acyltransferase, mitochondrial membrane
MLCL (1-16:1, 2-18:1, 4-16:1):PC (1-16:0, 2-18:1) acyltransferase, mitochondrial membrane
MLCL (1-16:1, 2-18:1, 4-16:1):PC (1-16:1, 2-18:1) acyltransferase, mitochondrial membrane
MLCL (1-16:1, 2-18:1, 4-16:1):PC (1-18:0, 2-18:1) acyltransferase, mitochondrial membrane
MLCL (1-16:1, 2-18:1, 4-16:1):PC (1-18:1, 2-18:1) acyltransferase, mitochondrial membrane
MLCL (1-16:1, 2-18:1, 4-18:1):PC (1-16:0, 2-16:1) acyltransferase, mitochondrial membrane
MLCL (1-16:1, 2-18:1, 4-18:1):PC (1-16:1, 2-16:1) acyltransferase, mitochondrial membrane
MLCL (1-16:1, 2-18:1, 4-18:1):PC (1-18:0, 2-16:1) acyltransferase, mitochondrial membrane
MLCL (1-16:1, 2-18:1, 4-18:1):PC (1-18:1, 2-16:1) acyltransferase, mitochondrial membrane
MLCL (1-16:1, 2-18:1, 4-18:1):PC (1-16:0, 2-18:1) acyltransferase, mitochondrial membrane
MLCL (1-16:1, 2-18:1, 4-18:1):PC (1-16:1, 2-18:1) acyltransferase, mitochondrial membrane
MLCL (1-16:1, 2-18:1, 4-18:1):PC (1-18:0, 2-18:1) acyltransferase, mitochondrial membrane
MLCL (1-16:1, 2-18:1, 4-18:1):PC (1-18:1, 2-18:1) acyltransferase, mitochondrial membrane
phosphatidylinositol 4-kinase (1-16:0, 2-16:1), cell envelope
phosphatidylinositol 4-kinase (1-16:1, 2-16:1), cell envelope
phosphatidylinositol 4-kinase (1-18:0, 2-16:1), cell envelope
phosphatidylinositol 4-kinase (1-18:1, 2-16:1), cell envelope
phosphatidylinositol 4-kinase (1-16:0, 2-18:1), cell envelope
phosphatidylinositol 4-kinase (1-16:1, 2-18:1), cell envelope
phosphatidylinositol 4-kinase (1-18:0, 2-18:1), cell envelope
phosphatidylinositol 4-kinase (1-18:1, 2-18:1), cell envelope
phosphatidylinositol 4-kinase (1-16:0, 2-16:1), Golgi membrane
phosphatidylinositol 4-kinase (1-16:1, 2-16:1), Golgi membrane
phosphatidylinositol 4-kinase (1-18:0, 2-16:1), Golgi membrane
phosphatidylinositol 4-kinase (1-18:1, 2-16:1), Golgi membrane
phosphatidylinositol 4-kinase (1-16:0, 2-18:1), Golgi membrane
phosphatidylinositol 4-kinase (1-16:1, 2-18:1), Golgi membrane
phosphatidylinositol 4-kinase (1-18:0, 2-18:1), Golgi membrane
phosphatidylinositol 4-kinase (1-18:1, 2-18:1), Golgi membrane
phosphatidylinositol 4-kinase (1-16:0, 2-16:1), nucleus
phosphatidylinositol 4-kinase (1-16:1, 2-16:1), nucleus
phosphatidylinositol 4-kinase (1-18:0, 2-16:1), nucleus
phosphatidylinositol 4-kinase (1-18:1, 2-16:1), nucleus
phosphatidylinositol 4-kinase (1-16:0, 2-18:1), nucleus
phosphatidylinositol 4-kinase (1-16:1, 2-18:1), nucleus
phosphatidylinositol 4-kinase (1-18:0, 2-18:1), nucleus
phosphatidylinositol 4-kinase (1-18:1, 2-18:1), nucleus
phosphatidylinositol 3-kinase (1-16:0, 2-16:1), vacuolar membrane
phosphatidylinositol 3-kinase (1-16:1, 2-16:1), vacuolar membrane
phosphatidylinositol 3-kinase (1-18:0, 2-16:1), vacuolar membrane
phosphatidylinositol 3-kinase (1-18:1, 2-16:1), vacuolar membrane
phosphatidylinositol 3-kinase (1-16:0, 2-18:1), vacuolar membrane
phosphatidylinositol 3-kinase (1-16:1, 2-18:1), vacuolar membrane
phosphatidylinositol 3-kinase (1-18:0, 2-18:1), vacuolar membrane
phosphatidylinositol 3-kinase (1-18:1, 2-18:1), vacuolar membrane
PI 4-P 5-kinase (1-16:0, 2-16:1), nucleus
PI 4-P 5-kinase (1-16:1, 2-16:1), nucleus
PI 4-P 5-kinase (1-18:0, 2-16:1), nucleus
PI 4-P 5-kinase (1-18:1, 2-16:1), nucleus
PI 4-P 5-kinase (1-16:0, 2-18:1), nucleus
PI 4-P 5-kinase (1-16:1, 2-18:1), nucleus
PI 4-P 5-kinase (1-18:0, 2-18:1), nucleus
PI 4-P 5-kinase (1-18:1, 2-18:1), nucleus
PI 4-P 5-kinase (1-16:0, 2-16:1), cell envelope
PI 4-P 5-kinase (1-16:1, 2-16:1), cell envelope
PI 4-P 5-kinase (1-18:0, 2-16:1), cell envelope
PI 4-P 5-kinase (1-18:1, 2-16:1), cell envelope
PI 4-P 5-kinase (1-16:0, 2-18:1), cell envelope
PI 4-P 5-kinase (1-16:1, 2-18:1), cell envelope
PI 4-P 5-kinase (1-18:0, 2-18:1), cell envelope
PI 4-P 5-kinase (1-18:1, 2-18:1), cell envelope
PI 3-P 5-kinase (1-16:0, 2-16:1), vacuolar membrane
PI 3-P 5-kinase (1-16:1, 2-16:1), vacuolar membrane
PI 3-P 5-kinase (1-18:0, 2-16:1), vacuolar membrane
PI 3-P 5-kinase (1-18:1, 2-16:1), vacuolar membrane
PI 3-P 5-kinase (1-16:0, 2-18:1), vacuolar membrane
PI 3-P 5-kinase (1-16:1, 2-18:1), vacuolar membrane
PI 3-P 5-kinase (1-18:0, 2-18:1), vacuolar membrane
PI 3-P 5-kinase (1-18:1, 2-18:1), vacuolar membrane
PE (1-16:0, 2-16:1) diacylglycerol (1-16:0, 2-16:1) acyltransferase, ER membrane
PE (1-16:1, 2-16:1) diacylglycerol (1-16:0, 2-16:1) acyltransferase, ER membrane
PE (1-18:0, 2-16:1) diacylglycerol (1-16:0, 2-16:1) acyltransferase, ER membrane
PE (1-18:1, 2-16:1) diacylglycerol (1-16:0, 2-16:1) acyltransferase, ER membrane
PE (1-16:0, 2-18:1) diacylglycerol (1-16:0, 2-16:1) acyltransferase, ER membrane
PE (1-16:1, 2-18:1) diacylglycerol (1-16:0, 2-16:1) acyltransferase, ER membrane
PE (1-18:0, 2-18:1) diacylglycerol (1-16:0, 2-16:1) acyltransferase, ER membrane
PE (1-18:1, 2-18:1) diacylglycerol (1-16:0, 2-16:1) acyltransferase, ER membrane
PE (1-16:0, 2-16:1) diacylglycerol (1-16:1, 2-16:1) acyltransferase, ER membrane
PE (1-16:1, 2-16:1) diacylglycerol (1-16:1, 2-16:1) acyltransferase, ER membrane
PE (1-18:0, 2-16:1) diacylglycerol (1-16:1, 2-16:1) acyltransferase, ER membrane
PE (1-18:1, 2-16:1) diacylglycerol (1-16:1, 2-16:1) acyltransferase, ER membrane
PE (1-16:0, 2-18:1) diacylglycerol (1-16:1, 2-16:1) acyltransferase, ER membrane
PE (1-16:1, 2-18:1) diacylglycerol (1-16:1, 2-16:1) acyltransferase, ER membrane
PE (1-18:0, 2-18:1) diacylglycerol (1-16:1, 2-16:1) acyltransferase, ER membrane
PE (1-18:1, 2-18:1) diacylglycerol (1-16:1, 2-16:1) acyltransferase, ER membrane
PE (1-16:0, 2-16:1) diacylglycerol (1-18:0, 2-16:1) acyltransferase, ER membrane
PE (1-16:1, 2-16:1) diacylglycerol (1-18:0, 2-16:1) acyltransferase, ER membrane
PE (1-18:0, 2-16:1) diacylglycerol (1-18:0, 2-16:1) acyltransferase, ER membrane
PE (1-18:1, 2-16:1) diacylglycerol (1-18:0, 2-16:1) acyltransferase, ER membrane
PE (1-16:0, 2-18:1) diacylglycerol (1-18:0, 2-16:1) acyltransferase, ER membrane
PE (1-16:1, 2-18:1) diacylglycerol (1-18:0, 2-16:1) acyltransferase, ER membrane
PE (1-18:0, 2-18:1) diacylglycerol (1-18:0, 2-16:1) acyltransferase, ER membrane
PE (1-18:1, 2-18:1) diacylglycerol (1-18:0, 2-16:1) acyltransferase, ER membrane
PE (1-16:0, 2-16:1) diacylglycerol (1-18:1, 2-16:1) acyltransferase, ER membrane
PE (1-16:1, 2-16:1) diacylglycerol (1-18:1, 2-16:1) acyltransferase, ER membrane
PE (1-18:0, 2-16:1) diacylglycerol (1-18:1, 2-16:1) acyltransferase, ER membrane
PE (1-18:1, 2-16:1) diacylglycerol (1-18:1, 2-16:1) acyltransferase, ER membrane
PE (1-16:0, 2-18:1) diacylglycerol (1-18:1, 2-16:1) acyltransferase, ER membrane
PE (1-16:1, 2-18:1) diacylglycerol (1-18:1, 2-16:1) acyltransferase, ER membrane
PE (1-18:0, 2-18:1) diacylglycerol (1-18:1, 2-16:1) acyltransferase, ER membrane
PE (1-18:1, 2-18:1) diacylglycerol (1-18:1, 2-16:1) acyltransferase, ER membrane
PE (1-16:0, 2-16:1) diacylglycerol (1-16:0, 2-18:1) acyltransferase, ER membrane
PE (1-16:1, 2-16:1) diacylglycerol (1-16:0, 2-18:1) acyltransferase, ER membrane
PE (1-18:0, 2-16:1) diacylglycerol (1-16:0, 2-18:1) acyltransferase, ER membrane
PE (1-18:1, 2-16:1) diacylglycerol (1-16:0, 2-18:1) acyltransferase, ER membrane
PE (1-16:0, 2-18:1) diacylglycerol (1-16:0, 2-18:1) acyltransferase, ER membrane
PE (1-16:1, 2-18:1) diacylglycerol (1-16:0, 2-18:1) acyltransferase, ER membrane
PE (1-18:0, 2-18:1) diacylglycerol (1-16:0, 2-18:1) acyltransferase, ER membrane
PE (1-18:1, 2-18:1) diacylglycerol (1-16:0, 2-18:1) acyltransferase, ER membrane
PE (1-16:0, 2-16:1) diacylglycerol (1-16:1, 2-18:1) acyltransferase, ER membrane
PE (1-16:1, 2-16:1) diacylglycerol (1-16:1, 2-18:1) acyltransferase, ER membrane
PE (1-18:0, 2-16:1) diacylglycerol (1-16:1, 2-18:1) acyltransferase, ER membrane
PE (1-18:1, 2-16:1) diacylglycerol (1-16:1, 2-18:1) acyltransferase, ER membrane
PE (1-16:0, 2-18:1) diacylglycerol (1-16:1, 2-18:1) acyltransferase, ER membrane
PE (1-16:1, 2-18:1) diacylglycerol (1-16:1, 2-18:1) acyltransferase, ER membrane
PE (1-18:0, 2-18:1) diacylglycerol (1-16:1, 2-18:1) acyltransferase, ER membrane
PE (1-18:1, 2-18:1) diacylglycerol (1-16:1, 2-18:1) acyltransferase, ER membrane
PE (1-16:0, 2-16:1) diacylglycerol (1-18:0, 2-18:1) acyltransferase, ER membrane
PE (1-16:1, 2-16:1) diacylglycerol (1-18:0, 2-18:1) acyltransferase, ER membrane
PE (1-18:0, 2-16:1) diacylglycerol (1-18:0, 2-18:1) acyltransferase, ER membrane
PE (1-18:1, 2-16:1) diacylglycerol (1-18:0, 2-18:1) acyltransferase, ER membrane
PE (1-16:0, 2-18:1) diacylglycerol (1-18:0, 2-18:1) acyltransferase, ER membrane
PE (1-16:1, 2-18:1) diacylglycerol (1-18:0, 2-18:1) acyltransferase, ER membrane
PE (1-18:0, 2-18:1) diacylglycerol (1-18:0, 2-18:1) acyltransferase, ER membrane
PE (1-18:1, 2-18:1) diacylglycerol (1-18:0, 2-18:1) acyltransferase, ER membrane
PE (1-16:0, 2-16:1) diacylglycerol (1-18:1, 2-18:1) acyltransferase, ER membrane
PE (1-16:1, 2-16:1) diacylglycerol (1-18:1, 2-18:1) acyltransferase, ER membrane
PE (1-18:0, 2-16:1) diacylglycerol (1-18:1, 2-18:1) acyltransferase, ER membrane
PE (1-18:1, 2-16:1) diacylglycerol (1-18:1, 2-18:1) acyltransferase, ER membrane
PE (1-16:0, 2-18:1) diacylglycerol (1-18:1, 2-18:1) acyltransferase, ER membrane
PE (1-16:1, 2-18:1) diacylglycerol (1-18:1, 2-18:1) acyltransferase, ER membrane
PE (1-18:0, 2-18:1) diacylglycerol (1-18:1, 2-18:1) acyltransferase, ER membrane
PE (1-18:1, 2-18:1) diacylglycerol (1-18:1, 2-18:1) acyltransferase, ER membrane
PC (1-16:0, 2-16:1) diacylglycerol (1-16:0, 2-16:1) acyltransferase, ER membrane
PC (1-16:1, 2-16:1) diacylglycerol (1-16:0, 2-16:1) acyltransferase, ER membrane
PC (1-18:0, 2-16:1) diacylglycerol (1-16:0, 2-16:1) acyltransferase, ER membrane
PC (1-18:1, 2-16:1) diacylglycerol (1-16:0, 2-16:1) acyltransferase, ER membrane
PC (1-16:0, 2-18:1) diacylglycerol (1-16:0, 2-16:1) acyltransferase, ER membrane
PC (1-16:1, 2-18:1) diacylglycerol (1-16:0, 2-16:1) acyltransferase, ER membrane
PC (1-18:0, 2-18:1) diacylglycerol (1-16:0, 2-16:1) acyltransferase, ER membrane
PC (1-18:1, 2-18:1) diacylglycerol (1-16:0, 2-16:1) acyltransferase, ER membrane
PC (1-16:0, 2-16:1) diacylglycerol (1-16:1, 2-16:1) acyltransferase, ER membrane
PC (1-16:1, 2-16:1) diacylglycerol (1-16:1, 2-16:1) acyltransferase, ER membrane
PC (1-18:0, 2-16:1) diacylglycerol (1-16:1, 2-16:1) acyltransferase, ER membrane
PC (1-18:1, 2-16:1) diacylglycerol (1-16:1, 2-16:1) acyltransferase, ER membrane
PC (1-16:0, 2-18:1) diacylglycerol (1-16:1, 2-16:1) acyltransferase, ER membrane
PC (1-16:1, 2-18:1) diacylglycerol (1-16:1, 2-16:1) acyltransferase, ER membrane
PC (1-18:0, 2-18:1) diacylglycerol (1-16:1, 2-16:1) acyltransferase, ER membrane
PC (1-18:1, 2-18:1) diacylglycerol (1-16:1, 2-16:1) acyltransferase, ER membrane
PC (1-16:0, 2-16:1) diacylglycerol (1-18:0, 2-16:1) acyltransferase, ER membrane
PC (1-16:1, 2-16:1) diacylglycerol (1-18:0, 2-16:1) acyltransferase, ER membrane
PC (1-18:0, 2-16:1) diacylglycerol (1-18:0, 2-16:1) acyltransferase, ER membrane
PC (1-18:1, 2-16:1) diacylglycerol (1-18:0, 2-16:1) acyltransferase, ER membrane
PC (1-16:0, 2-18:1) diacylglycerol (1-18:0, 2-16:1) acyltransferase, ER membrane
PC (1-16:1, 2-18:1) diacylglycerol (1-18:0, 2-16:1) acyltransferase, ER membrane
PC (1-18:0, 2-18:1) diacylglycerol (1-18:0, 2-16:1) acyltransferase, ER membrane
PC (1-18:1, 2-18:1) diacylglycerol (1-18:0, 2-16:1) acyltransferase, ER membrane
PC (1-16:0, 2-16:1) diacylglycerol (1-18:1, 2-16:1) acyltransferase, ER membrane
PC (1-16:1, 2-16:1) diacylglycerol (1-18:1, 2-16:1) acyltransferase, ER membrane
PC (1-18:0, 2-16:1) diacylglycerol (1-18:1, 2-16:1) acyltransferase, ER membrane
PC (1-18:1, 2-16:1) diacylglycerol (1-18:1, 2-16:1) acyltransferase, ER membrane
PC (1-16:0, 2-18:1) diacylglycerol (1-18:1, 2-16:1) acyltransferase, ER membrane
PC (1-16:1, 2-18:1) diacylglycerol (1-18:1, 2-16:1) acyltransferase, ER membrane
PC (1-18:0, 2-18:1) diacylglycerol (1-18:1, 2-16:1) acyltransferase, ER membrane
PC (1-18:1, 2-18:1) diacylglycerol (1-18:1, 2-16:1) acyltransferase, ER membrane
PC (1-16:0, 2-16:1) diacylglycerol (1-16:0, 2-18:1) acyltransferase, ER membrane
PC (1-16:1, 2-16:1) diacylglycerol (1-16:0, 2-18:1) acyltransferase, ER membrane
PC (1-18:0, 2-16:1) diacylglycerol (1-16:0, 2-18:1) acyltransferase, ER membrane
PC (1-18:1, 2-16:1) diacylglycerol (1-16:0, 2-18:1) acyltransferase, ER membrane
PC (1-16:0, 2-18:1) diacylglycerol (1-16:0, 2-18:1) acyltransferase, ER membrane
PC (1-16:1, 2-18:1) diacylglycerol (1-16:0, 2-18:1) acyltransferase, ER membrane
PC (1-18:0, 2-18:1) diacylglycerol (1-16:0, 2-18:1) acyltransferase, ER membrane
PC (1-18:1, 2-18:1) diacylglycerol (1-16:0, 2-18:1) acyltransferase, ER membrane
PC (1-16:0, 2-16:1) diacylglycerol (1-16:1, 2-18:1) acyltransferase, ER membrane
PC (1-16:1, 2-16:1) diacylglycerol (1-16:1, 2-18:1) acyltransferase, ER membrane
PC (1-18:0, 2-16:1) diacylglycerol (1-16:1, 2-18:1) acyltransferase, ER membrane
PC (1-18:1, 2-16:1) diacylglycerol (1-16:1, 2-18:1) acyltransferase, ER membrane
PC (1-16:0, 2-18:1) diacylglycerol (1-16:1, 2-18:1) acyltransferase, ER membrane
PC (1-16:1, 2-18:1) diacylglycerol (1-16:1, 2-18:1) acyltransferase, ER membrane
PC (1-18:0, 2-18:1) diacylglycerol (1-16:1, 2-18:1) acyltransferase, ER membrane
PC (1-18:1, 2-18:1) diacylglycerol (1-16:1, 2-18:1) acyltransferase, ER membrane
PC (1-16:0, 2-16:1) diacylglycerol (1-18:0, 2-18:1) acyltransferase, ER membrane
PC (1-16:1, 2-16:1) diacylglycerol (1-18:0, 2-18:1) acyltransferase, ER membrane
PC (1-18:0, 2-16:1) diacylglycerol (1-18:0, 2-18:1) acyltransferase, ER membrane
PC (1-18:1, 2-16:1) diacylglycerol (1-18:0, 2-18:1) acyltransferase, ER membrane
PC (1-16:0, 2-18:1) diacylglycerol (1-18:0, 2-18:1) acyltransferase, ER membrane
PC (1-16:1, 2-18:1) diacylglycerol (1-18:0, 2-18:1) acyltransferase, ER membrane
PC (1-18:0, 2-18:1) diacylglycerol (1-18:0, 2-18:1) acyltransferase, ER membrane
PC (1-18:1, 2-18:1) diacylglycerol (1-18:0, 2-18:1) acyltransferase, ER membrane
PC (1-16:0, 2-16:1) diacylglycerol (1-18:1, 2-18:1) acyltransferase, ER membrane
PC (1-16:1, 2-16:1) diacylglycerol (1-18:1, 2-18:1) acyltransferase, ER membrane
PC (1-18:0, 2-16:1) diacylglycerol (1-18:1, 2-18:1) acyltransferase, ER membrane
PC (1-18:1, 2-16:1) diacylglycerol (1-18:1, 2-18:1) acyltransferase, ER membrane
PC (1-16:0, 2-18:1) diacylglycerol (1-18:1, 2-18:1) acyltransferase, ER membrane
PC (1-16:1, 2-18:1) diacylglycerol (1-18:1, 2-18:1) acyltransferase, ER membrane
PC (1-18:0, 2-18:1) diacylglycerol (1-18:1, 2-18:1) acyltransferase, ER membrane
PC (1-18:1, 2-18:1) diacylglycerol (1-18:1, 2-18:1) acyltransferase, ER membrane
PC phospholipase B (1-16:0, 2-16:1), ER membrane
PC phospholipase B (1-16:1, 2-16:1), ER membrane
PC phospholipase B (1-18:0, 2-16:1), ER membrane
PC phospholipase B (1-18:1, 2-16:1), ER membrane
PC phospholipase B (1-16:0, 2-18:1), ER membrane
PC phospholipase B (1-16:1, 2-18:1), ER membrane
PC phospholipase B (1-18:0, 2-18:1), ER membrane
PC phospholipase B (1-18:1, 2-18:1), ER membrane
LPC phospholipase B (16:0), ER membrane
LPC phospholipase B (16:1), ER membrane
LPC phospholipase B (18:0), ER membrane
LPC phospholipase B (18:1), ER membrane
PC phospholipase B (1-16:0, 2-16:1), cell envelope
PC phospholipase B (1-16:1, 2-16:1), cell envelope
PC phospholipase B (1-18:0, 2-16:1), cell envelope
PC phospholipase B (1-18:1, 2-16:1), cell envelope
PC phospholipase B (1-16:0, 2-18:1), cell envelope
PC phospholipase B (1-16:1, 2-18:1), cell envelope
PC phospholipase B (1-18:0, 2-18:1), cell envelope
PC phospholipase B (1-18:1, 2-18:1), cell envelope
LPC phospholipase B (16:0), cell envelope
LPC phospholipase B (16:1), cell envelope
LPC phospholipase B (18:0), cell envelope
LPC phospholipase B (18:1), cell envelope
PI phospholipase B (1-16:0, 2-16:1), cell envelope
PI phospholipase B (1-16:1, 2-16:1), cell envelope
PI phospholipase B (1-18:0, 2-16:1), cell envelope
PI phospholipase B (1-18:1, 2-16:1), cell envelope
PI phospholipase B (1-16:0, 2-18:1), cell envelope
PI phospholipase B (1-16:1, 2-18:1), cell envelope
PI phospholipase B (1-18:0, 2-18:1), cell envelope
PI phospholipase B (1-18:1, 2-18:1), cell envelope
LPI phospholipase B (16:0), cell envelope
LPI phospholipase B (16:1), cell envelope
LPI phospholipase B (18:0), cell envelope
LPI phospholipase B (18:1), cell envelope
PG phospholipase C (1-16:0, 2-16:1), mitochondrial membrane
PG phospholipase C (1-16:1, 2-16:1), mitochondrial membrane
PG phospholipase C (1-18:0, 2-16:1), mitochondrial membrane
PG phospholipase C (1-18:1, 2-16:1), mitochondrial membrane
PG phospholipase C (1-16:0, 2-18:1), mitochondrial membrane
PG phospholipase C (1-16:1, 2-18:1), mitochondrial membrane
PC phospholipase D (1-16:0, 2-16:1), cell envelope
PC phospholipase D (1-16:1, 2-16:1), cell envelope
PC phospholipase D (1-18:0, 2-16:1), cell envelope
PC phospholipase D (1-18:1, 2-16:1), cell envelope
PC phospholipase D (1-16:0, 2-18:1), cell envelope
PC phospholipase D (1-16:1, 2-18:1), cell envelope
PC phospholipase D (1-18:0, 2-18:1), cell envelope
PC phospholipase D (1-18:1, 2-18:1), cell envelope
PI 3-P phosphatase (1-16:0, 2-16:1), cell envelope
PI 3-P phosphatase (1-16:1, 2-16:1), cell envelope
PI 3-P phosphatase (1-18:0, 2-16:1), cell envelope
PI 3-P phosphatase (1-18:1, 2-16:1), cell envelope
PI 3-P phosphatase (1-16:0, 2-18:1), cell envelope
PI 3-P phosphatase (1-16:1, 2-18:1), cell envelope
PI 3-P phosphatase (1-18:0, 2-18:1), cell envelope
PI 3-P phosphatase (1-18:1, 2-18:1), cell envelope
PI 3-P phosphatase (1-16:0, 2-16:1), cytoplasm
PI 3-P phosphatase (1-16:1, 2-16:1), cytoplasm
PI 3-P phosphatase (1-18:0, 2-16:1), cytoplasm
PI 3-P phosphatase (1-18:1, 2-16:1), cytoplasm
PI 3-P phosphatase (1-16:0, 2-18:1), cytoplasm
PI 3-P phosphatase (1-16:1, 2-18:1), cytoplasm
PI 3-P phosphatase (1-18:0, 2-18:1), cytoplasm
PI 3-P phosphatase (1-18:1, 2-18:1), cytoplasm
PI 3-P phosphatase (1-16:0, 2-16:1), ER membrane
PI 3-P phosphatase (1-16:1, 2-16:1), ER membrane
PI 3-P phosphatase (1-18:0, 2-16:1), ER membrane
PI 3-P phosphatase (1-18:1, 2-16:1), ER membrane
PI 3-P phosphatase (1-16:0, 2-18:1), ER membrane
PI 3-P phosphatase (1-16:1, 2-18:1), ER membrane
PI 3-P phosphatase (1-18:0, 2-18:1), ER membrane
PI 3-P phosphatase (1-18:1, 2-18:1), ER membrane
PI 3-P phosphatase (1-16:0, 2-16:1), Golgi membrane
PI 3-P phosphatase (1-16:1, 2-16:1), Golgi membrane
PI 3-P phosphatase (1-18:0, 2-16:1), Golgi membrane
PI 3-P phosphatase (1-18:1, 2-16:1), Golgi membrane
PI 3-P phosphatase (1-16:0, 2-18:1), Golgi membrane
PI 3-P phosphatase (1-16:1, 2-18:1), Golgi membrane
PI 3-P phosphatase (1-18:0, 2-18:1), Golgi membrane
PI 3-P phosphatase (1-18:1, 2-18:1), Golgi membrane
PI 4-P phosphatase (1-16:0, 2-16:1), cell envelope
PI 4-P phosphatase (1-16:1, 2-16:1), cell envelope
PI 4-P phosphatase (1-18:0, 2-16:1), cell envelope
PI 4-P phosphatase (1-18:1, 2-16:1), cell envelope
PI 4-P phosphatase (1-16:0, 2-18:1), cell envelope
PI 4-P phosphatase (1-16:1, 2-18:1), cell envelope
PI 4-P phosphatase (1-18:0, 2-18:1), cell envelope
PI 4-P phosphatase (1-18:1, 2-18:1), cell envelope
PI 4-P phosphatase (1-16:0, 2-16:1), cytoplasm
PI 4-P phosphatase (1-16:1, 2-16:1), cytoplasm
PI 4-P phosphatase (1-18:0, 2-16:1), cytoplasm
PI 4-P phosphatase (1-18:1, 2-16:1), cytoplasm
PI 4-P phosphatase (1-16:0, 2-18:1), cytoplasm
PI 4-P phosphatase (1-16:1, 2-18:1), cytoplasm
PI 4-P phosphatase (1-18:0, 2-18:1), cytoplasm
PI 4-P phosphatase (1-18:1, 2-18:1), cytoplasm
PI 4-P phosphatase (1-16:0, 2-16:1), ER membrane
PI 4-P phosphatase (1-16:1, 2-16:1), ER membrane
PI 4-P phosphatase (1-18:0, 2-16:1), ER membrane
PI 4-P phosphatase (1-18:1, 2-16:1), ER membrane
PI 4-P phosphatase (1-16:0, 2-18:1), ER membrane
PI 4-P phosphatase (1-16:1, 2-18:1), ER membrane
PI 4-P phosphatase (1-18:0, 2-18:1), ER membrane
PI 4-P phosphatase (1-18:1, 2-18:1), ER membrane
PI 4-P phosphatase (1-16:0, 2-16:1), Golgi membrane
PI 4-P phosphatase (1-16:1, 2-16:1), Golgi membrane
PI 4-P phosphatase (1-18:0, 2-16:1), Golgi membrane
PI 4-P phosphatase (1-18:1, 2-16:1), Golgi membrane
PI 4-P phosphatase (1-16:0, 2-18:1), Golgi membrane
PI 4-P phosphatase (1-16:1, 2-18:1), Golgi membrane
PI 4-P phosphatase (1-18:0, 2-18:1), Golgi membrane
PI 4-P phosphatase (1-18:1, 2-18:1), Golgi membrane
PI 3,5-P2 phosphatase (1-16:0, 2-16:1), cell envelope
PI 3,5-P2 phosphatase (1-16:1, 2-16:1), cell envelope
PI 3,5-P2 phosphatase (1-18:0, 2-16:1), cell envelope
PI 3,5-P2 phosphatase (1-18:1, 2-16:1), cell envelope
PI 3,5-P2 phosphatase (1-16:0, 2-18:1), cell envelope
PI 3,5-P2 phosphatase (1-16:1, 2-18:1), cell envelope
PI 3,5-P2 phosphatase (1-18:0, 2-18:1), cell envelope
PI 3,5-P2 phosphatase (1-18:1, 2-18:1), cell envelope
PI 3,5-P2 phosphatase (1-16:0, 2-16:1), cytoplasm
PI 3,5-P2 phosphatase (1-16:1, 2-16:1), cytoplasm
PI 3,5-P2 phosphatase (1-18:0, 2-16:1), cytoplasm
PI 3,5-P2 phosphatase (1-18:1, 2-16:1), cytoplasm
PI 3,5-P2 phosphatase (1-16:0, 2-18:1), cytoplasm
PI 3,5-P2 phosphatase (1-16:1, 2-18:1), cytoplasm
PI 3,5-P2 phosphatase (1-18:0, 2-18:1), cytoplasm
PI 3,5-P2 phosphatase (1-18:1, 2-18:1), cytoplasm
PI 4,5-P2 phosphatase (1-16:0, 2-16:1), cell envelope
PI 4,5-P2 phosphatase (1-16:1, 2-16:1), cell envelope
PI 4,5-P2 phosphatase (1-18:0, 2-16:1), cell envelope
PI 4,5-P2 phosphatase (1-18:1, 2-16:1), cell envelope
PI 4,5-P2 phosphatase (1-16:0, 2-18:1), cell envelope
PI 4,5-P2 phosphatase (1-16:1, 2-18:1), cell envelope
PI 4,5-P2 phosphatase (1-18:0, 2-18:1), cell envelope
PI 4,5-P2 phosphatase (1-18:1, 2-18:1), cell envelope
PI 4,5-P2 phosphatase (1-16:0, 2-16:1), cytoplasm
PI 4,5-P2 phosphatase (1-16:1, 2-16:1), cytoplasm
PI 4,5-P2 phosphatase (1-18:0, 2-16:1), cytoplasm
PI 4,5-P2 phosphatase (1-18:1, 2-16:1), cytoplasm
PI 4,5-P2 phosphatase (1-16:0, 2-18:1), cytoplasm
PI 4,5-P2 phosphatase (1-16:1, 2-18:1), cytoplasm
PI 4,5-P2 phosphatase (1-18:0, 2-18:1), cytoplasm
PI 4,5-P2 phosphatase (1-18:1, 2-18:1), cytoplasm
PI 4,5-P2 phosphatase (1-16:0, 2-16:1), ER membrane
PI 4,5-P2 phosphatase (1-16:1, 2-16:1), ER membrane
PI 4,5-P2 phosphatase (1-18:0, 2-16:1), ER membrane
PI 4,5-P2 phosphatase (1-18:1, 2-16:1), ER membrane
PI 4,5-P2 phosphatase (1-16:0, 2-18:1), ER membrane
PI 4,5-P2 phosphatase (1-16:1, 2-18:1), ER membrane
PI 4,5-P2 phosphatase (1-18:0, 2-18:1), ER membrane
PI 4,5-P2 phosphatase (1-18:1, 2-18:1), ER membrane
PI 3,5-P2 phosphatase (1-16:0, 2-16:1), vacuolar membrane
PI 3,5-P2 phosphatase (1-16:1, 2-16:1), vacuolar membrane
PI 3,5-P2 phosphatase (1-18:0, 2-16:1), vacuolar membrane
PI 3,5-P2 phosphatase (1-18:1, 2-16:1), vacuolar membrane
PI 3,5-P2 phosphatase (1-16:0, 2-18:1), vacuolar membrane
PI 3,5-P2 phosphatase (1-16:1, 2-18:1), vacuolar membrane
PI 3,5-P2 phosphatase (1-18:0, 2-18:1), vacuolar membrane
PI 3,5-P2 phosphatase (1-18:1, 2-18:1), vacuolar membrane
DGPP phosphatase (1-16:0, 2-16:1), vacuolar membrane
DGPP phosphatase (1-16:1, 2-16:1), vacuolar membrane
DGPP phosphatase (1-18:0, 2-16:1), vacuolar membrane
DGPP phosphatase (1-18:1, 2-16:1), vacuolar membrane
DGPP phosphatase (1-16:0, 2-18:1), vacuolar membrane
DGPP phosphatase (1-16:1, 2-18:1), vacuolar membrane
DGPP phosphatase (1-18:0, 2-18:1), vacuolar membrane
DGPP phosphatase (1-18:1, 2-18:1), vacuolar membrane
DGPP phosphatase (1-16:0, 2-16:1), Golgi membrane
DGPP phosphatase (1-16:1, 2-16:1), Golgi membrane
DGPP phosphatase (1-18:0, 2-16:1), Golgi membrane
DGPP phosphatase (1-18:1, 2-16:1), Golgi membrane
DGPP phosphatase (1-16:0, 2-18:1), Golgi membrane
DGPP phosphatase (1-16:1, 2-18:1), Golgi membrane
DGPP phosphatase (1-18:0, 2-18:1), Golgi membrane
DGPP phosphatase (1-18:1, 2-18:1), Golgi membrane
ergosteryl ester hydrolase (16:1), lipid particle
ergosteryl ester hydrolase (18:1), lipid particle
episteryl ester hydrolase (16:1), lipid particle
episteryl ester hydrolase (18:1), lipid particle
fecosteryl ester hydrolase (16:1), lipid particle
fecosteryl ester hydrolase (18:1), lipid particle
lanosteryl ester hydrolase (16:1), lipid particle
lanosteryl ester hydrolase (18:1), lipid particle
zymosteryl ester hydrolase (16:1), lipid particle
zymosteryl ester hydrolase (18:1), lipid particle
zymosteryl ester hydrolase (16:1), cell envelope
zymosteryl ester hydrolase (18:1), cell envelope
TAG lipase (1-16:0, 2-16:1, 3-16:0), lipid particle
TAG lipase (1-16:0, 2-16:1, 3-16:1), lipid particle
TAG lipase (1-16:0, 2-16:1, 3-18:0), lipid particle
TAG lipase (1-16:0, 2-16:1, 3-18:1), lipid particle
TAG lipase (1-16:1, 2-16:1, 3-16:0), lipid particle
TAG lipase (1-16:1, 2-16:1, 3-16:1), lipid particle
TAG lipase (1-16:1, 2-16:1, 3-18:0), lipid particle
TAG lipase (1-16:1, 2-16:1, 3-18:1), lipid particle
TAG lipase (1-18:0, 2-16:1, 3-16:0), lipid particle
TAG lipase (1-18:0, 2-16:1, 3-16:1), lipid particle
TAG lipase (1-18:0, 2-16:1, 3-18:0), lipid particle
TAG lipase (1-18:0, 2-16:1, 3-18:1), lipid particle
TAG lipase (1-18:1, 2-16:1, 3-16:0), lipid particle
TAG lipase (1-18:1, 2-16:1, 3-16:1), lipid particle
TAG lipase (1-18:1, 2-16:1, 3-18:0), lipid particle
TAG lipase (1-18:1, 2-16:1, 3-18:1), lipid particle
TAG lipase (1-16:0, 2-18:1, 3-16:0), lipid particle
TAG lipase (1-16:0, 2-18:1, 3-16:1), lipid particle
TAG lipase (1-16:0, 2-18:1, 3-18:0), lipid particle
TAG lipase (1-16:0, 2-18:1, 3-18:1), lipid particle
TAG lipase (1-16:1, 2-18:1, 3-16:0), lipid particle
TAG lipase (1-16:1, 2-18:1, 3-16:1), lipid particle
TAG lipase (1-16:1, 2-18:1, 3-18:0), lipid particle
TAG lipase (1-16:1, 2-18:1, 3-18:1), lipid particle
TAG lipase (1-18:0, 2-18:1, 3-16:0), lipid particle
TAG lipase (1-18:0, 2-18:1, 3-16:1), lipid particle
TAG lipase (1-18:0, 2-18:1, 3-18:0), lipid particle
TAG lipase (1-18:0, 2-18:1, 3-18:1), lipid particle
TAG lipase (1-18:1, 2-18:1, 3-16:0), lipid particle
TAG lipase (1-18:1, 2-18:1, 3-16:1), lipid particle
TAG lipase (1-18:1, 2-18:1, 3-18:0), lipid particle
TAG lipase (1-18:1, 2-18:1, 3-18:1), lipid particle
DAG lipase (1-16:0, 2-16:1), lipid particle
DAG lipase (1-16:1, 2-16:1), lipid particle
DAG lipase (1-18:0, 2-16:1), lipid particle
DAG lipase (1-18:1, 2-16:1), lipid particle
DAG lipase (1-16:0, 2-18:1), lipid particle
DAG lipase (1-16:1, 2-18:1), lipid particle
DAG lipase (1-18:0, 2-18:1), lipid particle
DAG lipase (1-18:1, 2-18:1), lipid particle
MAG lipase (1-16:0), lipid particle
MAG lipase (1-16:1), lipid particle
MAG lipase (1-18:0), lipid particle
MAG lipase (1-18:1), lipid particle
lysoPE (1-16:0) oleoyl-CoA acyltransferase, lipid particle
lysoPE (1-16:1) oleoyl-CoA acyltransferase, lipid particle
lysoPE (1-18:0) oleoyl-CoA acyltransferase, lipid particle
lysoPE (1-18:1) oleoyl-CoA acyltransferase, lipid particle
PC phospholipase A2 (1-16:0, 2-16:1), lipid particle
PC phospholipase A2 (1-16:1, 2-16:1), lipid particle
PC phospholipase A2 (1-18:0, 2-16:1), lipid particle
PC phospholipase A2 (1-18:1, 2-16:1), lipid particle
PC phospholipase A2 (1-16:0, 2-18:1), lipid particle
PC phospholipase A2 (1-16:1, 2-18:1), lipid particle
PC phospholipase A2 (1-18:0, 2-18:1), lipid particle
PC phospholipase A2 (1-18:1, 2-18:1), lipid particle
PE phospholipase A2 (1-16:0, 2-16:1), lipid particle
PE phospholipase A2 (1-16:1, 2-16:1), lipid particle
PE phospholipase A2 (1-18:0, 2-16:1), lipid particle
PE phospholipase A2 (1-18:1, 2-16:1), lipid particle
PE phospholipase A2 (1-16:0, 2-18:1), lipid particle
PE phospholipase A2 (1-16:1, 2-18:1), lipid particle
PE phospholipase A2 (1-18:0, 2-18:1), lipid particle
PE phospholipase A2 (1-18:1, 2-18:1), lipid particle
inositolphosphotransferase (PI (1-16:0, 2-16:1) MIPC-A (C24))
inositolphosphotransferase (PI (1-16:1, 2-16:1) MIPC-A (C24))
inositolphosphotransferase (PI (1-18:0, 2-16:1) MIPC-A (C24))
inositolphosphotransferase (PI (1-18:1, 2-16:1) MIPC-A (C24))
inositolphosphotransferase (PI (1-16:0, 2-18:1) MIPC-A (C24))
inositolphosphotransferase (PI (1-16:1, 2-18:1) MIPC-A (C24))
inositolphosphotransferase (PI (1-18:0, 2-18:1) MIPC-A (C24))
inositolphosphotransferase (PI (1-18:1, 2-18:1) MIPC-A (C24))
inositolphosphotransferase (PI (1-16:0, 2-16:1) MIPC-A (C26))
inositolphosphotransferase (PI (1-16:1, 2-16:1) MIPC-A (C26))
inositolphosphotransferase (PI (1-18:0, 2-16:1) MIPC-A (C26))
inositolphosphotransferase (PI (1-18:1, 2-16:1) MIPC-A (C26))
inositolphosphotransferase (PI (1-16:0, 2-18:1) MIPC-A (C26))
inositolphosphotransferase (PI (1-16:1, 2-18:1) MIPC-A (C26))
inositolphosphotransferase (PI (1-18:0, 2-18:1) MIPC-A (C26))
inositolphosphotransferase (PI (1-18:1, 2-18:1) MIPC-A (C26))
inositolphosphotransferase (PI (1-16:0, 2-16:1) MIPC-B' (C24))
inositolphosphotransferase (PI (1-16:1, 2-16:1) MIPC-B' (C24))
inositolphosphotransferase (PI (1-18:0, 2-16:1) MIPC-B' (C24))
inositolphosphotransferase (PI (1-18:1, 2-16:1) MIPC-B' (C24))
inositolphosphotransferase (PI (1-16:0, 2-18:1) MIPC-B' (C24))
inositolphosphotransferase (PI (1-16:1, 2-18:1) MIPC-B' (C24))
inositolphosphotransferase (PI (1-18:0, 2-18:1) MIPC-B' (C24))
inositolphosphotransferase (PI (1-18:1, 2-18:1) MIPC-B' (C24))
inositolphosphotransferase (PI (1-16:0, 2-16:1) MIPC-B' (C26))
inositolphosphotransferase (PI (1-16:1, 2-16:1) MIPC-B' (C26))
inositolphosphotransferase (PI (1-18:0, 2-16:1) MIPC-B' (C26))
inositolphosphotransferase (PI (1-18:1, 2-16:1) MIPC-B' (C26))
inositolphosphotransferase (PI (1-16:0, 2-18:1) MIPC-B' (C26))
inositolphosphotransferase (PI (1-16:1, 2-18:1) MIPC-B' (C26))
inositolphosphotransferase (PI (1-18:0, 2-18:1) MIPC-B' (C26))
inositolphosphotransferase (PI (1-18:1, 2-18:1) MIPC-B' (C26))
inositolphosphotransferase (PI (1-16:0, 2-16:1) MIPC-B (C24))
inositolphosphotransferase (PI (1-16:1, 2-16:1) MIPC-B (C24))
inositolphosphotransferase (PI (1-18:0, 2-16:1) MIPC-B (C24))
inositolphosphotransferase (PI (1-18:1, 2-16:1) MIPC-B (C24))
inositolphosphotransferase (PI (1-16:0, 2-18:1) MIPC-B (C24))
inositolphosphotransferase (PI (1-16:1, 2-18:1) MIPC-B (C24))
inositolphosphotransferase (PI (1-18:0, 2-18:1) MIPC-B (C24))
inositolphosphotransferase (PI (1-18:1, 2-18:1) MIPC-B (C24))
inositolphosphotransferase (PI (1-16:0, 2-16:1) MIPC-B (C26))
inositolphosphotransferase (PI (1-16:1, 2-16:1) MIPC-B (C26))
inositolphosphotransferase (PI (1-18:0, 2-16:1) MIPC-B (C26))
inositolphosphotransferase (PI (1-18:1, 2-16:1) MIPC-B (C26))
inositolphosphotransferase (PI (1-16:0, 2-18:1) MIPC-B (C26))
inositolphosphotransferase (PI (1-16:1, 2-18:1) MIPC-B (C26))
inositolphosphotransferase (PI (1-18:0, 2-18:1) MIPC-B (C26))
inositolphosphotransferase (PI (1-18:1, 2-18:1) MIPC-B (C26))
inositolphosphotransferase (PI (1-16:0, 2-16:1) MIPC-C (C24))
inositolphosphotransferase (PI (1-16:1, 2-16:1) MIPC-C (C24))
inositolphosphotransferase (PI (1-18:0, 2-16:1) MIPC-C (C24))
inositolphosphotransferase (PI (1-18:1, 2-16:1) MIPC-C (C24))
inositolphosphotransferase (PI (1-16:0, 2-18:1) MIPC-C (C24))
inositolphosphotransferase (PI (1-16:1, 2-18:1) MIPC-C (C24))
inositolphosphotransferase (PI (1-18:0, 2-18:1) MIPC-C (C24))
inositolphosphotransferase (PI (1-18:1, 2-18:1) MIPC-C (C24))
inositolphosphotransferase (PI (1-16:0, 2-16:1) MIPC-C (C26))
inositolphosphotransferase (PI (1-16:1, 2-16:1) MIPC-C (C26))
inositolphosphotransferase (PI (1-18:0, 2-16:1) MIPC-C (C26))
inositolphosphotransferase (PI (1-18:1, 2-16:1) MIPC-C (C26))
inositolphosphotransferase (PI (1-16:0, 2-18:1) MIPC-C (C26))
inositolphosphotransferase (PI (1-16:1, 2-18:1) MIPC-C (C26))
inositolphosphotransferase (PI (1-18:0, 2-18:1) MIPC-C (C26))
inositolphosphotransferase (PI (1-18:1, 2-18:1) MIPC-C (C26))
inositolphosphotransferase (PI (1-16:0, 2-16:1) MIPC-D (C24))
inositolphosphotransferase (PI (1-16:1, 2-16:1) MIPC-D (C24))
inositolphosphotransferase (PI (1-18:0, 2-16:1) MIPC-D (C24))
inositolphosphotransferase (PI (1-18:1, 2-16:1) MIPC-D (C24))
inositolphosphotransferase (PI (1-16:0, 2-18:1) MIPC-D (C24))
inositolphosphotransferase (PI (1-16:1, 2-18:1) MIPC-D (C24))
inositolphosphotransferase (PI (1-18:0, 2-18:1) MIPC-D (C24))
inositolphosphotransferase (PI (1-18:1, 2-18:1) MIPC-D (C24))
inositolphosphotransferase (PI (1-16:0, 2-16:1) MIPC-D (C26))
inositolphosphotransferase (PI (1-16:1, 2-16:1) MIPC-D (C26))
inositolphosphotransferase (PI (1-18:0, 2-16:1) MIPC-D (C26))
inositolphosphotransferase (PI (1-18:1, 2-16:1) MIPC-D (C26))
inositolphosphotransferase (PI (1-16:0, 2-18:1) MIPC-D (C26))
inositolphosphotransferase (PI (1-16:1, 2-18:1) MIPC-D (C26))
inositolphosphotransferase (PI (1-18:0, 2-18:1) MIPC-D (C26))
inositolphosphotransferase (PI (1-18:1, 2-18:1) MIPC-D (C26))
IPC synthase (PI (1-16:0, 2-16:1) ceramide-1 (C24))
IPC synthase (PI (1-16:1, 2-16:1) ceramide-1 (C24))
IPC synthase (PI (1-18:0, 2-16:1) ceramide-1 (C24))
IPC synthase (PI (1-18:1, 2-16:1) ceramide-1 (C24))
IPC synthase (PI (1-16:0, 2-18:1) ceramide-1 (C24))
IPC synthase (PI (1-16:1, 2-18:1) ceramide-1 (C24))
IPC synthase (PI (1-18:0, 2-18:1) ceramide-1 (C24))
IPC synthase (PI (1-18:1, 2-18:1) ceramide-1 (C24))
IPC synthase (PI (1-16:0, 2-16:1) ceramide-1 (C26))
IPC synthase (PI (1-16:1, 2-16:1) ceramide-1 (C26))
IPC synthase (PI (1-18:0, 2-16:1) ceramide-1 (C26))
IPC synthase (PI (1-18:1, 2-16:1) ceramide-1 (C26))
IPC synthase (PI (1-16:0, 2-18:1) ceramide-1 (C26))
IPC synthase (PI (1-16:1, 2-18:1) ceramide-1 (C26))
IPC synthase (PI (1-18:0, 2-18:1) ceramide-1 (C26))
IPC synthase (PI (1-18:1, 2-18:1) ceramide-1 (C26))
IPC synthase (PI (1-16:0, 2-16:1) ceramide-2' (C24))
IPC synthase (PI (1-16:1, 2-16:1) ceramide-2' (C24))
IPC synthase (PI (1-18:0, 2-16:1) ceramide-2' (C24))
IPC synthase (PI (1-18:1, 2-16:1) ceramide-2' (C24))
IPC synthase (PI (1-16:0, 2-18:1) ceramide-2' (C24))
IPC synthase (PI (1-16:1, 2-18:1) ceramide-2' (C24))
IPC synthase (PI (1-18:0, 2-18:1) ceramide-2' (C24))
IPC synthase (PI (1-18:1, 2-18:1) ceramide-2' (C24))
IPC synthase (PI (1-16:0, 2-16:1) ceramide-2' (C26))
IPC synthase (PI (1-16:1, 2-16:1) ceramide-2' (C26))
IPC synthase (PI (1-18:0, 2-16:1) ceramide-2' (C26))
IPC synthase (PI (1-18:1, 2-16:1) ceramide-2' (C26))
IPC synthase (PI (1-16:0, 2-18:1) ceramide-2' (C26))
IPC synthase (PI (1-16:1, 2-18:1) ceramide-2' (C26))
IPC synthase (PI (1-18:0, 2-18:1) ceramide-2' (C26))
IPC synthase (PI (1-18:1, 2-18:1) ceramide-2' (C26))
IPC synthase (PI (1-16:0, 2-16:1) ceramide-2 (C24))
IPC synthase (PI (1-16:1, 2-16:1) ceramide-2 (C24))
IPC synthase (PI (1-18:0, 2-16:1) ceramide-2 (C24))
IPC synthase (PI (1-18:1, 2-16:1) ceramide-2 (C24))
IPC synthase (PI (1-16:0, 2-18:1) ceramide-2 (C24))
IPC synthase (PI (1-16:1, 2-18:1) ceramide-2 (C24))
IPC synthase (PI (1-18:0, 2-18:1) ceramide-2 (C24))
IPC synthase (PI (1-18:1, 2-18:1) ceramide-2 (C24))
IPC synthase (PI (1-16:0, 2-16:1) ceramide-2 (C26))
IPC synthase (PI (1-16:1, 2-16:1) ceramide-2 (C26))
IPC synthase (PI (1-18:0, 2-16:1) ceramide-2 (C26))
IPC synthase (PI (1-18:1, 2-16:1) ceramide-2 (C26))
IPC synthase (PI (1-16:0, 2-18:1) ceramide-2 (C26))
IPC synthase (PI (1-16:1, 2-18:1) ceramide-2 (C26))
IPC synthase (PI (1-18:0, 2-18:1) ceramide-2 (C26))
IPC synthase (PI (1-18:1, 2-18:1) ceramide-2 (C26))
IPC synthase (PI (1-16:0, 2-16:1) ceramide-3 (C24))
IPC synthase (PI (1-16:1, 2-16:1) ceramide-3 (C24))
IPC synthase (PI (1-18:0, 2-16:1) ceramide-3 (C24))
IPC synthase (PI (1-18:1, 2-16:1) ceramide-3 (C24))
IPC synthase (PI (1-16:0, 2-18:1) ceramide-3 (C24))
IPC synthase (PI (1-16:1, 2-18:1) ceramide-3 (C24))
IPC synthase (PI (1-18:0, 2-18:1) ceramide-3 (C24))
IPC synthase (PI (1-18:1, 2-18:1) ceramide-3 (C24))
IPC synthase (PI (1-16:0, 2-16:1) ceramide-3 (C26))
IPC synthase (PI (1-16:1, 2-16:1) ceramide-3 (C26))
IPC synthase (PI (1-18:0, 2-16:1) ceramide-3 (C26))
IPC synthase (PI (1-18:1, 2-16:1) ceramide-3 (C26))
IPC synthase (PI (1-16:0, 2-18:1) ceramide-3 (C26))
IPC synthase (PI (1-16:1, 2-18:1) ceramide-3 (C26))
IPC synthase (PI (1-18:0, 2-18:1) ceramide-3 (C26))
IPC synthase (PI (1-18:1, 2-18:1) ceramide-3 (C26))
IPC synthase (PI (1-16:0, 2-16:1) ceramide-4 (C24))
IPC synthase (PI (1-16:1, 2-16:1) ceramide-4 (C24))
IPC synthase (PI (1-18:0, 2-16:1) ceramide-4 (C24))
IPC synthase (PI (1-18:1, 2-16:1) ceramide-4 (C24))
IPC synthase (PI (1-16:0, 2-18:1) ceramide-4 (C24))
IPC synthase (PI (1-16:1, 2-18:1) ceramide-4 (C24))
IPC synthase (PI (1-18:0, 2-18:1) ceramide-4 (C24))
IPC synthase (PI (1-18:1, 2-18:1) ceramide-4 (C24))
IPC synthase (PI (1-16:0, 2-16:1) ceramide-4 (C26))
IPC synthase (PI (1-16:1, 2-16:1) ceramide-4 (C26))
IPC synthase (PI (1-18:0, 2-16:1) ceramide-4 (C26))
IPC synthase (PI (1-18:1, 2-16:1) ceramide-4 (C26))
IPC synthase (PI (1-16:0, 2-18:1) ceramide-4 (C26))
IPC synthase (PI (1-16:1, 2-18:1) ceramide-4 (C26))
IPC synthase (PI (1-18:0, 2-18:1) ceramide-4 (C26))
IPC synthase (PI (1-18:1, 2-18:1) ceramide-4 (C26))

## Sheet: ess mets
(1->3)-beta-D-glucan [cell envelope]
1-phosphatidyl-1D-myo-inositol [cytoplasm]
14-demethyllanosterol [cytoplasm]
3-ketosphinganine [endoplasmic reticulum]
acetate [cytoplasm]
acetyl-CoA [cytoplasm]
bicarbonate [cytoplasm]
carbon dioxide [cytoplasm]
coenzyme A [cytoplasm]
complex sphingolipid [cytoplasm]
complex sphingolipid [Golgi]
CTP [cytoplasm]
D-mannose 1-phosphate [cytoplasm]
D-mannose 6-phosphate [cytoplasm]
dADP [cytoplasm]
dGDP [cytoplasm]
dolichyl D-mannosyl phosphate [endoplasmic reticulum]
dolichyl phosphate [cytoplasm]
dolichyl phosphate [endoplasmic reticulum]
episterol [cytoplasm]
ergosta-5,7,22,24(28)-tetraen-3beta-ol [cytoplasm]
ergosterol [cytoplasm]
ergosterol ester [cytoplasm]
fatty acid [cytoplasm]
fecosterol [cytoplasm]
GDP [cytoplasm]
GDP-alpha-D-mannose [cytoplasm]
GTP [cytoplasm]
H+ [endoplasmic reticulum]
L-alanine [cytoplasm]
L-arginine [cytoplasm]
L-asparagine [cytoplasm]
L-aspartate [cytoplasm]
L-cysteine [cytoplasm]
L-glutamate [cytoplasm]
L-glutamine [cytoplasm]
L-glycine [cytoplasm]
L-histidine [cytoplasm]
L-isoleucine [cytoplasm]
L-leucine [cytoplasm]
L-lysine [cytoplasm]
L-methionine [cytoplasm]
L-phenylalanine [cytoplasm]
L-proline [cytoplasm]
L-serine [cytoplasm]
L-serine [endoplasmic reticulum]
L-threonine [cytoplasm]
L-tryptophan [cytoplasm]
L-tyrosine [cytoplasm]
L-valine [cytoplasm]
lanosterol [cytoplasm]
malonyl-CoA [cytoplasm]
mannan [endoplasmic reticulum]
myo-inositol [cytoplasm]
NADPH [cytoplasm]
NADPH [endoplasmic reticulum]
palmitoyl-CoA [cytoplasm]
palmitoyl-CoA [endoplasmic reticulum]
phosphatidyl-L-serine [cytoplasm]
phosphatidylcholine [cytoplasm]
phosphatidylethanolamine [cytoplasm]
sphinganine [endoplasmic reticulum]
sulphate [extracellular]
triglyceride [cytoplasm]
UDP [cytoplasm]
UDP-D-glucose [cytoplasm]
UTP [cytoplasm]
zymosterol [cytoplasm]
TRX1 [cytoplasm]
TRX1 disulphide [cytoplasm]
malonyl-CoA [endoplasmic reticulum membrane]
H+ [endoplasmic reticulum membrane]
stearoyl-CoA [endoplasmic reticulum membrane]
3-oxoicosanoyl-CoA [endoplasmic reticulum membrane]
icosanoyl-CoA [endoplasmic reticulum membrane]
3-oxodocosanoyl-CoA [endoplasmic reticulum membrane]
docosanoyl-CoA [endoplasmic reticulum membrane]
3-oxotetracosanoyl-CoA [endoplasmic reticulum membrane]
tetracosanoyl-CoA [endoplasmic reticulum membrane]
NADPH [endoplasmic reticulum membrane]
3-hydroxyicosanoyl-CoA [endoplasmic reticulum membrane]
3-hydroxydocosanoyl-CoA [endoplasmic reticulum membrane]
3-hydroxytetracosanoyl-CoA [endoplasmic reticulum membrane]
trans-icos-2-enoyl-CoA [endoplasmic reticulum membrane]
trans-docos-2-enoyl-CoA [endoplasmic reticulum membrane]
trans-tetracos-2-enoyl-CoA [endoplasmic reticulum membrane]
CTP [endoplasmic reticulum membrane]
L-serine [endoplasmic reticulum membrane]
myo-inositol [endoplasmic reticulum membrane]
ergosterol [endoplasmic reticulum membrane]
ergosterol ester [endoplasmic reticulum membrane]
phosphatidyl-L-serine [endoplasmic reticulum membrane]
phosphatidylcholine [endoplasmic reticulum membrane]
phosphatidylethanolamine [endoplasmic reticulum membrane]
triglyceride [endoplasmic reticulum membrane]

## Sheet: non-ess mets
(2-amino-4-hydroxy-7,8-dihydropteridin-6-yl)methyl trihydrogen diphosphate [mitochondrion]
(2E)-3-(methoxycarbonyl)pent-2-enedioic acid [cytoplasm]
(2S)-2-isopropyl-3-oxosuccinate [mitochondrion]
(2S,3R)-3-hydroxybutane-1,2,3-tricarboxylic acid [mitochondrion]
(5S,6S)-di-HETE [cytoplasm]
(5S,6S)-di-HETE [nucleus]
(R)-4'-phosphopantothenic acid [cytoplasm]
(R)-carnitine [extracellular]
(R)-lactate [mitochondrion]
(R)-pantoate [cytoplasm]
(R)-pantothenate [cytoplasm]
(R)-pantothenate [extracellular]
(R)-S-lactoylglutathione [cytoplasm]
(R,R)-2,3-butanediol [cytoplasm]
(R)-3-hydroxyhexacosanoyl-CoA [peroxisome]
(S)-lactaldehyde [cytoplasm]
(S)-lactate [mitochondrion]
1-(sn-glycero-3-phospho)-1D-myo-inositol [cytoplasm]
1-(sn-glycero-3-phospho)-1D-myo-inositol [extracellular]
1-methylnicotinamide [cytoplasm]
1-pyrroline-3-hydroxy-5-carboxylic acid [mitochondrion]
1D-myo-inositol 1,3,4,5-tetrakisphosphate [nucleus]
1D-myo-inositol 1,4,5,6-tetrakisphosphate [nucleus]
1D-myo-inositol 1,4,5-trisphosphate [nucleus]
1D-myo-inositol 1-phosphate [endoplasmic reticulum]
1D-myo-inositol 3-phosphate [mitochondrion]
2'-deoxyuridine [cytoplasm]
2,3-bisphospho-D-glyceric acid [cytoplasm]
2-[3-carboxy-3-(methylammonio)propyl]-L-histidine [cytoplasm]
2-amino-3-carboxymuconate-6-semialdehyde [cytoplasm]
2-amino-6-(hydroxymethyl)-7,8-dihydropteridin-4-ol [mitochondrion]
2-dehydropantoate [cytoplasm]
2-dehydropantoate [mitochondrion]
2-deoxy-D-ribose 5-phosphate [cytoplasm]
2-hexaprenyl-5-hydroxy-6-methoxy-3-methyl-1,4-benzoquinone [mitochondrion]
2-hexaprenyl-6-methoxy-1,4-benzoquinone [mitochondrion]
2-hexaprenyl-6-methoxy-3-methyl-1,4-benzoquinone [mitochondrion]
2-hexaprenyl-6-methoxyphenol [mitochondrion]
2-hydroxyhexadecanal [endoplasmic reticulum]
2-methylbutanol [cytoplasm]
2-methylbutanol [mitochondrion]
2-methylbutyl acetate [cytoplasm]
2-methylbutyl acetate [extracellular]
2-methylcitrate [mitochondrion]
2-oxoglutarate [nucleus]
2-phenylethanol [cytoplasm]
2-phenylethanol [mitochondrion]
geranylgeranyl diphosphate [cytoplasm]
farnesyl diphosphate [mitochondrion]
3',5'-cyclic AMP [cytoplasm]
3'-dephospho-CoA [cytoplasm]
3'-dephospho-CoA [mitochondrion]
3-aminopropanal [cytoplasm]
3-hexaprenyl-4,5-dihydroxybenzoic acid [cytoplasm]
3-hexaprenyl-4,5-dihydroxybenzoic acid [mitochondrion]
3-hexaprenyl-4-hydroxy-5-methoxybenzoic acid [mitochondrion]
3-hexaprenyl-4-hydroxybenzoic acid [cytoplasm]
3-hexaprenyl-4-hydroxybenzoic acid [mitochondrion]
3-hydroxy-2-isopropyl-4-methoxy-4-oxobutanoate [cytoplasm]
3-hydroxy-L-kynurenine [cytoplasm]
3-hydroxyanthranilate [cytoplasm]
3-oxohexacosanoyl-CoA [peroxisome]
4,5-bis(diphospho)-1D-myo-inositol tetrakisphosphate [cytoplasm]
4-amino-2-methyl-5-diphosphomethylpyrimidine [cytoplasm]
4-amino-2-methyl-5-phosphomethylpyrimidine [cytoplasm]
4-amino-4-deoxychorismate [cytoplasm]
4-amino-5-hydroxymethyl-2-methylpyrimidine [cytoplasm]
4-aminobenzoate [cytoplasm]
4-aminobenzoate [extracellular]
4-aminobenzoate [mitochondrion]
4-aminobutanal [cytoplasm]
4-aminobutanal [mitochondrion]
4-diphospho-1D-myo-inositol pentakisphosphate [cytoplasm]
4-guanidinobutanoic acid [cytoplasm]
4-hydroxy-2-oxoglutarate [cytoplasm]
4-hydroxy-2-oxoglutarate [mitochondrion]
4-hydroxy-2-oxoglutarate [peroxisome]
4-hydroxy-L-threonine [cytoplasm]
4-hydroxybenzoate [cytoplasm]
4-hydroxybenzoate [mitochondrion]
4-methyl-2-oxopentanoate [mitochondrion]
4-methyl-5-(2-phosphonooxyethyl)thiazole [cytoplasm]
4-methylthio-2-oxobutanoate [cytoplasm]
5'-S-methyl-5'-thioadenosine [cytoplasm]
5,6,7,8-tetrahydrofolyl-L-glutamic acid [cytoplasm]
5,6-bis(diphospho)-1D-myo-inositol tetrakisphosphate [cytoplasm]
5-(2-hydroxyethyl)-4-methylthiazole [cytoplasm]
5-(methylsulfanyl)-2,3-dioxopentyl phosphate [cytoplasm]
5-aminolevulinate [cytoplasm]
5-aminolevulinate [mitochondrion]
5-formyltetrahydrofolic acid [cytoplasm]
5-formyltetrahydrofolic acid [extracellular]
5-formyltetrahydrofolic acid [mitochondrion]
6-(alpha-D-glucosaminyl)-1-phosphatidyl-1D-myo-inositol [endoplasmic reticulum]
6-(alpha-D-glucosaminyl)-O-acyl-1-phosphatidyl-1D-myo-inositol [endoplasmic reticulum]
6-(N-acetyl-alpha-D-glucosaminyl)-1-phosphatidyl-1D-myo-inositol [endoplasmic reticulum]
6-[6-(2-aminoethylphosphoryl)-alpha-mannosyl-(1->6)-2-(2-aminoethylphosphoryl)-alpha-mannosyl-(1->6)-alpha-2-(2-aminoethylphosphoryl)mannosyl-(1->4)-alpha-glucosaminyl]-O-acyl-1-phosphatidyl-1D-myo-inositol [endoplasmic reticulum]
6-diphospho-1D-myo-inositol pentakisphosphate [cytoplasm]
6-O-[alpha-D-mannosyl-(1->4)-alpha-D-glucosaminyl]-O-acyl-1-phosphatidyl-1D-myo-inositol [endoplasmic reticulum]
6-O-{2-O-[(2-aminoethyl)phosphoryl]-alpha-D-mannosyl-(1->4)-alpha-D-glucosaminyl}-O-acyl-1-phosphatidyl-1D-myo-inositol [endoplasmic reticulum]
6-O-{alpha-D-mannosyl-(1->2)-alpha-D-mannosyl-(1->6)-2-O-[(2-aminoethyl)phosphoryl]-alpha-D-mannosyl-(1->4)-alpha-D-glucosaminyl}-O-acyl-1-phosphatidyl-1D-myo-inositol [endoplasmic reticulum]
6-O-{alpha-D-mannosyl-(1->6)-2-O-[(2-aminoethyl)phosphoryl]-alpha-D-mannosyl-(1->4)-alpha-D-glucosaminyl}-O-acyl-1-phosphatidyl-1D-myo-inositol [endoplasmic reticulum]
7,8-diaminononanoate [cytoplasm]
7,8-diaminononanoate [extracellular]
7,8-dihydroneopterin [cytoplasm]
7,8-dihydroneopterin [mitochondrion]
7,8-dihydroneopterin 3'-phosphate [cytoplasm]
7,8-dihydroneopterin 3'-triphosphate [cytoplasm]
7,8-dihydropteroate [cytoplasm]
7,8-dihydropteroate [mitochondrion]
8-amino-7-oxononanoate [cytoplasm]
8-amino-7-oxononanoate [extracellular]
acetate [endoplasmic reticulum]
acetate [nucleus]
acetoacetyl-CoA [cytoplasm]
acetyl-ACP [mitochondrion]
acetyl-CoA [nucleus]
adenine [mitochondrion]
adenosine [mitochondrion]
adenosine 2'-phosphate [cytoplasm]
adenosine 3',5'-bismonophosphate [mitochondrion]
ADP [endoplasmic reticulum]
ADP [nucleus]
ADP-ribose [nucleus]
alpha-D-galactose 1-phosphate [cytoplasm]
alpha-D-glucosamine 1-phosphate [cytoplasm]
alpha-D-mannosyl-beta-D-mannosyldiacetylchitobiosyldiphosphodolichol [Golgi]
alpha-D-ribose 1-phosphate [mitochondrion]
aminoacetaldehyde [cytoplasm]
aminoacetone [cytoplasm]
AMP [nucleus]
Arg-tRNA(Arg) [mitochondrion]
Asn-tRNA(Asn) [mitochondrion]
Asp-tRNA(Asp) [mitochondrion]
ATP [endoplasmic reticulum]
ATP [nucleus]
beta-alanine [cytoplasm]
beta-D-fructose 2,6-bisphosphate [cytoplasm]
beta-D-mannosyldiacetylchitobiosyldiphosphodolichol [cytoplasm]
bicarbonate [mitochondrion]
bicarbonate [nucleus]
biotin [cytoplasm]
biotinyl-5'-AMP [cytoplasm]
carbon dioxide [endoplasmic reticulum]
carbon dioxide [mitochondrion]
carbon dioxide [nucleus]
carbon dioxide [peroxisome]
carboxyacetyl-ACP [mitochondrion]
CDP [nucleus]
CDP-choline [cytoplasm]
CDP-ethanolamine [cytoplasm]
ceramide-1 (C24) [endoplasmic reticulum]
ceramide-1 (C24) [Golgi]
ceramide-1 (C24) [mitochondrion]
ceramide-1 (C26) [endoplasmic reticulum]
ceramide-1 (C26) [Golgi]
ceramide-1 (C26) [mitochondrion]
ceramide-2 (C24) [endoplasmic reticulum]
ceramide-2 (C24) [Golgi]
ceramide-2 (C24) [mitochondrion]
ceramide-2 (C26) [endoplasmic reticulum]
ceramide-2 (C26) [Golgi]
ceramide-2 (C26) [mitochondrion]
ceramide-2' (C24) [endoplasmic reticulum]
ceramide-2' (C24) [Golgi]
ceramide-2' (C24) [mitochondrion]
ceramide-2' (C26) [endoplasmic reticulum]
ceramide-2' (C26) [Golgi]
ceramide-2' (C26) [mitochondrion]
ceramide-3 (C24) [endoplasmic reticulum]
ceramide-3 (C24) [Golgi]
ceramide-3 (C24) [mitochondrion]
ceramide-3 (C26) [endoplasmic reticulum]
ceramide-3 (C26) [Golgi]
ceramide-3 (C26) [mitochondrion]
ceramide-4 (C24) [endoplasmic reticulum]
ceramide-4 (C24) [Golgi]
ceramide-4 (C24) [mitochondrion]
ceramide-4 (C26) [endoplasmic reticulum]
ceramide-4 (C26) [Golgi]
ceramide-4 (C26) [mitochondrion]
cerotic acid [endoplasmic reticulum]
chitin [cytoplasm]
chitosan [cell envelope]
choline [cell envelope]
choline [cytoplasm]
choline phosphate [cytoplasm]
cis-aconitate [cytoplasm]
CMP [mitochondrion]
coenzyme A [lipid particle]
coenzyme A [nucleus]
complex sphingolipid [mitochondrion]
coproporphyrinogen III [cytoplasm]
CTP [mitochondrion]
D-arabinono-1,4-lactone [cytoplasm]
D-arabinose [cytoplasm]
D-arabinose [extracellular]
D-fructose 1,6-bisphosphate [cytoplasm]
D-fructose 1-phosphate [cytoplasm]
D-galactose [cytoplasm]
D-glucose [vacuole]
D-glyceraldehyde [cytoplasm]
D-mannose [cytoplasm]
D-xylulose [cytoplasm]
dADP [nucleus]
dATP [cytoplasm]
dCDP [nucleus]
dCTP [cytoplasm]
deamido-NAD(+) [cytoplasm]
deamido-NAD(+) [nucleus]
decaprenyl diphosphate [lipid particle]
dehydro-D-arabinono-1,4-lactone [cytoplasm]
Delta(6)-trans,Delta(8)-cis-leukotriene B4 [cytoplasm]
Delta(6)-trans,Delta(8)-cis-leukotriene B4 [nucleus]
dethiobiotin [cytoplasm]
dGDP [nucleus]
dGTP [cytoplasm]
dIDP [cytoplasm]
diglyceride [endoplasmic reticulum]
dihydrofolic acid [mitochondrion]
dihydroxyacetone phosphate [lipid particle]
diphosphate [lipid particle]
diphosphate [nucleus]
dITP [cytoplasm]
docosaprenyl diphosphate [lipid particle]
dodecaprenyl diphosphate [lipid particle]
dolichol [lipid particle]
dTTP [cytoplasm]
dUDP [cytoplasm]
dUDP [nucleus]
dUMP [nucleus]
dUTP [cytoplasm]
ergosterol [cell envelope]
ergosterol [lipid particle]
ergosterol 3-beta-D-glucoside [cytoplasm]
erythro-4-hydroxy-L-glutamic acid [cytoplasm]
erythro-4-hydroxy-L-glutamic acid [mitochondrion]
erythro-4-hydroxy-L-glutamic acid [peroxisome]
ethanolamine [cytoplasm]
ethanolamine [extracellular]
ethyl acetate [cytoplasm]
ethyl acetate [extracellular]
FAD [cytoplasm]
FADH2 [cytoplasm]
fecosterol [cell envelope]
fecosterol [lipid particle]
ferroheme b [mitochondrion]
fMet-tRNA(fMet) [mitochondrion]
FMN [cytoplasm]
FMN [mitochondrion]
FMNH2 [cytoplasm]
folic acid [cytoplasm]
folic acid [extracellular]
gamma-aminobutyrate [mitochondrion]
GDP [Golgi]
GDP [mitochondrion]
GDP [nucleus]
GDP-alpha-D-mannose [Golgi]
geranylgeranyl diphosphate [lipid particle]
Glu-tRNA(Glu) [mitochondrion]
glutathione [cytoplasm]
glutathione [mitochondrion]
glutathione [vacuole]
glutathione disulfide [cytoplasm]
glutathione disulfide [mitochondrion]
glycerol 3-phosphate [lipid particle]
glycerone [cytoplasm]
glycogen [vacuole]
glycolaldehyde [cytoplasm]
glycolaldehyde [extracellular]
glycolaldehyde [mitochondrion]
GMP [Golgi]
GTP [mitochondrion]
guanine [mitochondrion]
guanosine [mitochondrion]
H+ [cell envelope]
H+ [Golgi]
H+ [lipid particle]
H+ [nucleus]
H+ [vacuole]
H2O [endoplasmic reticulum]
H2O [Golgi]
H2O [nucleus]
H2O [vacuole]
heme a [mitochondrion]
heme o [mitochondrion]
henicosaprenyl diphosphate [lipid particle]
heptadecaprenyl diphosphate [lipid particle]
heptaprenyl diphosphate [lipid particle]
hexacosanoyl-CoA [cytoplasm]
hexacosanoyl-CoA [endoplasmic reticulum]
hexacosanoyl-CoA [peroxisome]
hexadecanal [endoplasmic reticulum]
hexadecaprenyl diphosphate [lipid particle]
hexaprenyl diphosphate [lipid particle]
hexaprenyl diphosphate [mitochondrion]
His-tRNA(His) [mitochondrion]
homocitrate [nucleus]
hydrogen peroxide [cytoplasm]
hydrogen peroxide [mitochondrion]
hydrogen peroxide [nucleus]
icosaprenyl diphosphate [lipid particle]
IDP [cytoplasm]
Ile-tRNA(Ile) [mitochondrion]
indole-3-acetate [cytoplasm]
indole-3-acetate [mitochondrion]
indole-3-pyruvate [cytoplasm]
inositol phosphomannosylinositol phosphoceramide [endoplasmic reticulum]
inositol phosphomannosylinositol phosphoceramide [Golgi]
inositol phosphomannosylinositol phosphoceramide [mitochondrion]
inositol phosphomannosylinositol phosphoceramide A (C24) [endoplasmic reticulum]
inositol phosphomannosylinositol phosphoceramide A (C24) [Golgi]
inositol phosphomannosylinositol phosphoceramide A (C26) [endoplasmic reticulum]
inositol phosphomannosylinositol phosphoceramide A (C26) [Golgi]
inositol phosphomannosylinositol phosphoceramide B (C24) [endoplasmic reticulum]
inositol phosphomannosylinositol phosphoceramide B (C24) [Golgi]
inositol phosphomannosylinositol phosphoceramide B (C26) [endoplasmic reticulum]
inositol phosphomannosylinositol phosphoceramide B (C26) [Golgi]
inositol phosphomannosylinositol phosphoceramide B' (C24) [endoplasmic reticulum]
inositol phosphomannosylinositol phosphoceramide B' (C24) [Golgi]
inositol phosphomannosylinositol phosphoceramide B' (C26) [endoplasmic reticulum]
inositol phosphomannosylinositol phosphoceramide B' (C26) [Golgi]
inositol phosphomannosylinositol phosphoceramide C (C24) [endoplasmic reticulum]
inositol phosphomannosylinositol phosphoceramide C (C24) [Golgi]
inositol phosphomannosylinositol phosphoceramide C (C26) [endoplasmic reticulum]
inositol phosphomannosylinositol phosphoceramide C (C26) [Golgi]
inositol phosphomannosylinositol phosphoceramide D (C24) [endoplasmic reticulum]
inositol phosphomannosylinositol phosphoceramide D (C24) [Golgi]
inositol phosphomannosylinositol phosphoceramide D (C26) [endoplasmic reticulum]
inositol phosphomannosylinositol phosphoceramide D (C26) [Golgi]
inositol-P-ceramide [endoplasmic reticulum]
inositol-P-ceramide [Golgi]
inositol-P-ceramide [mitochondrion]
inositol-P-ceramide A (C24) [endoplasmic reticulum]
inositol-P-ceramide A (C24) [Golgi]
inositol-P-ceramide A (C26) [endoplasmic reticulum]
inositol-P-ceramide A (C26) [Golgi]
inositol-P-ceramide B (C24) [endoplasmic reticulum]
inositol-P-ceramide B (C24) [Golgi]
inositol-P-ceramide B (C26) [endoplasmic reticulum]
inositol-P-ceramide B (C26) [Golgi]
inositol-P-ceramide B' (C24) [endoplasmic reticulum]
inositol-P-ceramide B' (C24) [Golgi]
inositol-P-ceramide B' (C26) [endoplasmic reticulum]
inositol-P-ceramide B' (C26) [Golgi]
inositol-P-ceramide C (C24) [endoplasmic reticulum]
inositol-P-ceramide C (C24) [Golgi]
inositol-P-ceramide C (C26) [endoplasmic reticulum]
inositol-P-ceramide C (C26) [Golgi]
inositol-P-ceramide D (C24) [endoplasmic reticulum]
inositol-P-ceramide D (C24) [Golgi]
inositol-P-ceramide D (C26) [endoplasmic reticulum]
inositol-P-ceramide D (C26) [Golgi]
iron [cytoplasm]
iron [extracellular]
iron [mitochondrion]
isoamyl acetate [cytoplasm]
isoamyl acetate [extracellular]
isoamylol [cytoplasm]
isoamylol [mitochondrion]
isobutanol [cytoplasm]
isobutanol [mitochondrion]
isobutyl acetate [cytoplasm]
isobutyl acetate [extracellular]
isopentenyl diphosphate [lipid particle]
isopentenyl diphosphate [mitochondrion]
itaconate [mitochondrion]
itaconyl-CoA [mitochondrion]
ITP [cytoplasm]
L-2-amino-3-oxobutanoate [cytoplasm]
L-4-hydroxyglutamic semialdehyde [mitochondrion]
L-alanine [mitochondrion]
L-allothreonine [cytoplasm]
L-alpha-formylglycine [cytoplasm]
L-arabinitol [cytoplasm]
L-arginine [mitochondrion]
L-arginine [vacuole]
L-asparagine [mitochondrion]
L-asparagine [vacuole]
L-cysteinylglycine [cytoplasm]
L-cystine [cytoplasm]
L-gamma-glutamyl-L-alanine [cytoplasm]
L-gamma-glutamyl-L-cysteine [cytoplasm]
L-glutamate [nucleus]
L-glutamine [nucleus]
L-glutamine [vacuole]
L-histidine [mitochondrion]
L-histidine [vacuole]
L-isoleucine [mitochondrion]
L-isoleucine [vacuole]
L-kynurenine [cytoplasm]
L-leucine [mitochondrion]
L-leucine [vacuole]
L-lysine [mitochondrion]
L-lysine [vacuole]
L-phenylalanine [mitochondrion]
L-serine [mitochondrion]
L-sorbose [cytoplasm]
L-threonine [mitochondrion]
L-tryptophan [mitochondrion]
L-tyrosine [mitochondrion]
L-tyrosine [peroxisome]
L-tyrosine [vacuole]
lauroyl-CoA [cytoplasm]
Leu-tRNA(Leu) [mitochondrion]
leukotriene A4 [cytoplasm]
leukotriene A4 [nucleus]
leukotriene B4 [cytoplasm]
leukotriene B4 [nucleus]
lignoceric acid [endoplasmic reticulum]
Lys-tRNA(Lys) [mitochondrion]
malonyl-CoA [mitochondrion]
mannose-(1D-myo-inositol 1-phosphate)2 [endoplasmic reticulum]
mannose-(1D-myo-inositol 1-phosphate)2 [mitochondrion]
mannose-1D-myo-inositol 1-phosphate [endoplasmic reticulum]
mannose-1D-myo-inositol 1-phosphate [mitochondrion]
mannosylinositol phosphorylceramide [endoplasmic reticulum]
mannosylinositol phosphorylceramide [Golgi]
mannosylinositol phosphorylceramide [mitochondrion]
mannosylinositol phosphorylceramide A (C24) [endoplasmic reticulum]
mannosylinositol phosphorylceramide A (C24) [Golgi]
mannosylinositol phosphorylceramide A (C26) [endoplasmic reticulum]
mannosylinositol phosphorylceramide A (C26) [Golgi]
mannosylinositol phosphorylceramide B (C24) [endoplasmic reticulum]
mannosylinositol phosphorylceramide B (C24) [Golgi]
mannosylinositol phosphorylceramide B (C26) [endoplasmic reticulum]
mannosylinositol phosphorylceramide B (C26) [Golgi]
mannosylinositol phosphorylceramide B' (C24) [endoplasmic reticulum]
mannosylinositol phosphorylceramide B' (C24) [Golgi]
mannosylinositol phosphorylceramide B' (C26) [endoplasmic reticulum]
mannosylinositol phosphorylceramide B' (C26) [Golgi]
mannosylinositol phosphorylceramide C (C24) [endoplasmic reticulum]
mannosylinositol phosphorylceramide C (C24) [Golgi]
mannosylinositol phosphorylceramide C (C26) [endoplasmic reticulum]
mannosylinositol phosphorylceramide C (C26) [Golgi]
mannosylinositol phosphorylceramide D (C24) [endoplasmic reticulum]
mannosylinositol phosphorylceramide D (C24) [Golgi]
mannosylinositol phosphorylceramide D (C26) [endoplasmic reticulum]
mannosylinositol phosphorylceramide D (C26) [Golgi]
Met-tRNA(Met) [mitochondrion]
methylglyoxal [cytoplasm]
myo-inositol 1,3,4,5,6-pentakisphosphate [cytoplasm]
myo-inositol 1,3,4,5,6-pentakisphosphate [nucleus]
myo-inositol hexakisphosphate [nucleus]
myristoyl-CoA [cytoplasm]
N(1)-acetylspermidine [cytoplasm]
N(1)-acetylspermine [cytoplasm]
N(pros)-methyl-L-histidine [cytoplasm]
N,N'-diformyldityrosine [cytoplasm]
N-[(R)-4-phosphonopantothenoyl]-L-cysteine [cytoplasm]
N-acetyl-alpha-D-glucosamine 1-phosphate [cytoplasm]
N-acetyl-D-glucosamine 6-phosphate [cytoplasm]
N-acetylputrescine [cytoplasm]
N-formyl-L-kynurenine [cytoplasm]
N-formyl-L-tyrosine [cytoplasm]
NAD [endoplasmic reticulum]
NAD [nucleus]
nicotinamide [cytoplasm]
nicotinamide [nucleus]
nicotinate [cytoplasm]
nicotinate [extracellular]
nicotinic acid D-ribonucleotide [cytoplasm]
nicotinic acid D-ribonucleotide [mitochondrion]
NMN [cytoplasm]
NMN [nucleus]
NMN [peroxisome]
nonadecaprenyl diphosphate [lipid particle]
nonaprenyl 4-hydroxybenzoate [cytoplasm]
nonaprenyl diphosphate [cytoplasm]
nonaprenyl diphosphate [lipid particle]
O-acetyl-L-serine [cytoplasm]
O-phosphoethanolamine [cytoplasm]
O-phosphoethanolamine [endoplasmic reticulum]
O-succinyl-L-homoserine [cytoplasm]
octadecaprenyl diphosphate [lipid particle]
octanoate [cytoplasm]
octanoate [peroxisome]
octanoyl-ACP [mitochondrion]
octaprenyl diphosphate [lipid particle]
oleoyl-CoA [cytoplasm]
P(1),P(4)-bis(5'-adenosyl) tetraphosphate [cytoplasm]
P(1),P(4)-bis(5'-guanosyl) tetraphosphate [cytoplasm]
P1-(5'-adenosyl),P4-(5'-guanosyl) tetraphosphate [cytoplasm]
pantetheine 4'-phosphate [cytoplasm]
pantetheine 4'-phosphate [mitochondrion]
pentadecaprenyl diphosphate [lipid particle]
pentaprenyl diphosphate [cytoplasm]
pentaprenyl diphosphate [lipid particle]
pentaprenyl diphosphate [mitochondrion]
Phe-tRNA(Phe) [mitochondrion]
phenethyl acetate [cytoplasm]
phenethyl acetate [extracellular]
phenylacetic acid [cytoplasm]
phosphate [endoplasmic reticulum]
phosphate [Golgi]
phosphate [vacuole]
phosphatidylethanolamine [endoplasmic reticulum]
phytosphingosine [endoplasmic reticulum]
phytosphingosine 1-phosphate [endoplasmic reticulum]
polysulphur [cytoplasm]
porphobilinogen [cytoplasm]
potassium [cytoplasm]
potassium [extracellular]
precorrin-2 [cytoplasm]
preuroporphyrinogen [cytoplasm]
protoporphyrin [mitochondrion]
protoporphyrinogen [cytoplasm]
protoporphyrinogen [mitochondrion]
PRPP [mitochondrion]
pseudouridine 5'-phosphate [cytoplasm]
putrescine [vacuole]
pyridoxal [cytoplasm]
pyridoxal 5'-phosphate [cytoplasm]
pyridoxamine [cytoplasm]
pyridoxamine 5'-phosphate [cytoplasm]
pyridoxine [cytoplasm]
pyridoxine [extracellular]
pyridoxine 5'-phosphate [cytoplasm]
quinolinate [cytoplasm]
quinolinate [mitochondrion]
riboflavin [mitochondrion]
S(8)-aminomethyldihydrolipoamide [mitochondrion]
S-adenosyl-4-methylthio-2-oxobutanoate [cytoplasm]
S-adenosyl-L-homocysteine [mitochondrion]
S-adenosyl-L-methionine [mitochondrion]
S-adenosylmethioninamine [cytoplasm]
S-formylglutathione [cytoplasm]
S-methyl-5-thio-alpha-D-ribose 1-phosphate [cytoplasm]
S-methyl-5-thio-D-ribulose 1-phosphate [cytoplasm]
S-methyl-L-methionine [cytoplasm]
sedoheptulose 1,7-bisphosphate [cytoplasm]
siroheme [cytoplasm]
sirohydrochlorin [cytoplasm]
sn-glycero-3-phosphocholine [cell envelope]
sn-glycero-3-phosphocholine [cytoplasm]
sn-glycero-3-phosphocholine [extracellular]
sodium [cytoplasm]
sodium [extracellular]
spermidine [vacuole]
spermine [cytoplasm]
spermine [extracellular]
spermine [vacuole]
sphinganine 1-phosphate [endoplasmic reticulum]
stearoyl-CoA [cytoplasm]
sulphite [extracellular]
taurine [cytoplasm]
taurine [extracellular]
taurocholic acid [vacuole]
TDP [cytoplasm]
TDP [mitochondrion]
tetracosanoyl-CoA [cytoplasm]
tetracosanoyl-CoA [endoplasmic reticulum]
tetracosanoyl-CoA [peroxisome]
tetradecaprenyl diphosphate [lipid particle]
tetrahydropteroyltri-L-glutamic acid [cytoplasm]
thiamine [cytoplasm]
Thr-tRNA(Thr) [mitochondrion]
thymine [cytoplasm]
TMP [cytoplasm]
trans-aconitate [cytoplasm]
trans-aconitate [mitochondrion]
trans-hexacos-2-enoyl-CoA [peroxisome]
trehalose [vacuole]
tridecaprenyl diphosphate [lipid particle]
trimethylenediamine [cytoplasm]
Trp-tRNA(Trp) [mitochondrion]
tryptophol [cytoplasm]
tryptophol [mitochondrion]
TTP [cytoplasm]
Tyr-tRNA(Tyr) [mitochondrion]
UDP [nucleus]
UDP-D-galactose [cytoplasm]
UDP-D-galactose [Golgi]
UDP-N-acetyl-alpha-D-glucosamine [cytoplasm]
UMP [Golgi]
UMP [nucleus]
undecaprenyl diphosphate [lipid particle]
uroporphyrinogen III [cytoplasm]
UTP [mitochondrion]
Val-tRNA(Val) [mitochondrion]
zymosterol [lipid particle]
TRX1 [mitochondrion]
TRX1 disulphide [mitochondrion]
TRX1 disulphide [nucleus]
kynurenic acid [cytoplasm]
quinaldic acid [cytoplasm]
ACP1 [mitochondrion]
acetoacetyl-ACP [mitochondrion]
butanoyl-ACP [mitochondrion]
3-oxo-hexanoyl-ACP [mitochondrion]
hexanoyl-ACP [mitochondrion]
3-oxo-octanoyl-ACP [mitochondrion]
3-hydroxybutanoyl-ACP [mitochondrion]
3-hydroxyhexanoyl-ACP [mitochondrion]
3-hydroxyoctanoyl-ACP [mitochondrion]
trans-but-2-enoyl-ACP [mitochondrion]
trans-hex-2-enoyl-ACP [mitochondrion]
trans-oct-2-enoyl-ACP [mitochondrion]
carbon dioxide [endoplasmic reticulum membrane]
3-oxooctadecanoyl-CoA [endoplasmic reticulum membrane]
3-oxohexacosanoyl-CoA [endoplasmic reticulum membrane]
3-hydroxyoctadecanoyl-CoA [endoplasmic reticulum membrane]
(S)-3-hydroxyhexacosanoyl-CoA [endoplasmic reticulum membrane]
trans-octadec-2-enoyl-CoA [endoplasmic reticulum membrane]
trans-hexacos-2-enoyl-CoA [endoplasmic reticulum membrane]
hexacosanoyl-CoA [endoplasmic reticulum membrane]
butyrate [extracellular]
hexanoate [extracellular]
butyrate [cytoplasm]
hexanoate [cytoplasm]
ATP [endoplasmic reticulum membrane]
AMP [endoplasmic reticulum membrane]
diphosphate [endoplasmic reticulum membrane]
myristate [endoplasmic reticulum membrane]
palmitate [endoplasmic reticulum membrane]
palmitoleate [endoplasmic reticulum membrane]
stearate [endoplasmic reticulum membrane]
oleate [endoplasmic reticulum membrane]
ATP [lipid particle]
laurate [lipid particle]
AMP [lipid particle]
lauroyl-CoA [lipid particle]
myristate [lipid particle]
myristoyl-CoA [lipid particle]
palmitate [lipid particle]
palmitoyl-CoA [lipid particle]
palmitoleate [lipid particle]
palmitoleoyl-CoA [lipid particle]
stearate [lipid particle]
stearoyl-CoA [lipid particle]
oleate [lipid particle]
oleoyl-CoA [lipid particle]
ATP [cell envelope]
coenzyme A [cell envelope]
arachidate [cell envelope]
AMP [cell envelope]
diphosphate [cell envelope]
icosanoyl-CoA [cell envelope]
behenate [cell envelope]
docosanoyl-CoA [cell envelope]
lignoceric acid [cell envelope]
tetracosanoyl-CoA [cell envelope]
cerotic acid [cell envelope]
hexacosanoyl-CoA [cell envelope]
behenate [endoplasmic reticulum membrane]
lignoceric acid [endoplasmic reticulum membrane]
cerotic acid [endoplasmic reticulum membrane]
behenate [lipid particle]
docosanoyl-CoA [lipid particle]
lignoceric acid [lipid particle]
tetracosanoyl-CoA [lipid particle]
cerotic acid [lipid particle]
hexacosanoyl-CoA [lipid particle]
palmitoleoyl-CoA [cytoplasm]
icosanoyl-CoA [cytoplasm]
icosanoyl-CoA [peroxisome]
docosanoyl-CoA [cytoplasm]
docosanoyl-CoA [peroxisome]
butyrate [peroxisome]
hexanoate [peroxisome]
trans-icos-2-enoyl-CoA [peroxisome]
trans-docos-2-enoyl-CoA [peroxisome]
trans-tetracos-2-enoyl-CoA [peroxisome]
(R)-3-hydroxyicosanoyl-CoA [peroxisome]
(R)-3-hydroxydocosanoyl-CoA [peroxisome]
(R)-3-hydroxytetracosanoyl-CoA [peroxisome]
3-oxoicosanoyl-CoA [peroxisome]
3-oxodocosanoyl-CoA [peroxisome]
3-oxotetracosanoyl-CoA [peroxisome]
glycerol 3-phosphate [endoplasmic reticulum membrane]
1-acyl-sn-glycerol 3-phosphate (16:0) [endoplasmic reticulum membrane]
1-acyl-sn-glycerol 3-phosphate (16:1) [endoplasmic reticulum membrane]
1-acyl-sn-glycerol 3-phosphate (18:0) [endoplasmic reticulum membrane]
1-acyl-sn-glycerol 3-phosphate (18:1) [endoplasmic reticulum membrane]
dihydroxyacetone phosphate [endoplasmic reticulum membrane]
acylglycerone phosphate (16:0) [endoplasmic reticulum membrane]
acylglycerone phosphate (16:1) [endoplasmic reticulum membrane]
acylglycerone phosphate (18:0) [endoplasmic reticulum membrane]
acylglycerone phosphate (18:1) [endoplasmic reticulum membrane]
1-acyl-sn-glycerol 3-phosphate (16:0) [lipid particle]
1-acyl-sn-glycerol 3-phosphate (16:1) [lipid particle]
1-acyl-sn-glycerol 3-phosphate (18:0) [lipid particle]
1-acyl-sn-glycerol 3-phosphate (18:1) [lipid particle]
acylglycerone phosphate (16:0) [lipid particle]
acylglycerone phosphate (16:1) [lipid particle]
acylglycerone phosphate (18:0) [lipid particle]
acylglycerone phosphate (18:1) [lipid particle]
NADPH [lipid particle]
NADP(+) [lipid particle]
phosphatidate (1-16:0, 2-16:1) [endoplasmic reticulum membrane]
phosphatidate (1-16:0, 2-18:1) [endoplasmic reticulum membrane]
phosphatidate (1-16:1, 2-16:1) [endoplasmic reticulum membrane]
phosphatidate (1-16:1, 2-18:1) [endoplasmic reticulum membrane]
phosphatidate (1-18:0, 2-16:1) [endoplasmic reticulum membrane]
phosphatidate (1-18:0, 2-18:1) [endoplasmic reticulum membrane]
phosphatidate (1-18:1, 2-16:1) [endoplasmic reticulum membrane]
phosphatidate (1-18:1, 2-18:1) [endoplasmic reticulum membrane]
phosphatidate (1-16:0, 2-18:1) [lipid particle]
phosphatidate (1-16:1, 2-18:1) [lipid particle]
phosphatidate (1-18:0, 2-18:1) [lipid particle]
phosphatidate (1-18:1, 2-18:1) [lipid particle]
phosphate [endoplasmic reticulum membrane]
diglyceride (1-16:0, 2-16:1) [endoplasmic reticulum membrane]
diglyceride (1-16:0, 2-18:1) [endoplasmic reticulum membrane]
diglyceride (1-16:1, 2-16:1) [endoplasmic reticulum membrane]
diglyceride (1-16:1, 2-18:1) [endoplasmic reticulum membrane]
diglyceride (1-18:0, 2-16:1) [endoplasmic reticulum membrane]
diglyceride (1-18:0, 2-18:1) [endoplasmic reticulum membrane]
diglyceride (1-18:1, 2-16:1) [endoplasmic reticulum membrane]
diglyceride (1-18:1, 2-18:1) [endoplasmic reticulum membrane]
phosphatidate (1-16:0, 2-16:1) [vacuolar membrane]
H2O [vacuolar membrane]
phosphate [vacuolar membrane]
diglyceride (1-16:0, 2-16:1) [vacuolar membrane]
phosphatidate (1-16:0, 2-18:1) [vacuolar membrane]
diglyceride (1-16:0, 2-18:1) [vacuolar membrane]
phosphatidate (1-16:1, 2-16:1) [vacuolar membrane]
diglyceride (1-16:1, 2-16:1) [vacuolar membrane]
phosphatidate (1-16:1, 2-18:1) [vacuolar membrane]
diglyceride (1-16:1, 2-18:1) [vacuolar membrane]
phosphatidate (1-18:0, 2-16:1) [vacuolar membrane]
diglyceride (1-18:0, 2-16:1) [vacuolar membrane]
phosphatidate (1-18:0, 2-18:1) [vacuolar membrane]
diglyceride (1-18:0, 2-18:1) [vacuolar membrane]
phosphatidate (1-18:1, 2-16:1) [vacuolar membrane]
diglyceride (1-18:1, 2-16:1) [vacuolar membrane]
phosphatidate (1-18:1, 2-18:1) [vacuolar membrane]
diglyceride (1-18:1, 2-18:1) [vacuolar membrane]
phosphatidate (1-16:0, 2-16:1) [Golgi membrane]
H2O [Golgi membrane]
phosphate [Golgi membrane]
diglyceride (1-16:0, 2-16:1) [Golgi membrane]
phosphatidate (1-16:0, 2-18:1) [Golgi membrane]
diglyceride (1-16:0, 2-18:1) [Golgi membrane]
phosphatidate (1-16:1, 2-16:1) [Golgi membrane]
diglyceride (1-16:1, 2-16:1) [Golgi membrane]
phosphatidate (1-16:1, 2-18:1) [Golgi membrane]
diglyceride (1-16:1, 2-18:1) [Golgi membrane]
phosphatidate (1-18:0, 2-16:1) [Golgi membrane]
diglyceride (1-18:0, 2-16:1) [Golgi membrane]
phosphatidate (1-18:0, 2-18:1) [Golgi membrane]
diglyceride (1-18:0, 2-18:1) [Golgi membrane]
phosphatidate (1-18:1, 2-16:1) [Golgi membrane]
diglyceride (1-18:1, 2-16:1) [Golgi membrane]
phosphatidate (1-18:1, 2-18:1) [Golgi membrane]
diglyceride (1-18:1, 2-18:1) [Golgi membrane]
triglyceride (1-16:0, 2-16:1, 3-16:0) [endoplasmic reticulum membrane]
triglyceride (1-16:0, 2-18:1, 3-16:0) [endoplasmic reticulum membrane]
triglyceride (1-16:1, 2-16:1, 3-16:0) [endoplasmic reticulum membrane]
triglyceride (1-16:1, 2-18:1, 3-16:0) [endoplasmic reticulum membrane]
triglyceride (1-18:0, 2-16:1, 3-16:0) [endoplasmic reticulum membrane]
triglyceride (1-18:0, 2-18:1, 3-16:0) [endoplasmic reticulum membrane]
triglyceride (1-18:1, 2-16:1, 3-16:0) [endoplasmic reticulum membrane]
triglyceride (1-18:1, 2-18:1, 3-16:0) [endoplasmic reticulum membrane]
triglyceride (1-16:0, 2-16:1, 3-16:1) [endoplasmic reticulum membrane]
triglyceride (1-16:0, 2-18:1, 3-16:1) [endoplasmic reticulum membrane]
triglyceride (1-16:1, 2-16:1, 3-16:1) [endoplasmic reticulum membrane]
triglyceride (1-16:1, 2-18:1, 3-16:1) [endoplasmic reticulum membrane]
triglyceride (1-18:0, 2-16:1, 3-16:1) [endoplasmic reticulum membrane]
triglyceride (1-18:0, 2-18:1, 3-16:1) [endoplasmic reticulum membrane]
triglyceride (1-18:1, 2-16:1, 3-16:1) [endoplasmic reticulum membrane]
triglyceride (1-18:1, 2-18:1, 3-16:1) [endoplasmic reticulum membrane]
triglyceride (1-16:0, 2-16:1, 3-18:0) [endoplasmic reticulum membrane]
triglyceride (1-16:0, 2-18:1, 3-18:0) [endoplasmic reticulum membrane]
triglyceride (1-16:1, 2-16:1, 3-18:0) [endoplasmic reticulum membrane]
triglyceride (1-16:1, 2-18:1, 3-18:0) [endoplasmic reticulum membrane]
triglyceride (1-18:0, 2-16:1, 3-18:0) [endoplasmic reticulum membrane]
triglyceride (1-18:0, 2-18:1, 3-18:0) [endoplasmic reticulum membrane]
triglyceride (1-18:1, 2-16:1, 3-18:0) [endoplasmic reticulum membrane]
triglyceride (1-18:1, 2-18:1, 3-18:0) [endoplasmic reticulum membrane]
triglyceride (1-16:0, 2-16:1, 3-18:1) [endoplasmic reticulum membrane]
triglyceride (1-16:0, 2-18:1, 3-18:1) [endoplasmic reticulum membrane]
triglyceride (1-16:1, 2-16:1, 3-18:1) [endoplasmic reticulum membrane]
triglyceride (1-16:1, 2-18:1, 3-18:1) [endoplasmic reticulum membrane]
triglyceride (1-18:0, 2-16:1, 3-18:1) [endoplasmic reticulum membrane]
triglyceride (1-18:0, 2-18:1, 3-18:1) [endoplasmic reticulum membrane]
triglyceride (1-18:1, 2-16:1, 3-18:1) [endoplasmic reticulum membrane]
triglyceride (1-18:1, 2-18:1, 3-18:1) [endoplasmic reticulum membrane]
diglyceride (1-16:0, 2-16:1) [lipid particle]
triglyceride (1-16:0, 2-16:1, 3-16:0) [lipid particle]
diglyceride (1-16:0, 2-18:1) [lipid particle]
triglyceride (1-16:0, 2-18:1, 3-16:0) [lipid particle]
diglyceride (1-16:1, 2-16:1) [lipid particle]
triglyceride (1-16:1, 2-16:1, 3-16:0) [lipid particle]
diglyceride (1-16:1, 2-18:1) [lipid particle]
triglyceride (1-16:1, 2-18:1, 3-16:0) [lipid particle]
diglyceride (1-18:0, 2-16:1) [lipid particle]
triglyceride (1-18:0, 2-16:1, 3-16:0) [lipid particle]
diglyceride (1-18:0, 2-18:1) [lipid particle]
triglyceride (1-18:0, 2-18:1, 3-16:0) [lipid particle]
diglyceride (1-18:1, 2-16:1) [lipid particle]
triglyceride (1-18:1, 2-16:1, 3-16:0) [lipid particle]
diglyceride (1-18:1, 2-18:1) [lipid particle]
triglyceride (1-18:1, 2-18:1, 3-16:0) [lipid particle]
triglyceride (1-16:0, 2-16:1, 3-16:1) [lipid particle]
triglyceride (1-16:0, 2-18:1, 3-16:1) [lipid particle]
triglyceride (1-16:1, 2-16:1, 3-16:1) [lipid particle]
triglyceride (1-16:1, 2-18:1, 3-16:1) [lipid particle]
triglyceride (1-18:0, 2-16:1, 3-16:1) [lipid particle]
triglyceride (1-18:0, 2-18:1, 3-16:1) [lipid particle]
triglyceride (1-18:1, 2-16:1, 3-16:1) [lipid particle]
triglyceride (1-18:1, 2-18:1, 3-16:1) [lipid particle]
triglyceride (1-16:0, 2-16:1, 3-18:0) [lipid particle]
triglyceride (1-16:0, 2-18:1, 3-18:0) [lipid particle]
triglyceride (1-16:1, 2-16:1, 3-18:0) [lipid particle]
triglyceride (1-16:1, 2-18:1, 3-18:0) [lipid particle]
triglyceride (1-18:0, 2-16:1, 3-18:0) [lipid particle]
triglyceride (1-18:0, 2-18:1, 3-18:0) [lipid particle]
triglyceride (1-18:1, 2-16:1, 3-18:0) [lipid particle]
triglyceride (1-18:1, 2-18:1, 3-18:0) [lipid particle]
triglyceride (1-16:0, 2-16:1, 3-18:1) [lipid particle]
triglyceride (1-16:0, 2-18:1, 3-18:1) [lipid particle]
triglyceride (1-16:1, 2-16:1, 3-18:1) [lipid particle]
triglyceride (1-16:1, 2-18:1, 3-18:1) [lipid particle]
triglyceride (1-18:0, 2-16:1, 3-18:1) [lipid particle]
triglyceride (1-18:0, 2-18:1, 3-18:1) [lipid particle]
triglyceride (1-18:1, 2-16:1, 3-18:1) [lipid particle]
triglyceride (1-18:1, 2-18:1, 3-18:1) [lipid particle]
CDP-diacylglycerol (1-16:0, 2-16:1) [endoplasmic reticulum membrane]
CDP-diacylglycerol (1-16:1, 2-16:1) [endoplasmic reticulum membrane]
CDP-diacylglycerol (1-18:0, 2-16:1) [endoplasmic reticulum membrane]
CDP-diacylglycerol (1-18:1, 2-16:1) [endoplasmic reticulum membrane]
CDP-diacylglycerol (1-16:0, 2-18:1) [endoplasmic reticulum membrane]
CDP-diacylglycerol (1-16:1, 2-18:1) [endoplasmic reticulum membrane]
CDP-diacylglycerol (1-18:0, 2-18:1) [endoplasmic reticulum membrane]
CDP-diacylglycerol (1-18:1, 2-18:1) [endoplasmic reticulum membrane]
phosphatidate (1-16:0, 2-16:1) [mitochondrial membrane]
CTP [mitochondrial membrane]
H+ [mitochondrial membrane]
diphosphate [mitochondrial membrane]
CDP-diacylglycerol (1-16:0, 2-16:1) [mitochondrial membrane]
phosphatidate (1-16:1, 2-16:1) [mitochondrial membrane]
CDP-diacylglycerol (1-16:1, 2-16:1) [mitochondrial membrane]
phosphatidate (1-18:0, 2-16:1) [mitochondrial membrane]
CDP-diacylglycerol (1-18:0, 2-16:1) [mitochondrial membrane]
phosphatidate (1-18:1, 2-16:1) [mitochondrial membrane]
CDP-diacylglycerol (1-18:1, 2-16:1) [mitochondrial membrane]
phosphatidate (1-16:0, 2-18:1) [mitochondrial membrane]
CDP-diacylglycerol (1-16:0, 2-18:1) [mitochondrial membrane]
phosphatidate (1-16:1, 2-18:1) [mitochondrial membrane]
CDP-diacylglycerol (1-16:1, 2-18:1) [mitochondrial membrane]
phosphatidyl-L-serine (1-16:0, 2-16:1) [endoplasmic reticulum membrane]
phosphatidyl-L-serine (1-16:1, 2-16:1) [endoplasmic reticulum membrane]
phosphatidyl-L-serine (1-18:0, 2-16:1) [endoplasmic reticulum membrane]
phosphatidyl-L-serine (1-18:1, 2-16:1) [endoplasmic reticulum membrane]
phosphatidyl-L-serine (1-16:0, 2-18:1) [endoplasmic reticulum membrane]
phosphatidyl-L-serine (1-16:1, 2-18:1) [endoplasmic reticulum membrane]
phosphatidyl-L-serine (1-18:0, 2-18:1) [endoplasmic reticulum membrane]
phosphatidyl-L-serine (1-18:1, 2-18:1) [endoplasmic reticulum membrane]
1-phosphatidyl-1D-myo-inositol (1-16:0, 2-16:1) [endoplasmic reticulum membrane]
1-phosphatidyl-1D-myo-inositol (1-16:1, 2-16:1) [endoplasmic reticulum membrane]
1-phosphatidyl-1D-myo-inositol (1-18:0, 2-16:1) [endoplasmic reticulum membrane]
1-phosphatidyl-1D-myo-inositol (1-18:1, 2-16:1) [endoplasmic reticulum membrane]
1-phosphatidyl-1D-myo-inositol (1-16:0, 2-18:1) [endoplasmic reticulum membrane]
1-phosphatidyl-1D-myo-inositol (1-16:1, 2-18:1) [endoplasmic reticulum membrane]
1-phosphatidyl-1D-myo-inositol (1-18:0, 2-18:1) [endoplasmic reticulum membrane]
1-phosphatidyl-1D-myo-inositol (1-18:1, 2-18:1) [endoplasmic reticulum membrane]
sn-2-acyl-1-lysophosphatidylinositol (16:1) [endoplasmic reticulum membrane]
sn-2-acyl-1-lysophosphatidylinositol (18:1) [endoplasmic reticulum membrane]
phosphatidyl-L-serine (1-16:0, 2-16:1) [mitochondrial membrane]
carbon dioxide [mitochondrial membrane]
phosphatidylethanolamine (1-16:0, 2-16:1) [mitochondrial membrane]
phosphatidyl-L-serine (1-16:1, 2-16:1) [mitochondrial membrane]
phosphatidylethanolamine (1-16:1, 2-16:1) [mitochondrial membrane]
phosphatidyl-L-serine (1-18:0, 2-16:1) [mitochondrial membrane]
phosphatidylethanolamine (1-18:0, 2-16:1) [mitochondrial membrane]
phosphatidyl-L-serine (1-18:1, 2-16:1) [mitochondrial membrane]
phosphatidylethanolamine (1-18:1, 2-16:1) [mitochondrial membrane]
phosphatidyl-L-serine (1-16:0, 2-18:1) [mitochondrial membrane]
phosphatidylethanolamine (1-16:0, 2-18:1) [mitochondrial membrane]
phosphatidyl-L-serine (1-16:1, 2-18:1) [mitochondrial membrane]
phosphatidylethanolamine (1-16:1, 2-18:1) [mitochondrial membrane]
phosphatidyl-L-serine (1-18:0, 2-18:1) [mitochondrial membrane]
phosphatidylethanolamine (1-18:0, 2-18:1) [mitochondrial membrane]
phosphatidyl-L-serine (1-18:1, 2-18:1) [mitochondrial membrane]
phosphatidylethanolamine (1-18:1, 2-18:1) [mitochondrial membrane]
phosphatidyl-L-serine (1-16:0, 2-16:1) [Golgi membrane]
H+ [Golgi membrane]
carbon dioxide [Golgi membrane]
phosphatidylethanolamine (1-16:0, 2-16:1) [Golgi membrane]
phosphatidyl-L-serine (1-16:1, 2-16:1) [Golgi membrane]
phosphatidylethanolamine (1-16:1, 2-16:1) [Golgi membrane]
phosphatidyl-L-serine (1-18:0, 2-16:1) [Golgi membrane]
phosphatidylethanolamine (1-18:0, 2-16:1) [Golgi membrane]
phosphatidyl-L-serine (1-18:1, 2-16:1) [Golgi membrane]
phosphatidylethanolamine (1-18:1, 2-16:1) [Golgi membrane]
phosphatidyl-L-serine (1-16:0, 2-18:1) [Golgi membrane]
phosphatidylethanolamine (1-16:0, 2-18:1) [Golgi membrane]
phosphatidyl-L-serine (1-16:1, 2-18:1) [Golgi membrane]
phosphatidylethanolamine (1-16:1, 2-18:1) [Golgi membrane]
phosphatidyl-L-serine (1-18:0, 2-18:1) [Golgi membrane]
phosphatidylethanolamine (1-18:0, 2-18:1) [Golgi membrane]
phosphatidyl-L-serine (1-18:1, 2-18:1) [Golgi membrane]
phosphatidylethanolamine (1-18:1, 2-18:1) [Golgi membrane]
phosphatidyl-L-serine (1-16:0, 2-16:1) [vacuolar membrane]
H+ [vacuolar membrane]
carbon dioxide [vacuolar membrane]
phosphatidylethanolamine (1-16:0, 2-16:1) [vacuolar membrane]
phosphatidyl-L-serine (1-16:1, 2-16:1) [vacuolar membrane]
phosphatidylethanolamine (1-16:1, 2-16:1) [vacuolar membrane]
phosphatidyl-L-serine (1-18:0, 2-16:1) [vacuolar membrane]
phosphatidylethanolamine (1-18:0, 2-16:1) [vacuolar membrane]
phosphatidyl-L-serine (1-18:1, 2-16:1) [vacuolar membrane]
phosphatidylethanolamine (1-18:1, 2-16:1) [vacuolar membrane]
phosphatidyl-L-serine (1-16:0, 2-18:1) [vacuolar membrane]
phosphatidylethanolamine (1-16:0, 2-18:1) [vacuolar membrane]
phosphatidyl-L-serine (1-16:1, 2-18:1) [vacuolar membrane]
phosphatidylethanolamine (1-16:1, 2-18:1) [vacuolar membrane]
phosphatidyl-L-serine (1-18:0, 2-18:1) [vacuolar membrane]
phosphatidylethanolamine (1-18:0, 2-18:1) [vacuolar membrane]
phosphatidyl-L-serine (1-18:1, 2-18:1) [vacuolar membrane]
phosphatidylethanolamine (1-18:1, 2-18:1) [vacuolar membrane]
phosphatidylethanolamine (1-16:0, 2-16:1) [endoplasmic reticulum membrane]
phosphatidyl-N-methylethanolamine (1-16:0, 2-16:1) [endoplasmic reticulum membrane]
phosphatidylethanolamine (1-16:1, 2-16:1) [endoplasmic reticulum membrane]
phosphatidyl-N-methylethanolamine (1-16:1, 2-16:1) [endoplasmic reticulum membrane]
phosphatidylethanolamine (1-18:0, 2-16:1) [endoplasmic reticulum membrane]
phosphatidyl-N-methylethanolamine (1-18:0, 2-16:1) [endoplasmic reticulum membrane]
phosphatidylethanolamine (1-18:1, 2-16:1) [endoplasmic reticulum membrane]
phosphatidyl-N-methylethanolamine (1-18:1, 2-16:1) [endoplasmic reticulum membrane]
phosphatidylethanolamine (1-16:0, 2-18:1) [endoplasmic reticulum membrane]
phosphatidyl-N-methylethanolamine (1-16:0, 2-18:1) [endoplasmic reticulum membrane]
phosphatidylethanolamine (1-16:1, 2-18:1) [endoplasmic reticulum membrane]
phosphatidyl-N-methylethanolamine (1-16:1, 2-18:1) [endoplasmic reticulum membrane]
phosphatidylethanolamine (1-18:0, 2-18:1) [endoplasmic reticulum membrane]
phosphatidyl-N-methylethanolamine (1-18:0, 2-18:1) [endoplasmic reticulum membrane]
phosphatidylethanolamine (1-18:1, 2-18:1) [endoplasmic reticulum membrane]
phosphatidyl-N-methylethanolamine (1-18:1, 2-18:1) [endoplasmic reticulum membrane]
phosphatidyl-N,N-dimethylethanolamine (1-16:0, 2-16:1) [endoplasmic reticulum membrane]
phosphatidyl-N,N-dimethylethanolamine (1-16:1, 2-16:1) [endoplasmic reticulum membrane]
phosphatidyl-N,N-dimethylethanolamine (1-18:0, 2-16:1) [endoplasmic reticulum membrane]
phosphatidyl-N,N-dimethylethanolamine (1-18:1, 2-16:1) [endoplasmic reticulum membrane]
phosphatidyl-N,N-dimethylethanolamine (1-16:0, 2-18:1) [endoplasmic reticulum membrane]
phosphatidyl-N,N-dimethylethanolamine (1-16:1, 2-18:1) [endoplasmic reticulum membrane]
phosphatidyl-N,N-dimethylethanolamine (1-18:0, 2-18:1) [endoplasmic reticulum membrane]
phosphatidyl-N,N-dimethylethanolamine (1-18:1, 2-18:1) [endoplasmic reticulum membrane]
phosphatidylcholine (1-16:0, 2-16:1) [endoplasmic reticulum membrane]
phosphatidylcholine (1-16:1, 2-16:1) [endoplasmic reticulum membrane]
phosphatidylcholine (1-18:0, 2-16:1) [endoplasmic reticulum membrane]
phosphatidylcholine (1-18:1, 2-16:1) [endoplasmic reticulum membrane]
phosphatidylcholine (1-16:0, 2-18:1) [endoplasmic reticulum membrane]
phosphatidylcholine (1-16:1, 2-18:1) [endoplasmic reticulum membrane]
phosphatidylcholine (1-18:0, 2-18:1) [endoplasmic reticulum membrane]
phosphatidylcholine (1-18:1, 2-18:1) [endoplasmic reticulum membrane]
CDP [endoplasmic reticulum membrane]
CDP-ethanolamine [endoplasmic reticulum membrane]
CDP-choline [endoplasmic reticulum membrane]
glycerol 3-phosphate [mitochondrial membrane]
CMP [mitochondrial membrane]
3-(3-sn-phosphatidyl)-sn-glycerol 1-phosphate (1-16:0, 2-16:1) [mitochondrial membrane]
3-(3-sn-phosphatidyl)-sn-glycerol 1-phosphate (1-16:1, 2-16:1) [mitochondrial membrane]
3-(3-sn-phosphatidyl)-sn-glycerol 1-phosphate (1-18:0, 2-16:1) [mitochondrial membrane]
3-(3-sn-phosphatidyl)-sn-glycerol 1-phosphate (1-18:1, 2-16:1) [mitochondrial membrane]
3-(3-sn-phosphatidyl)-sn-glycerol 1-phosphate (1-16:0, 2-18:1) [mitochondrial membrane]
3-(3-sn-phosphatidyl)-sn-glycerol 1-phosphate (1-16:1, 2-18:1) [mitochondrial membrane]
H2O [mitochondrial membrane]
phosphatidylglycerol (1-16:0, 2-16:1) [mitochondrial membrane]
phosphate [mitochondrial membrane]
phosphatidylglycerol (1-16:1, 2-16:1) [mitochondrial membrane]
phosphatidylglycerol (1-18:0, 2-16:1) [mitochondrial membrane]
phosphatidylglycerol (1-18:1, 2-16:1) [mitochondrial membrane]
phosphatidylglycerol (1-16:0, 2-18:1) [mitochondrial membrane]
phosphatidylglycerol (1-16:1, 2-18:1) [mitochondrial membrane]
cardiolipin (1-16:0, 2-16:1, 3-16:0, 4-16:1) [mitochondrial membrane]
cardiolipin (1-16:0, 2-16:1, 3-16:1, 4-16:1) [mitochondrial membrane]
cardiolipin (1-16:0, 2-16:1, 3-18:0, 4-16:1) [mitochondrial membrane]
cardiolipin (1-16:0, 2-16:1, 3-18:1, 4-16:1) [mitochondrial membrane]
cardiolipin (1-16:0, 2-16:1, 3-16:0, 4-18:1) [mitochondrial membrane]
cardiolipin (1-16:0, 2-16:1, 3-16:1, 4-18:1) [mitochondrial membrane]
cardiolipin (1-16:1, 2-16:1, 3-16:0, 4-16:1) [mitochondrial membrane]
cardiolipin (1-16:1, 2-16:1, 3-16:1, 4-16:1) [mitochondrial membrane]
cardiolipin (1-16:1, 2-16:1, 3-18:0, 4-16:1) [mitochondrial membrane]
cardiolipin (1-16:1, 2-16:1, 3-18:1, 4-16:1) [mitochondrial membrane]
cardiolipin (1-16:1, 2-16:1, 3-16:0, 4-18:1) [mitochondrial membrane]
cardiolipin (1-16:1, 2-16:1, 3-16:1, 4-18:1) [mitochondrial membrane]
cardiolipin (1-18:0, 2-16:1, 3-16:0, 4-16:1) [mitochondrial membrane]
cardiolipin (1-18:0, 2-16:1, 3-16:1, 4-16:1) [mitochondrial membrane]
cardiolipin (1-18:0, 2-16:1, 3-18:0, 4-16:1) [mitochondrial membrane]
cardiolipin (1-18:0, 2-16:1, 3-18:1, 4-16:1) [mitochondrial membrane]
cardiolipin (1-18:0, 2-16:1, 3-16:0, 4-18:1) [mitochondrial membrane]
cardiolipin (1-18:0, 2-16:1, 3-16:1, 4-18:1) [mitochondrial membrane]
cardiolipin (1-18:1, 2-16:1, 3-16:0, 4-16:1) [mitochondrial membrane]
cardiolipin (1-18:1, 2-16:1, 3-16:1, 4-16:1) [mitochondrial membrane]
cardiolipin (1-18:1, 2-16:1, 3-18:0, 4-16:1) [mitochondrial membrane]
cardiolipin (1-18:1, 2-16:1, 3-18:1, 4-16:1) [mitochondrial membrane]
cardiolipin (1-18:1, 2-16:1, 3-16:0, 4-18:1) [mitochondrial membrane]
cardiolipin (1-18:1, 2-16:1, 3-16:1, 4-18:1) [mitochondrial membrane]
cardiolipin (1-16:0, 2-18:1, 3-16:0, 4-16:1) [mitochondrial membrane]
cardiolipin (1-16:0, 2-18:1, 3-16:1, 4-16:1) [mitochondrial membrane]
cardiolipin (1-16:0, 2-18:1, 3-18:0, 4-16:1) [mitochondrial membrane]
cardiolipin (1-16:0, 2-18:1, 3-18:1, 4-16:1) [mitochondrial membrane]
cardiolipin (1-16:0, 2-18:1, 3-16:0, 4-18:1) [mitochondrial membrane]
cardiolipin (1-16:0, 2-18:1, 3-16:1, 4-18:1) [mitochondrial membrane]
cardiolipin (1-16:1, 2-18:1, 3-16:0, 4-16:1) [mitochondrial membrane]
cardiolipin (1-16:1, 2-18:1, 3-16:1, 4-16:1) [mitochondrial membrane]
cardiolipin (1-16:1, 2-18:1, 3-18:0, 4-16:1) [mitochondrial membrane]
cardiolipin (1-16:1, 2-18:1, 3-18:1, 4-16:1) [mitochondrial membrane]
cardiolipin (1-16:1, 2-18:1, 3-16:0, 4-18:1) [mitochondrial membrane]
cardiolipin (1-16:1, 2-18:1, 3-16:1, 4-18:1) [mitochondrial membrane]
monolysocardiolipin (2-16:1, 3-16:0, 4-16:1) [mitochondrial membrane]
palmitate [mitochondrial membrane]
monolysocardiolipin (2-16:1, 3-16:1, 4-16:1) [mitochondrial membrane]
monolysocardiolipin (2-16:1, 3-18:0, 4-16:1) [mitochondrial membrane]
monolysocardiolipin (2-16:1, 3-18:1, 4-16:1) [mitochondrial membrane]
monolysocardiolipin (2-16:1, 3-16:0, 4-18:1) [mitochondrial membrane]
monolysocardiolipin (2-16:1, 3-16:1, 4-18:1) [mitochondrial membrane]
stearate [mitochondrial membrane]
monolysocardiolipin (2-18:1, 3-16:0, 4-16:1) [mitochondrial membrane]
monolysocardiolipin (2-18:1, 3-16:1, 4-16:1) [mitochondrial membrane]
monolysocardiolipin (2-18:1, 3-18:0, 4-16:1) [mitochondrial membrane]
monolysocardiolipin (2-18:1, 3-18:1, 4-16:1) [mitochondrial membrane]
monolysocardiolipin (2-18:1, 3-16:0, 4-18:1) [mitochondrial membrane]
monolysocardiolipin (2-18:1, 3-16:1, 4-18:1) [mitochondrial membrane]
monolysocardiolipin (1-16:0, 2-16:1, 4-16:1) [mitochondrial membrane]
monolysocardiolipin (1-16:0, 2-16:1, 4-18:1) [mitochondrial membrane]
monolysocardiolipin (1-16:1, 2-16:1, 4-16:1) [mitochondrial membrane]
monolysocardiolipin (1-16:1, 2-16:1, 4-18:1) [mitochondrial membrane]
monolysocardiolipin (1-18:0, 2-16:1, 4-16:1) [mitochondrial membrane]
monolysocardiolipin (1-18:0, 2-16:1, 4-18:1) [mitochondrial membrane]
monolysocardiolipin (1-18:1, 2-16:1, 4-16:1) [mitochondrial membrane]
monolysocardiolipin (1-18:1, 2-16:1, 4-18:1) [mitochondrial membrane]
monolysocardiolipin (1-16:0, 2-18:1, 4-16:1) [mitochondrial membrane]
monolysocardiolipin (1-16:0, 2-18:1, 4-18:1) [mitochondrial membrane]
monolysocardiolipin (1-16:1, 2-18:1, 4-16:1) [mitochondrial membrane]
monolysocardiolipin (1-16:1, 2-18:1, 4-18:1) [mitochondrial membrane]
phosphatidylcholine (1-16:0, 2-16:1) [mitochondrial membrane]
1-acylglycerophosphocholine (16:0) [mitochondrial membrane]
phosphatidylcholine (1-16:1, 2-16:1) [mitochondrial membrane]
1-acylglycerophosphocholine (16:1) [mitochondrial membrane]
phosphatidylcholine (1-18:0, 2-16:1) [mitochondrial membrane]
1-acylglycerophosphocholine (18:0) [mitochondrial membrane]
phosphatidylcholine (1-18:1, 2-16:1) [mitochondrial membrane]
1-acylglycerophosphocholine (18:1) [mitochondrial membrane]
phosphatidylcholine (1-16:0, 2-18:1) [mitochondrial membrane]
phosphatidylcholine (1-16:1, 2-18:1) [mitochondrial membrane]
phosphatidylcholine (1-18:0, 2-18:1) [mitochondrial membrane]
phosphatidylcholine (1-18:1, 2-18:1) [mitochondrial membrane]
cardiolipin (1-18:1, 2-18:1, 3-16:0, 4-16:1) [mitochondrial membrane]
cardiolipin (1-18:1, 2-18:1, 3-16:1, 4-16:1) [mitochondrial membrane]
cardiolipin (1-18:1, 2-18:1, 3-18:0, 4-16:1) [mitochondrial membrane]
cardiolipin (1-18:1, 2-18:1, 3-18:1, 4-16:1) [mitochondrial membrane]
cardiolipin (1-18:1, 2-18:1, 3-16:0, 4-18:1) [mitochondrial membrane]
cardiolipin (1-18:1, 2-18:1, 3-16:1, 4-18:1) [mitochondrial membrane]
cardiolipin (1-16:0, 2-16:1, 3-18:1, 4-18:1) [mitochondrial membrane]
cardiolipin (1-16:1, 2-16:1, 3-18:1, 4-18:1) [mitochondrial membrane]
cardiolipin (1-18:0, 2-16:1, 3-18:1, 4-18:1) [mitochondrial membrane]
cardiolipin (1-18:1, 2-16:1, 3-18:1, 4-18:1) [mitochondrial membrane]
cardiolipin (1-16:0, 2-18:1, 3-18:1, 4-18:1) [mitochondrial membrane]
cardiolipin (1-16:1, 2-18:1, 3-18:1, 4-18:1) [mitochondrial membrane]
palmitoleoyl-CoA [mitochondrial membrane]
coenzyme A [mitochondrial membrane]
oleoyl-CoA [mitochondrial membrane]
1-phosphatidyl-1D-myo-inositol (1-16:0, 2-16:1) [cell envelope]
ADP [cell envelope]
1-phosphatidyl-1D-myo-inositol 4-phosphate (1-16:0, 2-16:1) [cell envelope]
1-phosphatidyl-1D-myo-inositol (1-16:1, 2-16:1) [cell envelope]
1-phosphatidyl-1D-myo-inositol 4-phosphate (1-16:1, 2-16:1) [cell envelope]
1-phosphatidyl-1D-myo-inositol (1-18:0, 2-16:1) [cell envelope]
1-phosphatidyl-1D-myo-inositol 4-phosphate (1-18:0, 2-16:1) [cell envelope]
1-phosphatidyl-1D-myo-inositol (1-18:1, 2-16:1) [cell envelope]
1-phosphatidyl-1D-myo-inositol 4-phosphate (1-18:1, 2-16:1) [cell envelope]
1-phosphatidyl-1D-myo-inositol (1-16:0, 2-18:1) [cell envelope]
1-phosphatidyl-1D-myo-inositol 4-phosphate (1-16:0, 2-18:1) [cell envelope]
1-phosphatidyl-1D-myo-inositol (1-16:1, 2-18:1) [cell envelope]
1-phosphatidyl-1D-myo-inositol 4-phosphate (1-16:1, 2-18:1) [cell envelope]
1-phosphatidyl-1D-myo-inositol (1-18:0, 2-18:1) [cell envelope]
1-phosphatidyl-1D-myo-inositol 4-phosphate (1-18:0, 2-18:1) [cell envelope]
1-phosphatidyl-1D-myo-inositol (1-18:1, 2-18:1) [cell envelope]
1-phosphatidyl-1D-myo-inositol 4-phosphate (1-18:1, 2-18:1) [cell envelope]
1-phosphatidyl-1D-myo-inositol (1-16:0, 2-16:1) [vacuolar membrane]
ATP [vacuolar membrane]
ADP [vacuolar membrane]
1-phosphatidyl-1D-myo-inositol 4-phosphate (1-16:0, 2-16:1) [vacuolar membrane]
1-phosphatidyl-1D-myo-inositol (1-16:1, 2-16:1) [vacuolar membrane]
1-phosphatidyl-1D-myo-inositol 4-phosphate (1-16:1, 2-16:1) [vacuolar membrane]
1-phosphatidyl-1D-myo-inositol (1-18:0, 2-16:1) [vacuolar membrane]
1-phosphatidyl-1D-myo-inositol 4-phosphate (1-18:0, 2-16:1) [vacuolar membrane]
1-phosphatidyl-1D-myo-inositol (1-18:1, 2-16:1) [vacuolar membrane]
1-phosphatidyl-1D-myo-inositol 4-phosphate (1-18:1, 2-16:1) [vacuolar membrane]
1-phosphatidyl-1D-myo-inositol (1-16:0, 2-18:1) [vacuolar membrane]
1-phosphatidyl-1D-myo-inositol 4-phosphate (1-16:0, 2-18:1) [vacuolar membrane]
1-phosphatidyl-1D-myo-inositol (1-16:1, 2-18:1) [vacuolar membrane]
1-phosphatidyl-1D-myo-inositol 4-phosphate (1-16:1, 2-18:1) [vacuolar membrane]
1-phosphatidyl-1D-myo-inositol (1-18:0, 2-18:1) [vacuolar membrane]
1-phosphatidyl-1D-myo-inositol 4-phosphate (1-18:0, 2-18:1) [vacuolar membrane]
1-phosphatidyl-1D-myo-inositol (1-18:1, 2-18:1) [vacuolar membrane]
1-phosphatidyl-1D-myo-inositol 4-phosphate (1-18:1, 2-18:1) [vacuolar membrane]
1-phosphatidyl-1D-myo-inositol (1-16:0, 2-16:1) [Golgi membrane]
ATP [Golgi membrane]
ADP [Golgi membrane]
1-phosphatidyl-1D-myo-inositol 4-phosphate (1-16:0, 2-16:1) [Golgi membrane]
1-phosphatidyl-1D-myo-inositol (1-16:1, 2-16:1) [Golgi membrane]
1-phosphatidyl-1D-myo-inositol 4-phosphate (1-16:1, 2-16:1) [Golgi membrane]
1-phosphatidyl-1D-myo-inositol (1-18:0, 2-16:1) [Golgi membrane]
1-phosphatidyl-1D-myo-inositol 4-phosphate (1-18:0, 2-16:1) [Golgi membrane]
1-phosphatidyl-1D-myo-inositol (1-18:1, 2-16:1) [Golgi membrane]
1-phosphatidyl-1D-myo-inositol 4-phosphate (1-18:1, 2-16:1) [Golgi membrane]
1-phosphatidyl-1D-myo-inositol (1-16:0, 2-18:1) [Golgi membrane]
1-phosphatidyl-1D-myo-inositol 4-phosphate (1-16:0, 2-18:1) [Golgi membrane]
1-phosphatidyl-1D-myo-inositol (1-16:1, 2-18:1) [Golgi membrane]
1-phosphatidyl-1D-myo-inositol 4-phosphate (1-16:1, 2-18:1) [Golgi membrane]
1-phosphatidyl-1D-myo-inositol (1-18:0, 2-18:1) [Golgi membrane]
1-phosphatidyl-1D-myo-inositol 4-phosphate (1-18:0, 2-18:1) [Golgi membrane]
1-phosphatidyl-1D-myo-inositol (1-18:1, 2-18:1) [Golgi membrane]
1-phosphatidyl-1D-myo-inositol 4-phosphate (1-18:1, 2-18:1) [Golgi membrane]
1-phosphatidyl-1D-myo-inositol (1-16:0, 2-16:1) [nucleus]
1-phosphatidyl-1D-myo-inositol 4-phosphate (1-16:0, 2-16:1) [nucleus]
1-phosphatidyl-1D-myo-inositol (1-16:1, 2-16:1) [nucleus]
1-phosphatidyl-1D-myo-inositol 4-phosphate (1-16:1, 2-16:1) [nucleus]
1-phosphatidyl-1D-myo-inositol (1-18:0, 2-16:1) [nucleus]
1-phosphatidyl-1D-myo-inositol 4-phosphate (1-18:0, 2-16:1) [nucleus]
1-phosphatidyl-1D-myo-inositol (1-18:1, 2-16:1) [nucleus]
1-phosphatidyl-1D-myo-inositol 4-phosphate (1-18:1, 2-16:1) [nucleus]
1-phosphatidyl-1D-myo-inositol (1-16:0, 2-18:1) [nucleus]
1-phosphatidyl-1D-myo-inositol 4-phosphate (1-16:0, 2-18:1) [nucleus]
1-phosphatidyl-1D-myo-inositol (1-16:1, 2-18:1) [nucleus]
1-phosphatidyl-1D-myo-inositol 4-phosphate (1-16:1, 2-18:1) [nucleus]
1-phosphatidyl-1D-myo-inositol (1-18:0, 2-18:1) [nucleus]
1-phosphatidyl-1D-myo-inositol 4-phosphate (1-18:0, 2-18:1) [nucleus]
1-phosphatidyl-1D-myo-inositol (1-18:1, 2-18:1) [nucleus]
1-phosphatidyl-1D-myo-inositol 4-phosphate (1-18:1, 2-18:1) [nucleus]
1-phosphatidyl-1D-myo-inositol 3-phosphate (1-16:0, 2-16:1) [vacuolar membrane]
1-phosphatidyl-1D-myo-inositol 3-phosphate (1-16:1, 2-16:1) [vacuolar membrane]
1-phosphatidyl-1D-myo-inositol 3-phosphate (1-18:0, 2-16:1) [vacuolar membrane]
1-phosphatidyl-1D-myo-inositol 3-phosphate (1-18:1, 2-16:1) [vacuolar membrane]
1-phosphatidyl-1D-myo-inositol 3-phosphate (1-16:0, 2-18:1) [vacuolar membrane]
1-phosphatidyl-1D-myo-inositol 3-phosphate (1-16:1, 2-18:1) [vacuolar membrane]
1-phosphatidyl-1D-myo-inositol 3-phosphate (1-18:0, 2-18:1) [vacuolar membrane]
1-phosphatidyl-1D-myo-inositol 3-phosphate (1-18:1, 2-18:1) [vacuolar membrane]
1-phosphatidyl-1D-myo-inositol 4,5-bisphosphate (1-16:0, 2-16:1) [nucleus]
1-phosphatidyl-1D-myo-inositol 4,5-bisphosphate (1-16:1, 2-16:1) [nucleus]
1-phosphatidyl-1D-myo-inositol 4,5-bisphosphate (1-18:0, 2-16:1) [nucleus]
1-phosphatidyl-1D-myo-inositol 4,5-bisphosphate (1-18:1, 2-16:1) [nucleus]
1-phosphatidyl-1D-myo-inositol 4,5-bisphosphate (1-16:0, 2-18:1) [nucleus]
1-phosphatidyl-1D-myo-inositol 4,5-bisphosphate (1-16:1, 2-18:1) [nucleus]
1-phosphatidyl-1D-myo-inositol 4,5-bisphosphate (1-18:0, 2-18:1) [nucleus]
1-phosphatidyl-1D-myo-inositol 4,5-bisphosphate (1-18:1, 2-18:1) [nucleus]
1-phosphatidyl-1D-myo-inositol 4,5-bisphosphate (1-16:0, 2-16:1) [cell envelope]
1-phosphatidyl-1D-myo-inositol 4,5-bisphosphate (1-16:1, 2-16:1) [cell envelope]
1-phosphatidyl-1D-myo-inositol 4,5-bisphosphate (1-18:0, 2-16:1) [cell envelope]
1-phosphatidyl-1D-myo-inositol 4,5-bisphosphate (1-18:1, 2-16:1) [cell envelope]
1-phosphatidyl-1D-myo-inositol 4,5-bisphosphate (1-16:0, 2-18:1) [cell envelope]
1-phosphatidyl-1D-myo-inositol 4,5-bisphosphate (1-16:1, 2-18:1) [cell envelope]
1-phosphatidyl-1D-myo-inositol 4,5-bisphosphate (1-18:0, 2-18:1) [cell envelope]
1-phosphatidyl-1D-myo-inositol 4,5-bisphosphate (1-18:1, 2-18:1) [cell envelope]
1-phosphatidyl-1D-myo-inositol 3,5-bisphosphate (1-16:0, 2-16:1) [vacuolar membrane]
1-phosphatidyl-1D-myo-inositol 3,5-bisphosphate (1-16:1, 2-16:1) [vacuolar membrane]
1-phosphatidyl-1D-myo-inositol 3,5-bisphosphate (1-18:0, 2-16:1) [vacuolar membrane]
1-phosphatidyl-1D-myo-inositol 3,5-bisphosphate (1-18:1, 2-16:1) [vacuolar membrane]
1-phosphatidyl-1D-myo-inositol 3,5-bisphosphate (1-16:0, 2-18:1) [vacuolar membrane]
1-phosphatidyl-1D-myo-inositol 3,5-bisphosphate (1-16:1, 2-18:1) [vacuolar membrane]
1-phosphatidyl-1D-myo-inositol 3,5-bisphosphate (1-18:0, 2-18:1) [vacuolar membrane]
1-phosphatidyl-1D-myo-inositol 3,5-bisphosphate (1-18:1, 2-18:1) [vacuolar membrane]
1-acylglycerophosphoethanolamine (16:0) [endoplasmic reticulum membrane]
1-acylglycerophosphoethanolamine (16:1) [endoplasmic reticulum membrane]
1-acylglycerophosphoethanolamine (18:0) [endoplasmic reticulum membrane]
1-acylglycerophosphoethanolamine (18:1) [endoplasmic reticulum membrane]
1-acylglycerophosphocholine (16:0) [endoplasmic reticulum membrane]
1-acylglycerophosphocholine (16:1) [endoplasmic reticulum membrane]
1-acylglycerophosphocholine (18:0) [endoplasmic reticulum membrane]
1-acylglycerophosphocholine (18:1) [endoplasmic reticulum membrane]
episterol [endoplasmic reticulum membrane]
episteryl oleate [endoplasmic reticulum membrane]
episteryl palmitoleate [endoplasmic reticulum membrane]
fecosterol [endoplasmic reticulum membrane]
fecosteryl oleate [endoplasmic reticulum membrane]
fecosteryl palmitoleate [endoplasmic reticulum membrane]
lanosterol [endoplasmic reticulum membrane]
lanosteryl oleate [endoplasmic reticulum membrane]
lanosteryl palmitoleate [endoplasmic reticulum membrane]
zymosterol [endoplasmic reticulum membrane]
zymosteryl oleate [endoplasmic reticulum membrane]
zymosteryl palmitoleate [endoplasmic reticulum membrane]
sn-glycero-3-phosphocholine [endoplasmic reticulum membrane]
phosphatidylcholine (1-16:0, 2-16:1) [cell envelope]
H2O [cell envelope]
1-acylglycerophosphocholine (16:0) [cell envelope]
palmitoleate [cell envelope]
phosphatidylcholine (1-16:1, 2-16:1) [cell envelope]
1-acylglycerophosphocholine (16:1) [cell envelope]
phosphatidylcholine (1-18:0, 2-16:1) [cell envelope]
1-acylglycerophosphocholine (18:0) [cell envelope]
phosphatidylcholine (1-18:1, 2-16:1) [cell envelope]
1-acylglycerophosphocholine (18:1) [cell envelope]
phosphatidylcholine (1-16:0, 2-18:1) [cell envelope]
oleate [cell envelope]
phosphatidylcholine (1-16:1, 2-18:1) [cell envelope]
phosphatidylcholine (1-18:0, 2-18:1) [cell envelope]
phosphatidylcholine (1-18:1, 2-18:1) [cell envelope]
palmitate [cell envelope]
stearate [cell envelope]
phosphatidylethanolamine (1-16:0, 2-16:1) [cell envelope]
1-acylglycerophosphoethanolamine (16:0) [cell envelope]
phosphatidylethanolamine (1-16:1, 2-16:1) [cell envelope]
1-acylglycerophosphoethanolamine (16:1) [cell envelope]
phosphatidylethanolamine (1-18:0, 2-16:1) [cell envelope]
1-acylglycerophosphoethanolamine (18:0) [cell envelope]
phosphatidylethanolamine (1-18:1, 2-16:1) [cell envelope]
1-acylglycerophosphoethanolamine (18:1) [cell envelope]
phosphatidylethanolamine (1-16:0, 2-18:1) [cell envelope]
phosphatidylethanolamine (1-16:1, 2-18:1) [cell envelope]
phosphatidylethanolamine (1-18:0, 2-18:1) [cell envelope]
phosphatidylethanolamine (1-18:1, 2-18:1) [cell envelope]
sn-glycero-3-phosphoethanolamine [cell envelope]
phosphatidyl-L-serine (1-16:0, 2-16:1) [cell envelope]
1-acylglycerophosphoserine (16:0) [cell envelope]
phosphatidyl-L-serine (1-16:1, 2-16:1) [cell envelope]
1-acylglycerophosphoserine (16:1) [cell envelope]
phosphatidyl-L-serine (1-18:0, 2-16:1) [cell envelope]
1-acylglycerophosphoserine (18:0) [cell envelope]
phosphatidyl-L-serine (1-18:1, 2-16:1) [cell envelope]
1-acylglycerophosphoserine (18:1) [cell envelope]
phosphatidyl-L-serine (1-16:0, 2-18:1) [cell envelope]
phosphatidyl-L-serine (1-16:1, 2-18:1) [cell envelope]
phosphatidyl-L-serine (1-18:0, 2-18:1) [cell envelope]
phosphatidyl-L-serine (1-18:1, 2-18:1) [cell envelope]
sn-glycero-3-phosphoserine [cell envelope]
1-acylglycerophosphoinositol (16:0) [cell envelope]
1-acylglycerophosphoinositol (16:1) [cell envelope]
1-acylglycerophosphoinositol (18:0) [cell envelope]
1-acylglycerophosphoinositol (18:1) [cell envelope]
1-(sn-glycero-3-phospho)-1D-myo-inositol [cell envelope]
1-phosphatidyl-1D-myo-inositol 4,5-bisphosphate (1-16:0, 2-16:1) [cytoplasm]
diglyceride (1-16:0, 2-16:1) [cytoplasm]
1D-myo-inositol 1,4,5-trisphosphate [cytoplasm]
1-phosphatidyl-1D-myo-inositol 4,5-bisphosphate (1-16:1, 2-16:1) [cytoplasm]
diglyceride (1-16:1, 2-16:1) [cytoplasm]
1-phosphatidyl-1D-myo-inositol 4,5-bisphosphate (1-18:0, 2-16:1) [cytoplasm]
diglyceride (1-18:0, 2-16:1) [cytoplasm]
1-phosphatidyl-1D-myo-inositol 4,5-bisphosphate (1-18:1, 2-16:1) [cytoplasm]
diglyceride (1-18:1, 2-16:1) [cytoplasm]
1-phosphatidyl-1D-myo-inositol 4,5-bisphosphate (1-16:0, 2-18:1) [cytoplasm]
diglyceride (1-16:0, 2-18:1) [cytoplasm]
1-phosphatidyl-1D-myo-inositol 4,5-bisphosphate (1-16:1, 2-18:1) [cytoplasm]
diglyceride (1-16:1, 2-18:1) [cytoplasm]
1-phosphatidyl-1D-myo-inositol 4,5-bisphosphate (1-18:0, 2-18:1) [cytoplasm]
diglyceride (1-18:0, 2-18:1) [cytoplasm]
1-phosphatidyl-1D-myo-inositol 4,5-bisphosphate (1-18:1, 2-18:1) [cytoplasm]
diglyceride (1-18:1, 2-18:1) [cytoplasm]
diglyceride (1-16:0, 2-16:1) [nucleus]
diglyceride (1-16:1, 2-16:1) [nucleus]
diglyceride (1-18:0, 2-16:1) [nucleus]
diglyceride (1-18:1, 2-16:1) [nucleus]
diglyceride (1-16:0, 2-18:1) [nucleus]
diglyceride (1-16:1, 2-18:1) [nucleus]
diglyceride (1-18:0, 2-18:1) [nucleus]
diglyceride (1-18:1, 2-18:1) [nucleus]
diglyceride (1-16:0, 2-16:1) [mitochondrial membrane]
diglyceride (1-16:1, 2-16:1) [mitochondrial membrane]
diglyceride (1-18:0, 2-16:1) [mitochondrial membrane]
diglyceride (1-18:1, 2-16:1) [mitochondrial membrane]
diglyceride (1-16:0, 2-18:1) [mitochondrial membrane]
diglyceride (1-16:1, 2-18:1) [mitochondrial membrane]
phosphatidate (1-16:0, 2-16:1) [cell envelope]
phosphatidate (1-16:1, 2-16:1) [cell envelope]
phosphatidate (1-18:0, 2-16:1) [cell envelope]
phosphatidate (1-18:1, 2-16:1) [cell envelope]
phosphatidate (1-16:0, 2-18:1) [cell envelope]
phosphatidate (1-16:1, 2-18:1) [cell envelope]
phosphatidate (1-18:0, 2-18:1) [cell envelope]
phosphatidate (1-18:1, 2-18:1) [cell envelope]
1-phosphatidyl-1D-myo-inositol 3-phosphate (1-16:0, 2-16:1) [cell envelope]
phosphate [cell envelope]
1-phosphatidyl-1D-myo-inositol 3-phosphate (1-16:1, 2-16:1) [cell envelope]
1-phosphatidyl-1D-myo-inositol 3-phosphate (1-18:0, 2-16:1) [cell envelope]
1-phosphatidyl-1D-myo-inositol 3-phosphate (1-18:1, 2-16:1) [cell envelope]
1-phosphatidyl-1D-myo-inositol 3-phosphate (1-16:0, 2-18:1) [cell envelope]
1-phosphatidyl-1D-myo-inositol 3-phosphate (1-16:1, 2-18:1) [cell envelope]
1-phosphatidyl-1D-myo-inositol 3-phosphate (1-18:0, 2-18:1) [cell envelope]
1-phosphatidyl-1D-myo-inositol 3-phosphate (1-18:1, 2-18:1) [cell envelope]
1-phosphatidyl-1D-myo-inositol 3-phosphate (1-16:0, 2-16:1) [cytoplasm]
1-phosphatidyl-1D-myo-inositol (1-16:0, 2-16:1) [cytoplasm]
1-phosphatidyl-1D-myo-inositol 3-phosphate (1-16:1, 2-16:1) [cytoplasm]
1-phosphatidyl-1D-myo-inositol (1-16:1, 2-16:1) [cytoplasm]
1-phosphatidyl-1D-myo-inositol 3-phosphate (1-18:0, 2-16:1) [cytoplasm]
1-phosphatidyl-1D-myo-inositol (1-18:0, 2-16:1) [cytoplasm]
1-phosphatidyl-1D-myo-inositol 3-phosphate (1-18:1, 2-16:1) [cytoplasm]
1-phosphatidyl-1D-myo-inositol (1-18:1, 2-16:1) [cytoplasm]
1-phosphatidyl-1D-myo-inositol 3-phosphate (1-16:0, 2-18:1) [cytoplasm]
1-phosphatidyl-1D-myo-inositol (1-16:0, 2-18:1) [cytoplasm]
1-phosphatidyl-1D-myo-inositol 3-phosphate (1-16:1, 2-18:1) [cytoplasm]
1-phosphatidyl-1D-myo-inositol (1-16:1, 2-18:1) [cytoplasm]
1-phosphatidyl-1D-myo-inositol 3-phosphate (1-18:0, 2-18:1) [cytoplasm]
1-phosphatidyl-1D-myo-inositol (1-18:0, 2-18:1) [cytoplasm]
1-phosphatidyl-1D-myo-inositol 3-phosphate (1-18:1, 2-18:1) [cytoplasm]
1-phosphatidyl-1D-myo-inositol (1-18:1, 2-18:1) [cytoplasm]
1-phosphatidyl-1D-myo-inositol 3-phosphate (1-16:0, 2-16:1) [endoplasmic reticulum membrane]
1-phosphatidyl-1D-myo-inositol 3-phosphate (1-16:1, 2-16:1) [endoplasmic reticulum membrane]
1-phosphatidyl-1D-myo-inositol 3-phosphate (1-18:0, 2-16:1) [endoplasmic reticulum membrane]
1-phosphatidyl-1D-myo-inositol 3-phosphate (1-18:1, 2-16:1) [endoplasmic reticulum membrane]
1-phosphatidyl-1D-myo-inositol 3-phosphate (1-16:0, 2-18:1) [endoplasmic reticulum membrane]
1-phosphatidyl-1D-myo-inositol 3-phosphate (1-16:1, 2-18:1) [endoplasmic reticulum membrane]
1-phosphatidyl-1D-myo-inositol 3-phosphate (1-18:0, 2-18:1) [endoplasmic reticulum membrane]
1-phosphatidyl-1D-myo-inositol 3-phosphate (1-18:1, 2-18:1) [endoplasmic reticulum membrane]
1-phosphatidyl-1D-myo-inositol 3-phosphate (1-16:0, 2-16:1) [Golgi membrane]
1-phosphatidyl-1D-myo-inositol 3-phosphate (1-16:1, 2-16:1) [Golgi membrane]
1-phosphatidyl-1D-myo-inositol 3-phosphate (1-18:0, 2-16:1) [Golgi membrane]
1-phosphatidyl-1D-myo-inositol 3-phosphate (1-18:1, 2-16:1) [Golgi membrane]
1-phosphatidyl-1D-myo-inositol 3-phosphate (1-16:0, 2-18:1) [Golgi membrane]
1-phosphatidyl-1D-myo-inositol 3-phosphate (1-16:1, 2-18:1) [Golgi membrane]
1-phosphatidyl-1D-myo-inositol 3-phosphate (1-18:0, 2-18:1) [Golgi membrane]
1-phosphatidyl-1D-myo-inositol 3-phosphate (1-18:1, 2-18:1) [Golgi membrane]
1-phosphatidyl-1D-myo-inositol 4-phosphate (1-16:0, 2-16:1) [cytoplasm]
1-phosphatidyl-1D-myo-inositol 4-phosphate (1-16:1, 2-16:1) [cytoplasm]
1-phosphatidyl-1D-myo-inositol 4-phosphate (1-18:0, 2-16:1) [cytoplasm]
1-phosphatidyl-1D-myo-inositol 4-phosphate (1-18:1, 2-16:1) [cytoplasm]
1-phosphatidyl-1D-myo-inositol 4-phosphate (1-16:0, 2-18:1) [cytoplasm]
1-phosphatidyl-1D-myo-inositol 4-phosphate (1-16:1, 2-18:1) [cytoplasm]
1-phosphatidyl-1D-myo-inositol 4-phosphate (1-18:0, 2-18:1) [cytoplasm]
1-phosphatidyl-1D-myo-inositol 4-phosphate (1-18:1, 2-18:1) [cytoplasm]
1-phosphatidyl-1D-myo-inositol 4-phosphate (1-16:0, 2-16:1) [endoplasmic reticulum membrane]
1-phosphatidyl-1D-myo-inositol 4-phosphate (1-16:1, 2-16:1) [endoplasmic reticulum membrane]
1-phosphatidyl-1D-myo-inositol 4-phosphate (1-18:0, 2-16:1) [endoplasmic reticulum membrane]
1-phosphatidyl-1D-myo-inositol 4-phosphate (1-18:1, 2-16:1) [endoplasmic reticulum membrane]
1-phosphatidyl-1D-myo-inositol 4-phosphate (1-16:0, 2-18:1) [endoplasmic reticulum membrane]
1-phosphatidyl-1D-myo-inositol 4-phosphate (1-16:1, 2-18:1) [endoplasmic reticulum membrane]
1-phosphatidyl-1D-myo-inositol 4-phosphate (1-18:0, 2-18:1) [endoplasmic reticulum membrane]
1-phosphatidyl-1D-myo-inositol 4-phosphate (1-18:1, 2-18:1) [endoplasmic reticulum membrane]
1-phosphatidyl-1D-myo-inositol 3,5-bisphosphate (1-16:0, 2-16:1) [cell envelope]
1-phosphatidyl-1D-myo-inositol 3,5-bisphosphate (1-16:1, 2-16:1) [cell envelope]
1-phosphatidyl-1D-myo-inositol 3,5-bisphosphate (1-18:0, 2-16:1) [cell envelope]
1-phosphatidyl-1D-myo-inositol 3,5-bisphosphate (1-18:1, 2-16:1) [cell envelope]
1-phosphatidyl-1D-myo-inositol 3,5-bisphosphate (1-16:0, 2-18:1) [cell envelope]
1-phosphatidyl-1D-myo-inositol 3,5-bisphosphate (1-16:1, 2-18:1) [cell envelope]
1-phosphatidyl-1D-myo-inositol 3,5-bisphosphate (1-18:0, 2-18:1) [cell envelope]
1-phosphatidyl-1D-myo-inositol 3,5-bisphosphate (1-18:1, 2-18:1) [cell envelope]
1-phosphatidyl-1D-myo-inositol 3,5-bisphosphate (1-16:0, 2-16:1) [cytoplasm]
1-phosphatidyl-1D-myo-inositol 3,5-bisphosphate (1-16:1, 2-16:1) [cytoplasm]
1-phosphatidyl-1D-myo-inositol 3,5-bisphosphate (1-18:0, 2-16:1) [cytoplasm]
1-phosphatidyl-1D-myo-inositol 3,5-bisphosphate (1-18:1, 2-16:1) [cytoplasm]
1-phosphatidyl-1D-myo-inositol 3,5-bisphosphate (1-16:0, 2-18:1) [cytoplasm]
1-phosphatidyl-1D-myo-inositol 3,5-bisphosphate (1-16:1, 2-18:1) [cytoplasm]
1-phosphatidyl-1D-myo-inositol 3,5-bisphosphate (1-18:0, 2-18:1) [cytoplasm]
1-phosphatidyl-1D-myo-inositol 3,5-bisphosphate (1-18:1, 2-18:1) [cytoplasm]
1-phosphatidyl-1D-myo-inositol 4,5-bisphosphate (1-16:0, 2-16:1) [endoplasmic reticulum membrane]
1-phosphatidyl-1D-myo-inositol 4,5-bisphosphate (1-16:1, 2-16:1) [endoplasmic reticulum membrane]
1-phosphatidyl-1D-myo-inositol 4,5-bisphosphate (1-18:0, 2-16:1) [endoplasmic reticulum membrane]
1-phosphatidyl-1D-myo-inositol 4,5-bisphosphate (1-18:1, 2-16:1) [endoplasmic reticulum membrane]
1-phosphatidyl-1D-myo-inositol 4,5-bisphosphate (1-16:0, 2-18:1) [endoplasmic reticulum membrane]
1-phosphatidyl-1D-myo-inositol 4,5-bisphosphate (1-16:1, 2-18:1) [endoplasmic reticulum membrane]
1-phosphatidyl-1D-myo-inositol 4,5-bisphosphate (1-18:0, 2-18:1) [endoplasmic reticulum membrane]
1-phosphatidyl-1D-myo-inositol 4,5-bisphosphate (1-18:1, 2-18:1) [endoplasmic reticulum membrane]
1,2-diacylglycerol 3-diphosphate (1-16:0, 2-16:1) [vacuolar membrane]
1,2-diacylglycerol 3-diphosphate (1-16:1, 2-16:1) [vacuolar membrane]
1,2-diacylglycerol 3-diphosphate (1-18:0, 2-16:1) [vacuolar membrane]
1,2-diacylglycerol 3-diphosphate (1-18:1, 2-16:1) [vacuolar membrane]
1,2-diacylglycerol 3-diphosphate (1-16:0, 2-18:1) [vacuolar membrane]
1,2-diacylglycerol 3-diphosphate (1-16:1, 2-18:1) [vacuolar membrane]
1,2-diacylglycerol 3-diphosphate (1-18:0, 2-18:1) [vacuolar membrane]
1,2-diacylglycerol 3-diphosphate (1-18:1, 2-18:1) [vacuolar membrane]
1,2-diacylglycerol 3-diphosphate (1-16:0, 2-16:1) [Golgi membrane]
1,2-diacylglycerol 3-diphosphate (1-16:1, 2-16:1) [Golgi membrane]
1,2-diacylglycerol 3-diphosphate (1-18:0, 2-16:1) [Golgi membrane]
1,2-diacylglycerol 3-diphosphate (1-18:1, 2-16:1) [Golgi membrane]
1,2-diacylglycerol 3-diphosphate (1-16:0, 2-18:1) [Golgi membrane]
1,2-diacylglycerol 3-diphosphate (1-16:1, 2-18:1) [Golgi membrane]
1,2-diacylglycerol 3-diphosphate (1-18:0, 2-18:1) [Golgi membrane]
1,2-diacylglycerol 3-diphosphate (1-18:1, 2-18:1) [Golgi membrane]
1-monoglyceride (16:0) [cytoplasm]
1-monoglyceride (16:1) [cytoplasm]
1-monoglyceride (18:0) [cytoplasm]
1-monoglyceride (18:1) [cytoplasm]
1-monoglyceride (16:0) [vacuolar membrane]
1-monoglyceride (16:1) [vacuolar membrane]
1-monoglyceride (18:0) [vacuolar membrane]
1-monoglyceride (18:1) [vacuolar membrane]
1-monoglyceride (16:0) [Golgi membrane]
1-monoglyceride (16:1) [Golgi membrane]
1-monoglyceride (18:0) [Golgi membrane]
1-monoglyceride (18:1) [Golgi membrane]
ergosteryl palmitoleate [lipid particle]
H2O [lipid particle]
ergosteryl oleate [lipid particle]
episteryl palmitoleate [lipid particle]
episterol [lipid particle]
episteryl oleate [lipid particle]
fecosteryl palmitoleate [lipid particle]
fecosteryl oleate [lipid particle]
lanosteryl palmitoleate [lipid particle]
lanosterol [lipid particle]
lanosteryl oleate [lipid particle]
zymosteryl palmitoleate [lipid particle]
zymosteryl oleate [lipid particle]
zymosteryl palmitoleate [cell envelope]
zymosteryl oleate [cell envelope]
1-monoglyceride (16:0) [lipid particle]
1-monoglyceride (16:1) [lipid particle]
1-monoglyceride (18:0) [lipid particle]
1-monoglyceride (18:1) [lipid particle]
1-monoglyceride (16:0) [mitochondrion]
oleate [mitochondrion]
1-monoglyceride (16:1) [mitochondrion]
1-monoglyceride (18:0) [mitochondrion]
1-monoglyceride (18:1) [mitochondrion]
glycerol [lipid particle]
1-acylglycerophosphoethanolamine (16:0) [lipid particle]
phosphatidylethanolamine (1-16:0, 2-18:1) [lipid particle]
1-acylglycerophosphoethanolamine (16:1) [lipid particle]
phosphatidylethanolamine (1-16:1, 2-18:1) [lipid particle]
1-acylglycerophosphoethanolamine (18:0) [lipid particle]
phosphatidylethanolamine (1-18:0, 2-18:1) [lipid particle]
1-acylglycerophosphoethanolamine (18:1) [lipid particle]
phosphatidylethanolamine (1-18:1, 2-18:1) [lipid particle]
phosphatidylcholine (1-16:0, 2-16:1) [lipid particle]
1-acylglycerophosphocholine (16:0) [lipid particle]
phosphatidylcholine (1-16:1, 2-16:1) [lipid particle]
1-acylglycerophosphocholine (16:1) [lipid particle]
phosphatidylcholine (1-18:0, 2-16:1) [lipid particle]
1-acylglycerophosphocholine (18:0) [lipid particle]
phosphatidylcholine (1-18:1, 2-16:1) [lipid particle]
1-acylglycerophosphocholine (18:1) [lipid particle]
phosphatidylcholine (1-16:0, 2-18:1) [lipid particle]
phosphatidylcholine (1-16:1, 2-18:1) [lipid particle]
phosphatidylcholine (1-18:0, 2-18:1) [lipid particle]
phosphatidylcholine (1-18:1, 2-18:1) [lipid particle]
phosphatidylethanolamine (1-16:0, 2-16:1) [lipid particle]
phosphatidylethanolamine (1-16:1, 2-16:1) [lipid particle]
phosphatidylethanolamine (1-18:0, 2-16:1) [lipid particle]
phosphatidylethanolamine (1-18:1, 2-16:1) [lipid particle]
